# Supplementary material for: Iodide-umpolung catalytic system for non-traditional amide coupling from nitroalkanes and amines
Source: Royal Society of Chemistry journal article supplement (doi:10.1039/d4ob00184b), 2024-01-01
Supplement: d4ob00184b1.pdf [file d4ob00184b1.pdf]

## *Supporting Information*

### **Iodide-umpolung catalytic system for the nontraditional amide coupling from nitroalkanes and amines**

Chun-Lin Chen, Tian-Sih Huang, Po-Hsiang Chang, Che-Sheng Hsu\*

# <sup>1</sup>H, <sup>13</sup>C, <sup>19</sup>F, and <sup>31</sup>P NMR Spectra

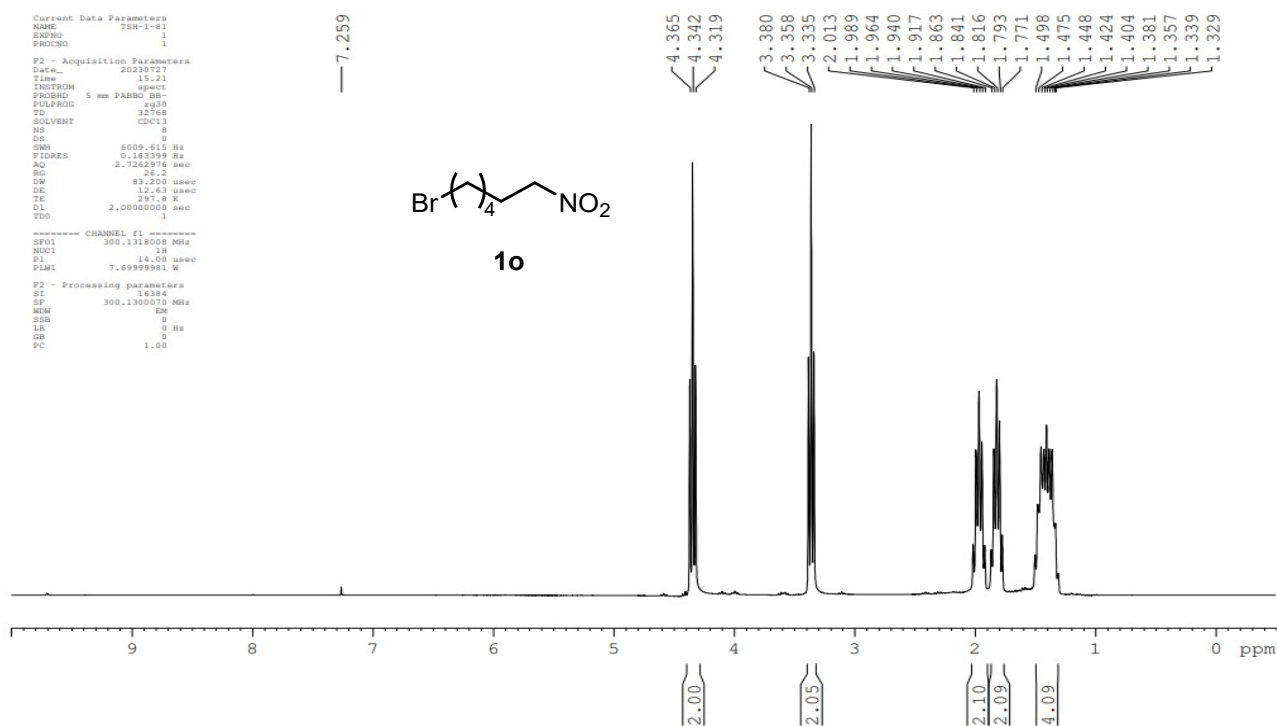

Figure S1. <sup>1</sup>H NMR spectrum of compound **1o** (CDCl<sub>3</sub>, 300 MHz)

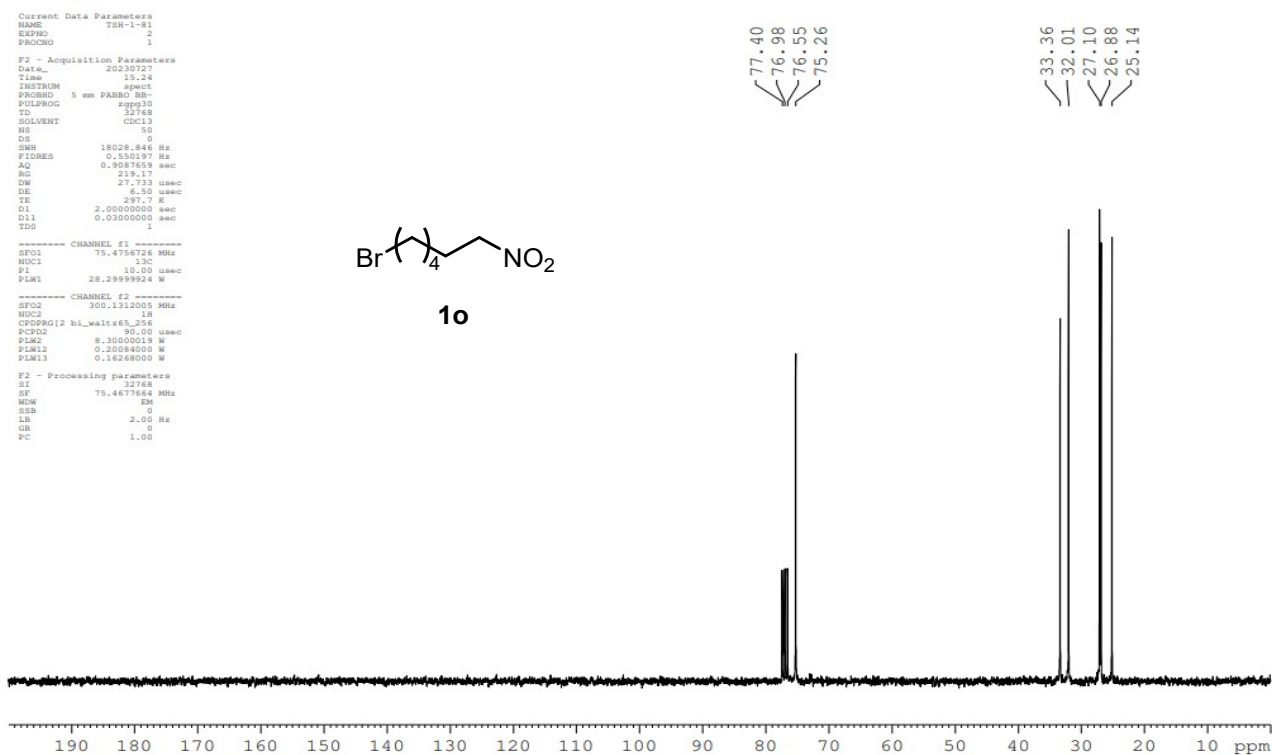

Figure S2. <sup>13</sup>C NMR spectrum of compound **1o** (CDCl<sub>3</sub>, 75 MHz)

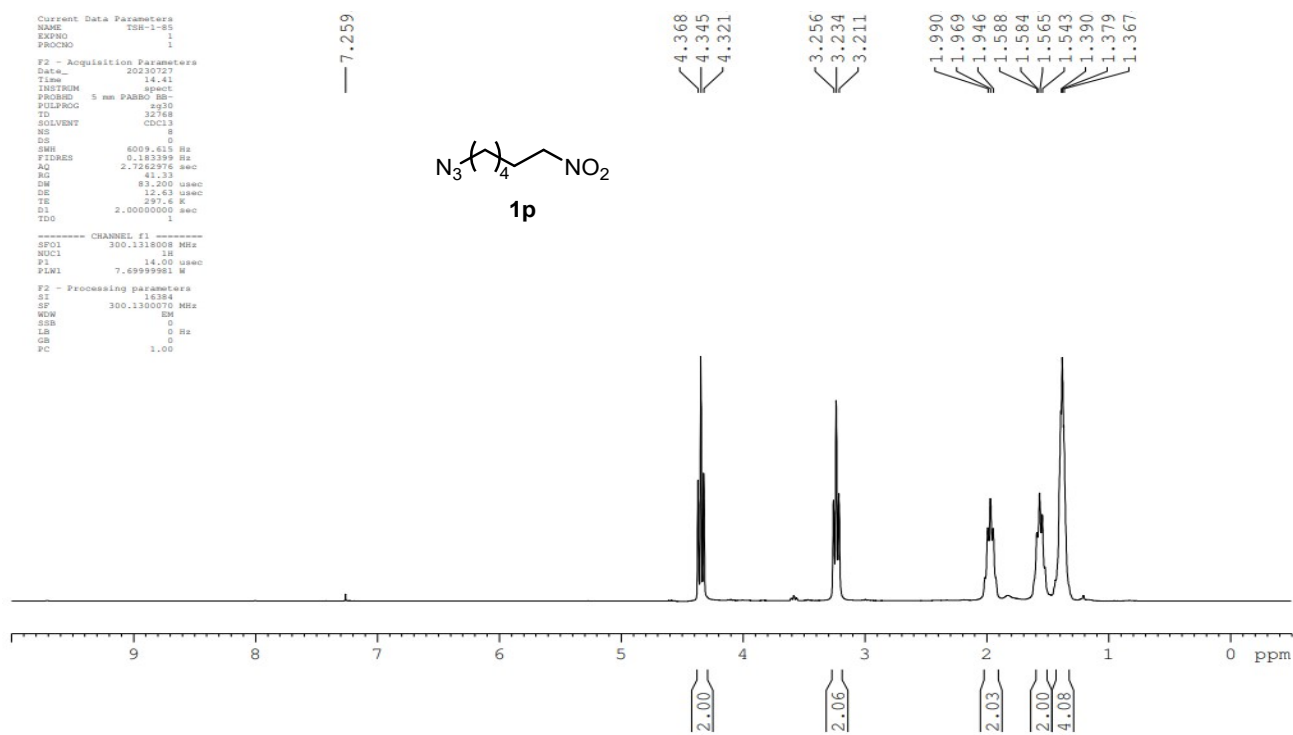

Figure S3.  $^1\text{H}$  NMR spectrum of compound **1p** ( $\text{CDCl}_3$ , 300 MHz)

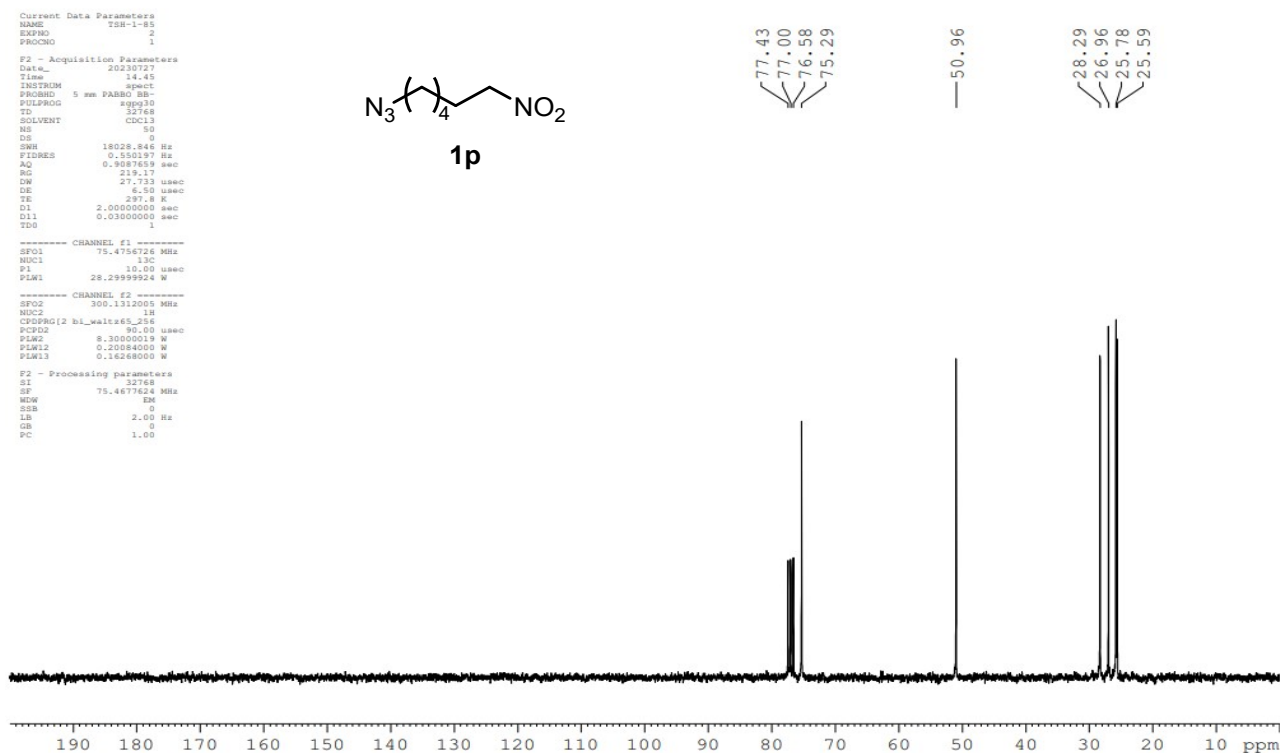

Figure S4.  $^{13}\text{C}$  NMR spectrum of compound **1p** ( $\text{CDCl}_3$ , 75 MHz)

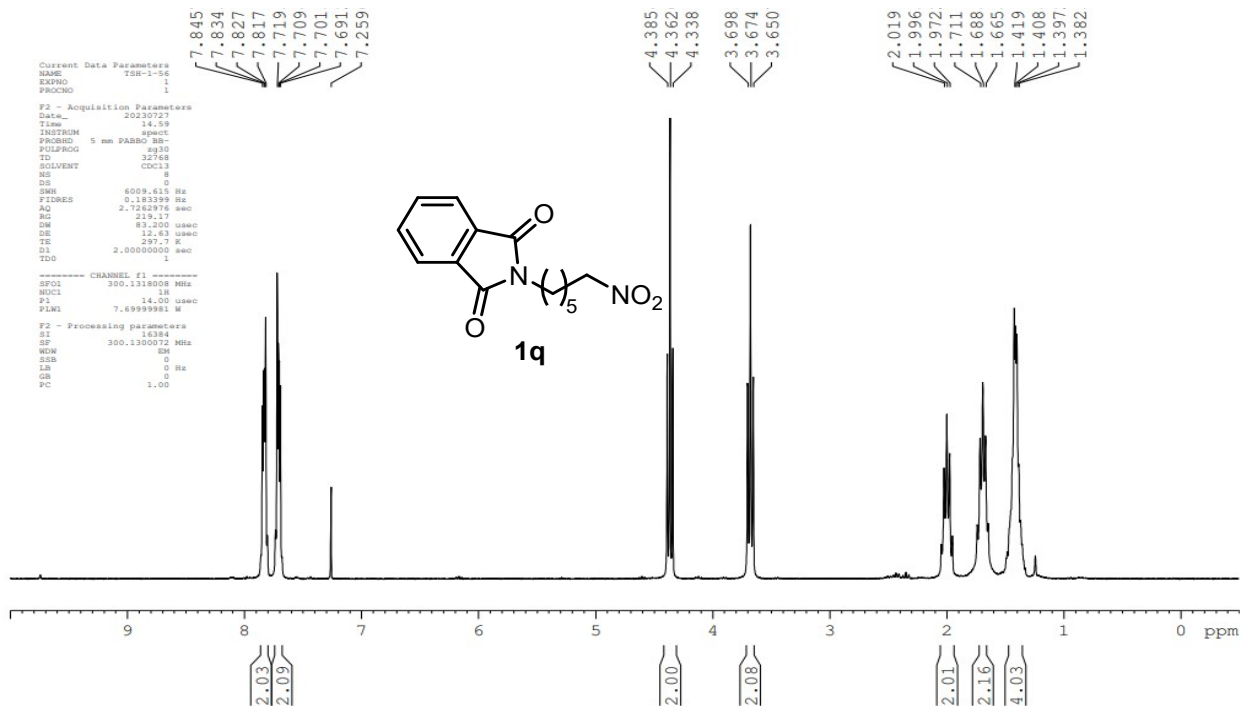

Figure S5. <sup>1</sup>H NMR spectrum of compound **1q** (CDCl<sub>3</sub>, 300 MHz)

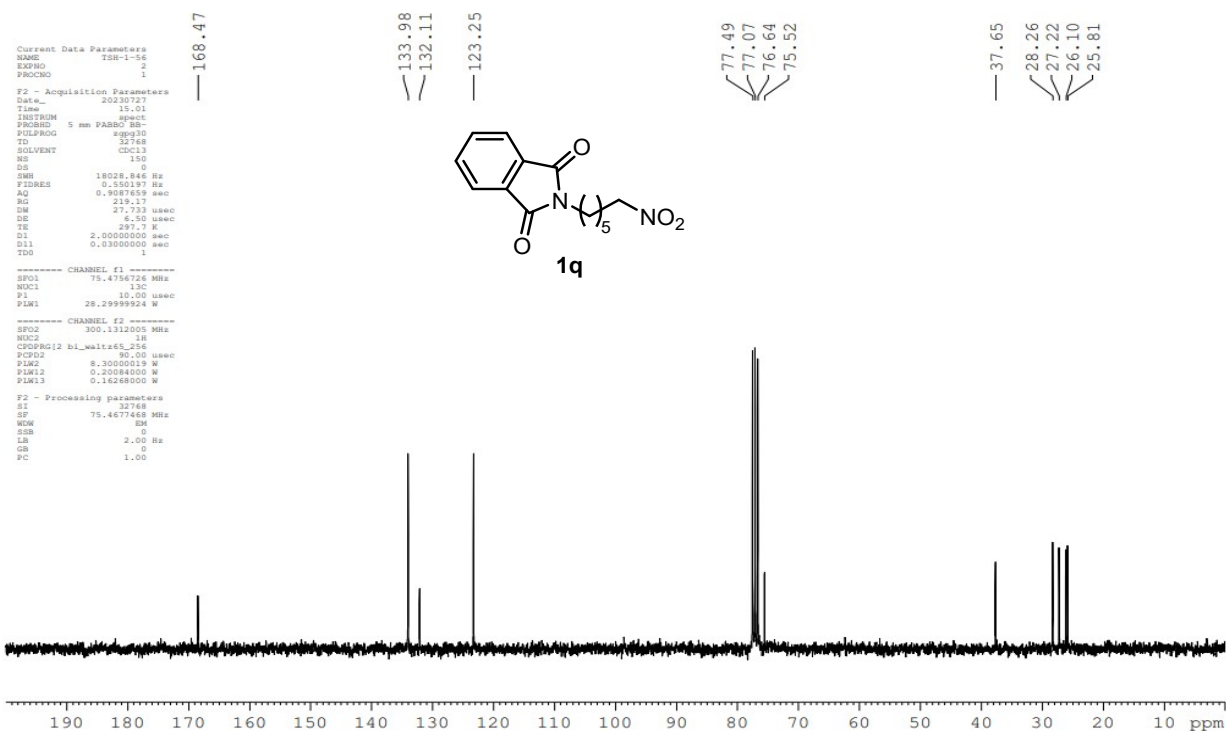

Figure S6. <sup>13</sup>C NMR spectrum of compound **1q** (CDCl<sub>3</sub>, 75 MHz)

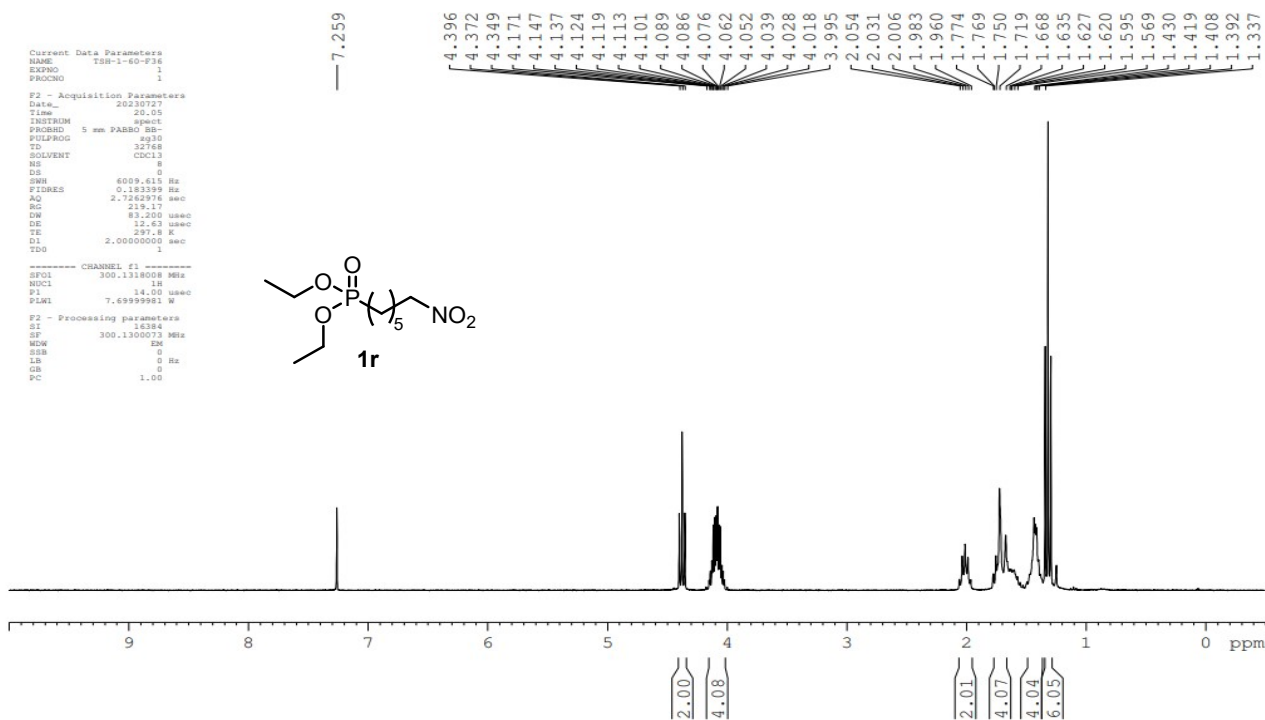

Figure S7.  $^1\text{H}$  NMR spectrum of compound **1r** ( $\text{CDCl}_3$ , 300 MHz)

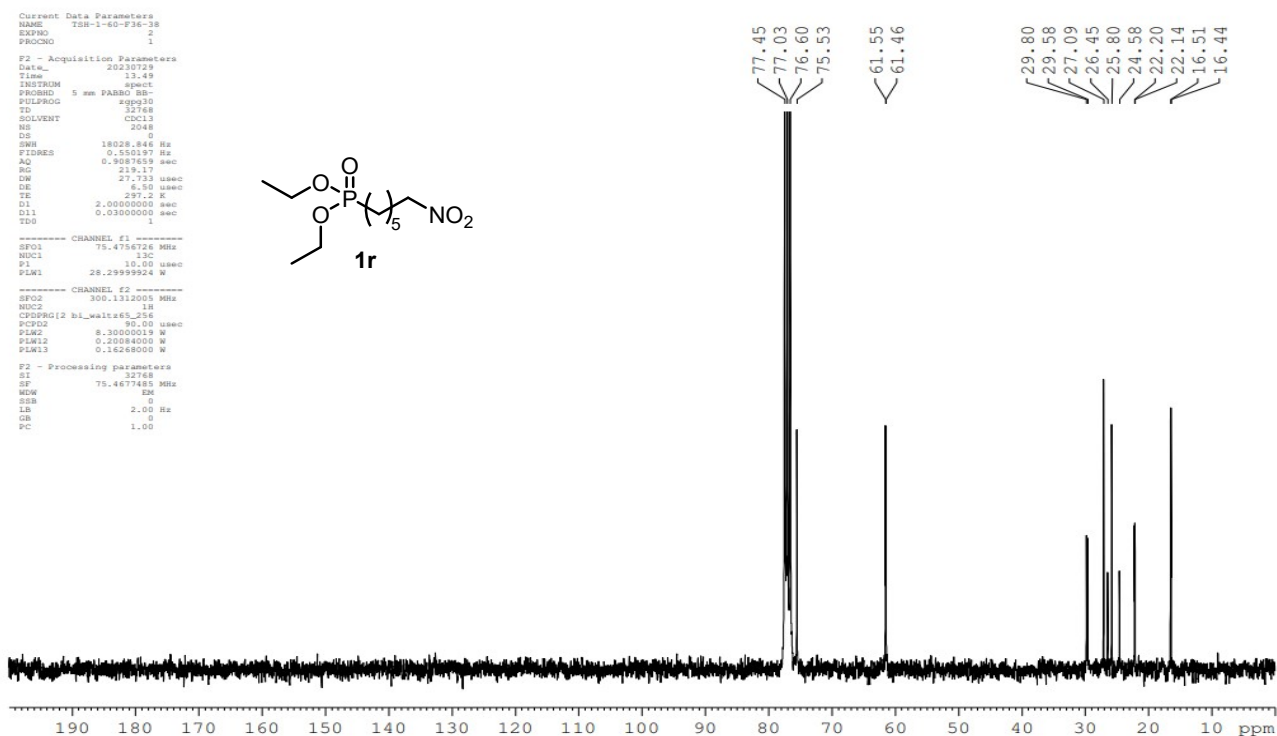

Figure S8.  $^{13}\text{C}$  NMR spectrum of compound **1r** ( $\text{CDCl}_3$ , 75 MHz)

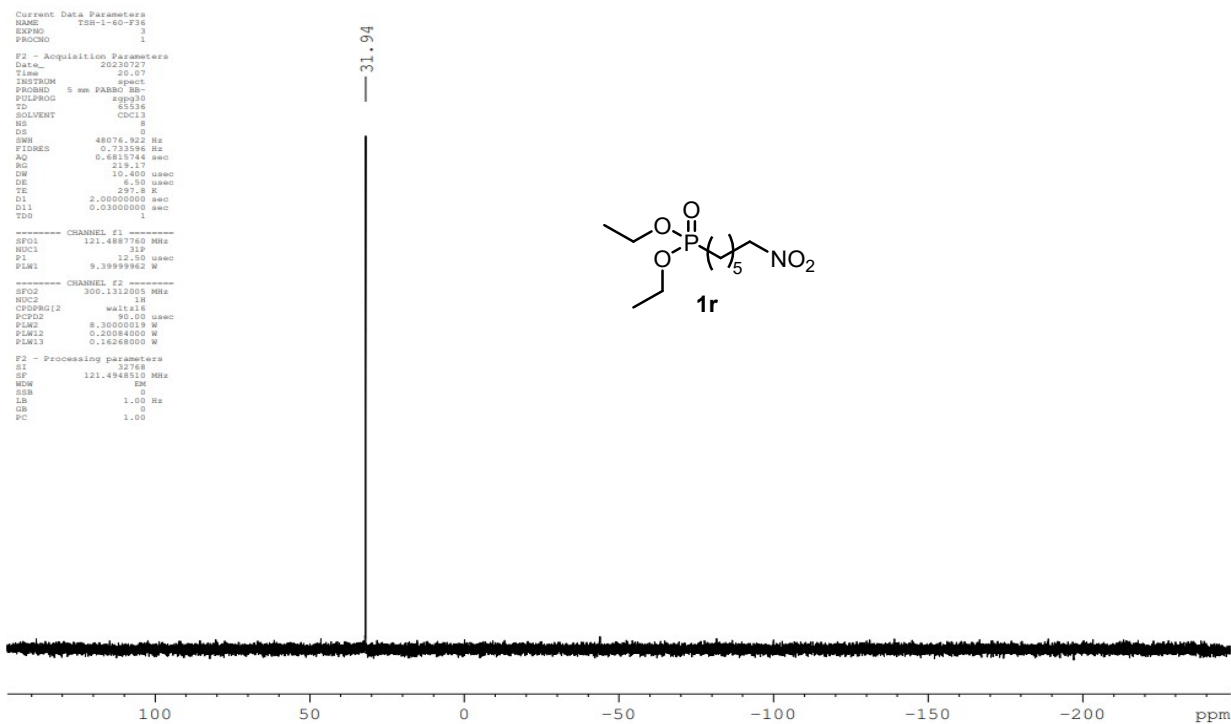

Figure S9.  $^{31}\text{P}$  NMR spectrum of compound **1r** ( $\text{CDCl}_3$ , 121 MHz)

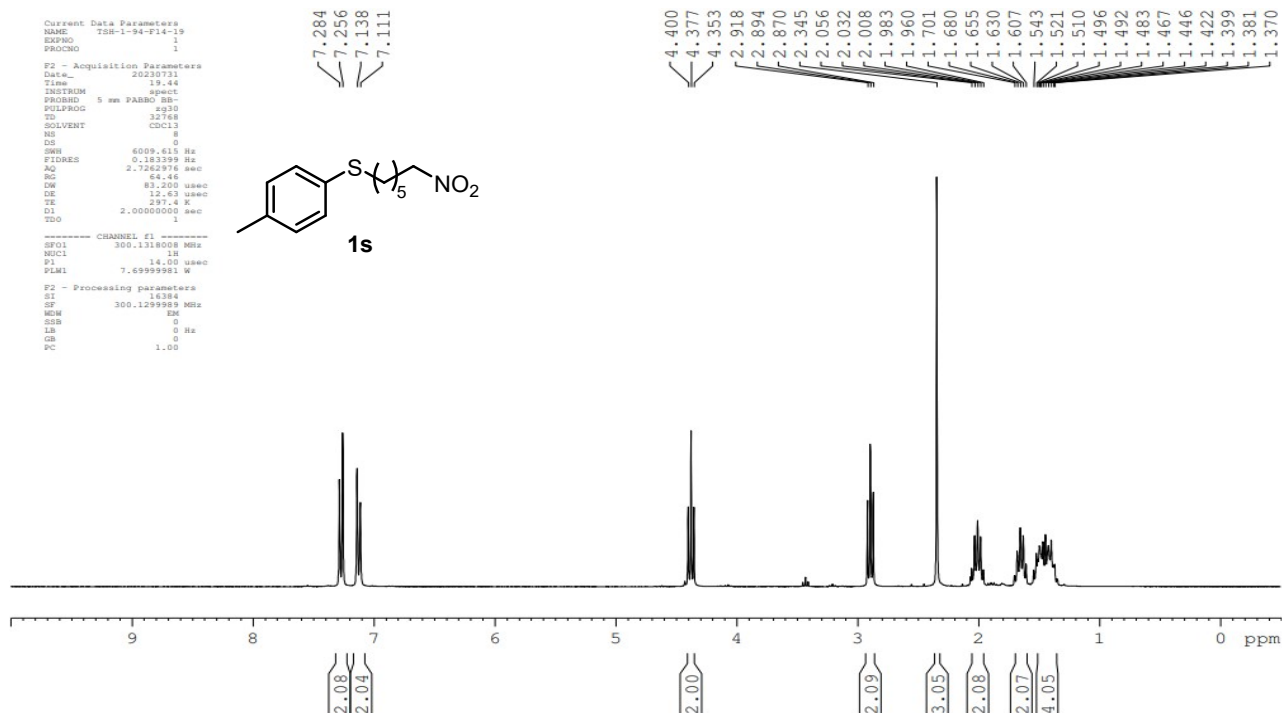

Figure S10.  $^1\text{H}$  NMR spectrum of compound **1s** ( $\text{CDCl}_3$ , 300 MHz)

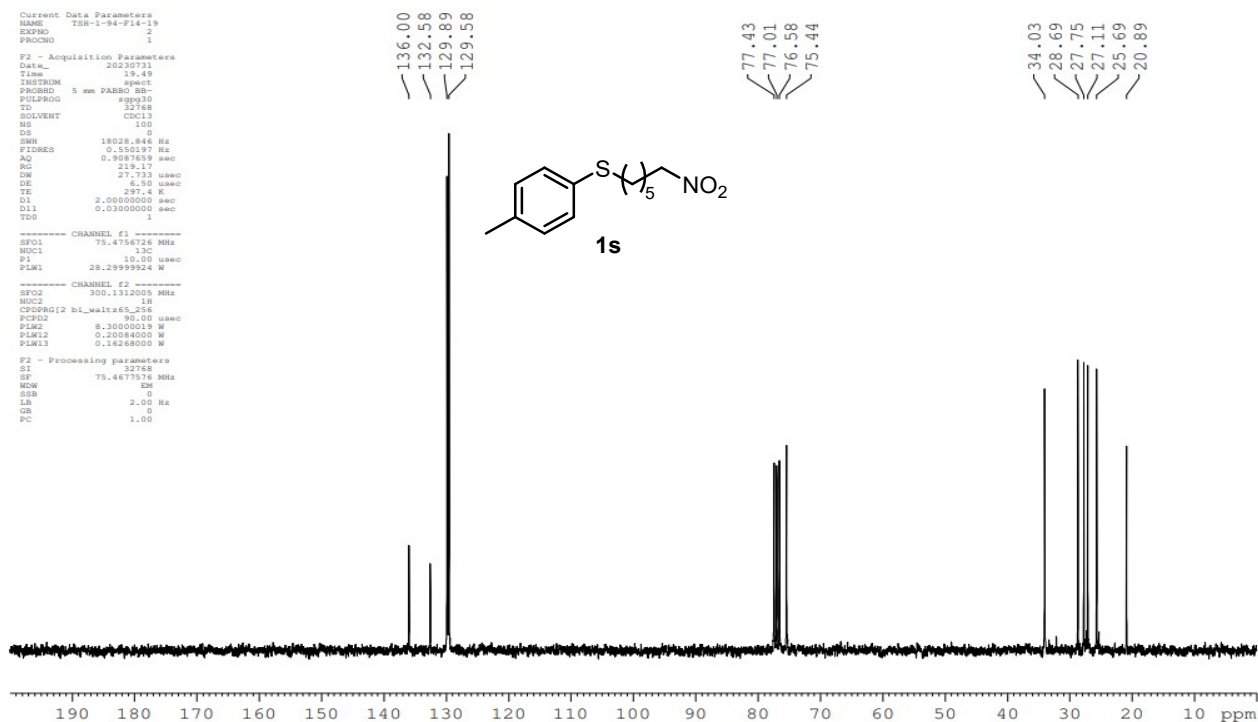

Figure S11. <sup>13</sup>C NMR spectrum of compound **1s** (CDCl<sub>3</sub>, 75 MHz)

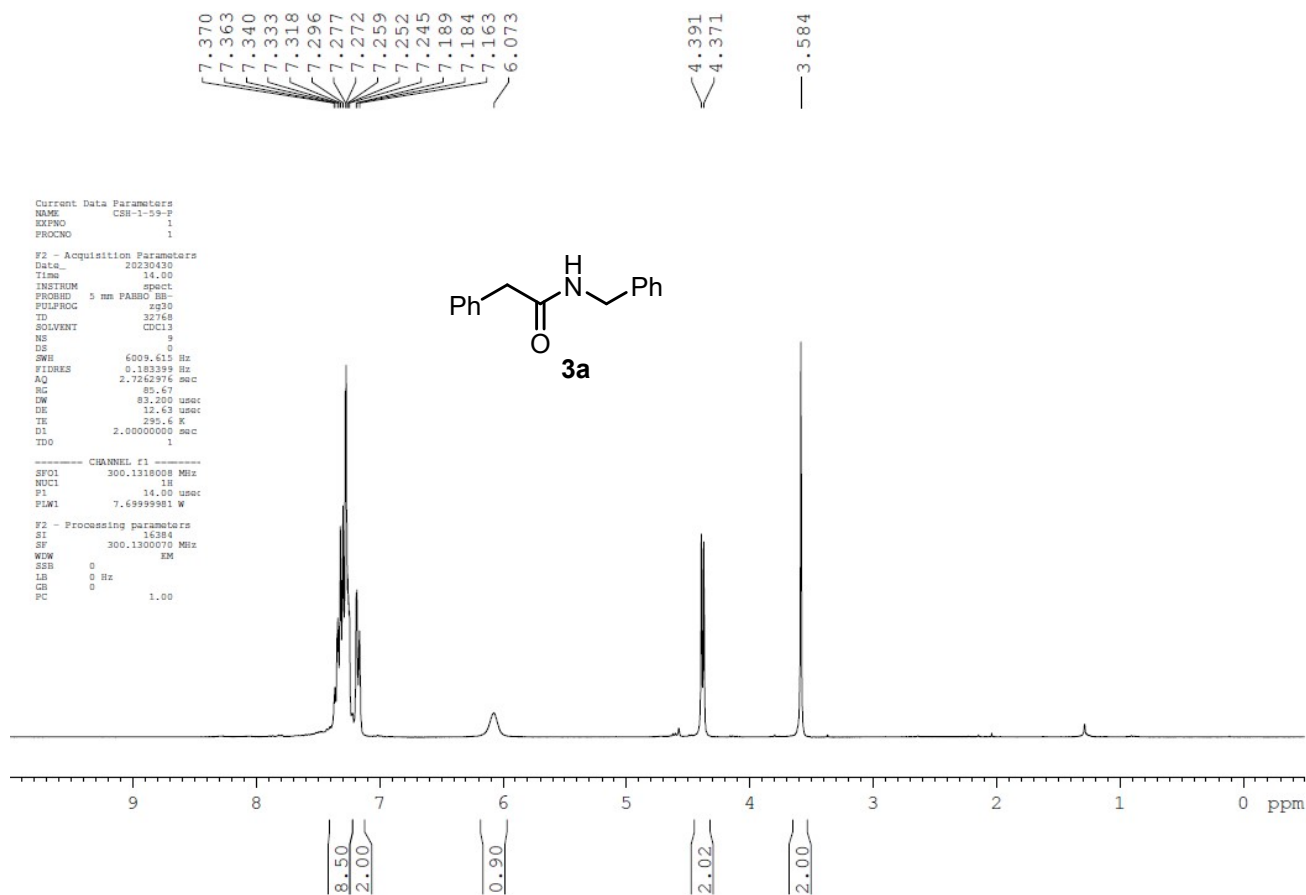

Figure S12. <sup>1</sup>H NMR spectrum of compound **3a** (CDCl<sub>3</sub>, 300 MHz)

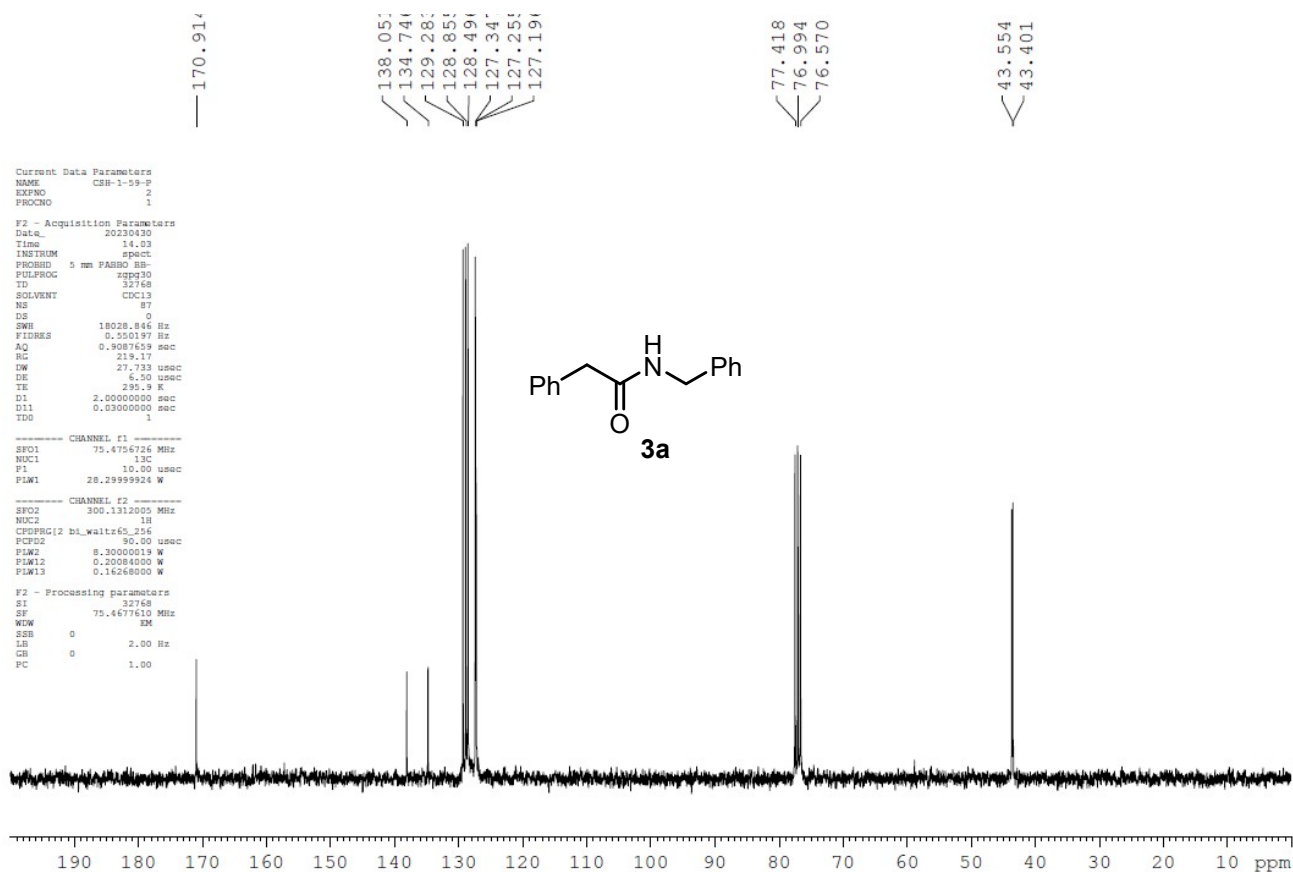

Figure S13. <sup>13</sup>C NMR spectrum of compound **3a** (CDCl<sub>3</sub>, 75 MHz)

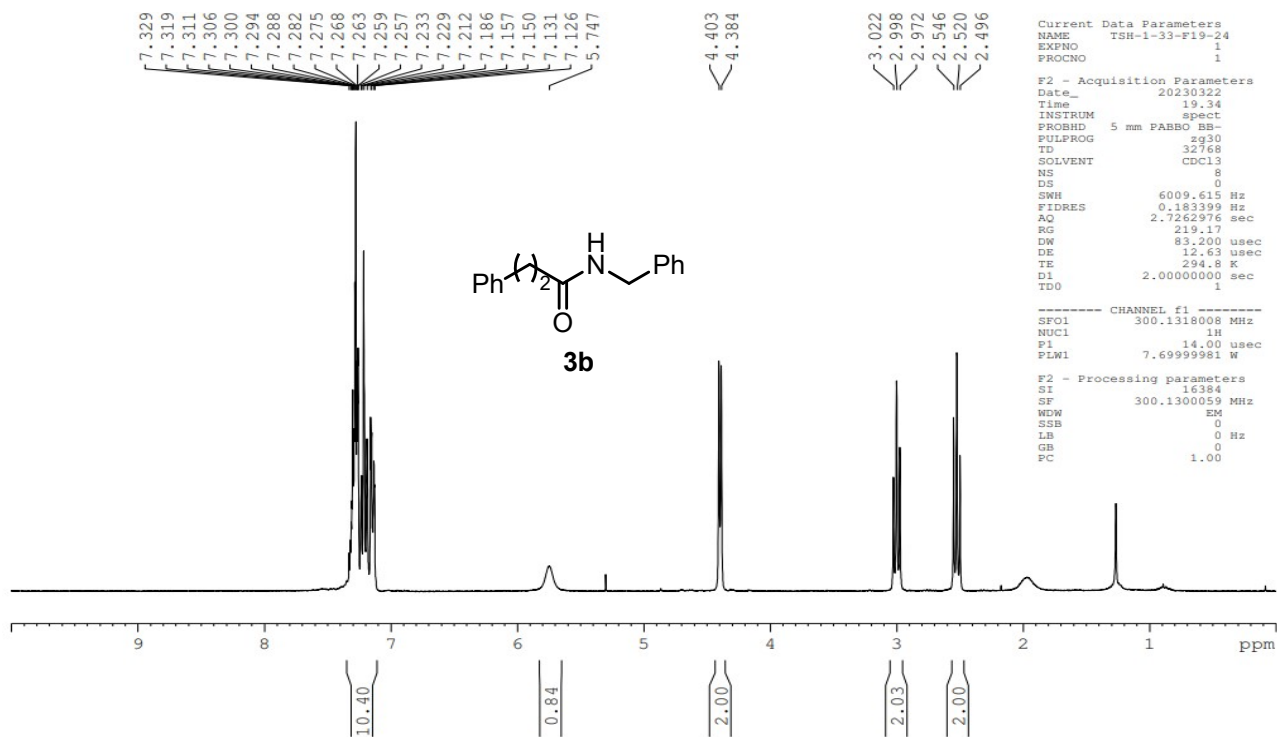

Figure S14. <sup>1</sup>H NMR spectrum of compound **3b** (CDCl<sub>3</sub>, 300 MHz)



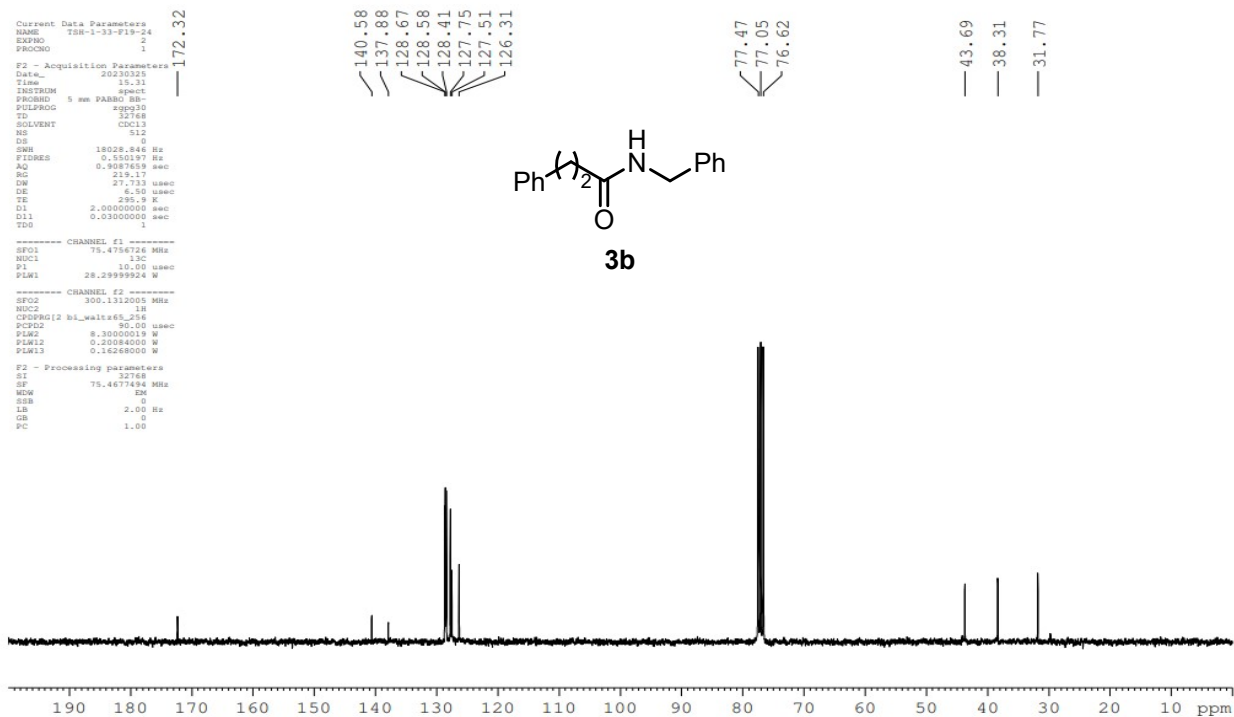

Figure S15.  $^{13}\text{C}$  NMR spectrum of compound **3b** ( $\text{CDCl}_3$ , 75 MHz)

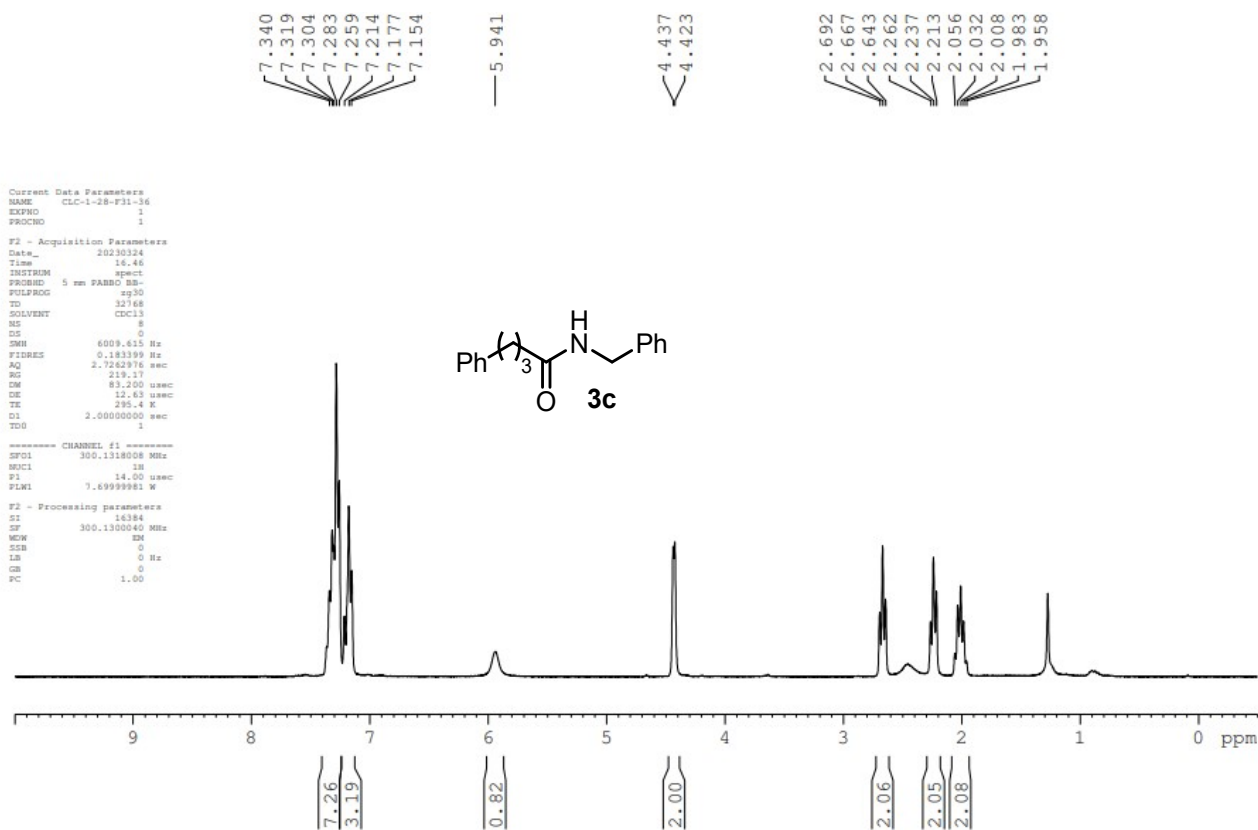

Figure S16.  $^1\text{H}$  NMR spectrum of compound **3c** ( $\text{CDCl}_3$ , 300 MHz)

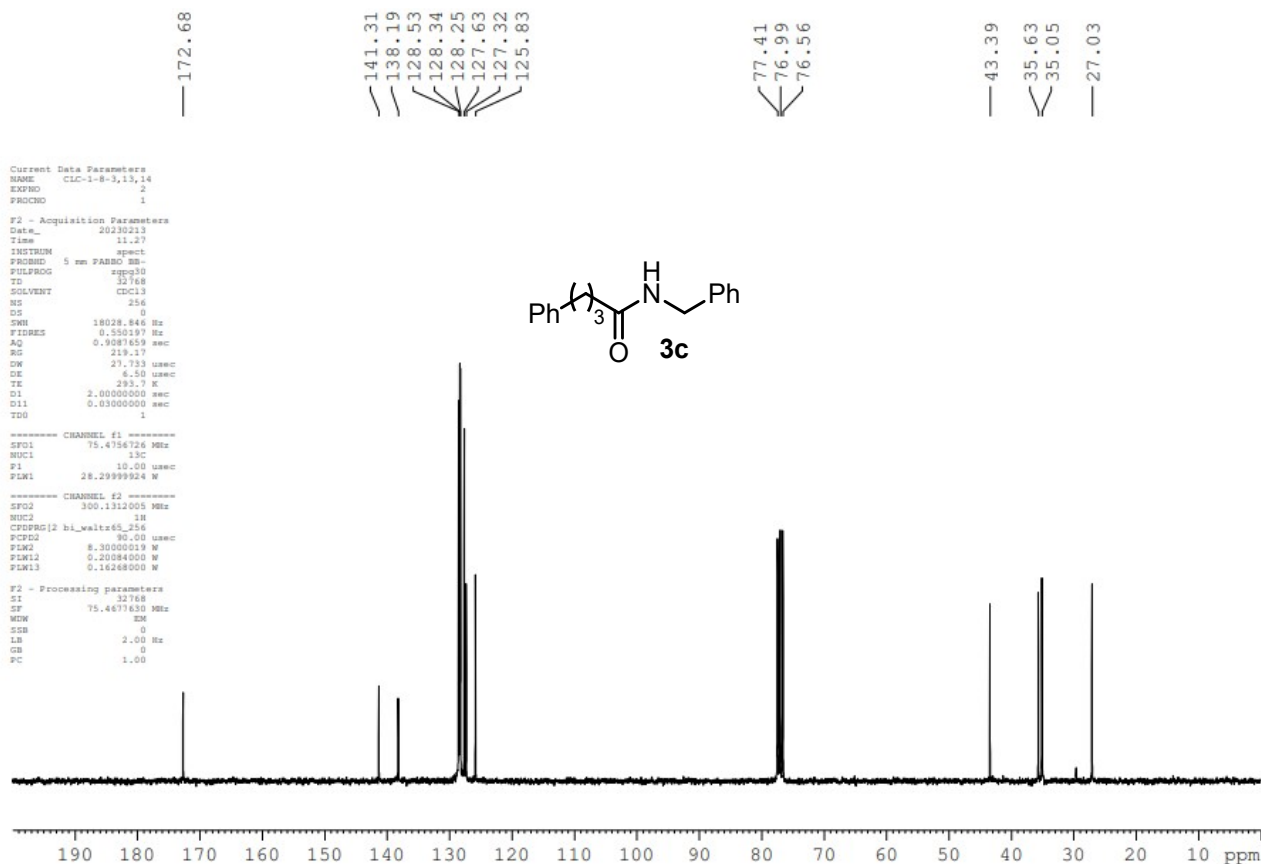

Figure S17. <sup>13</sup>C NMR spectrum of compound **3c** (CDCl<sub>3</sub>, 75 MHz)

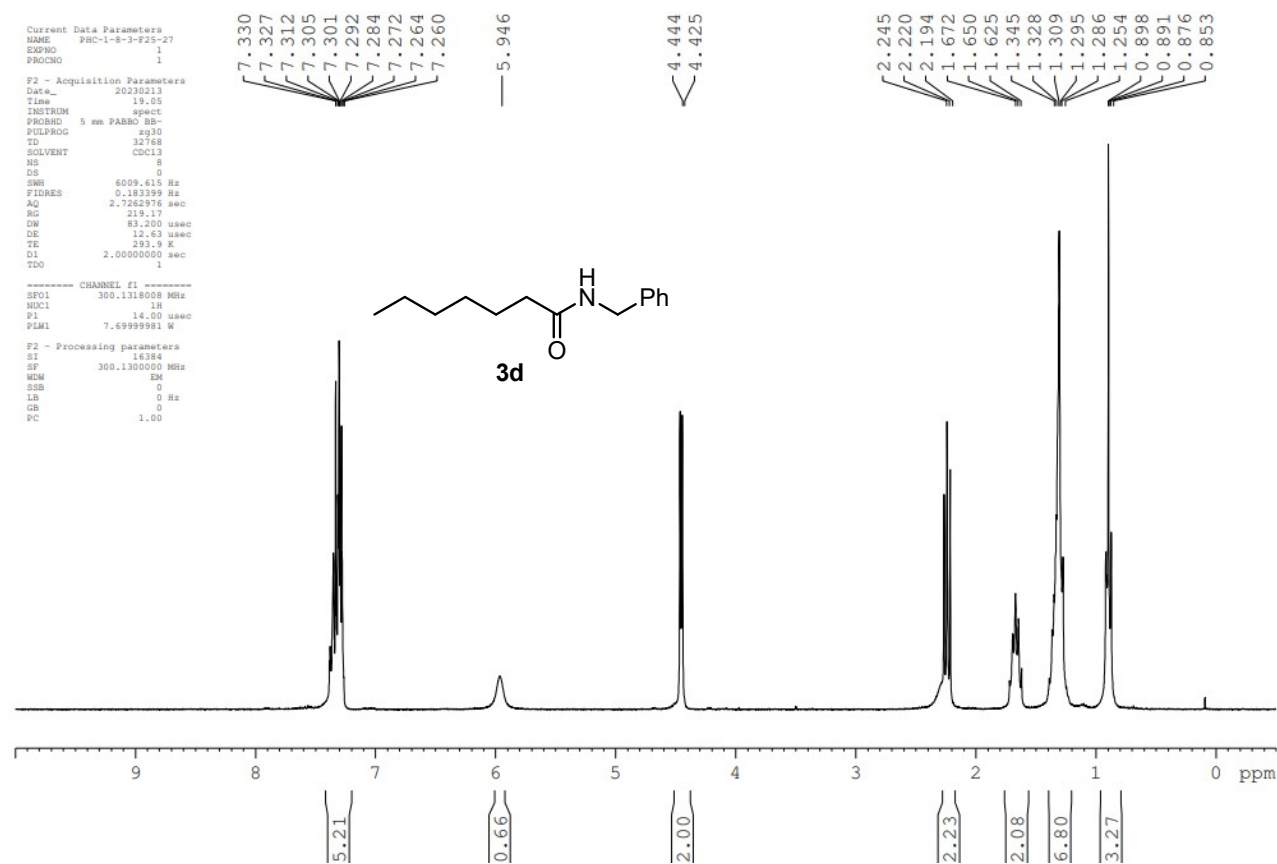

Figure S18. <sup>1</sup>H NMR spectrum of compound **3d** (CDCl<sub>3</sub>, 300 MHz)

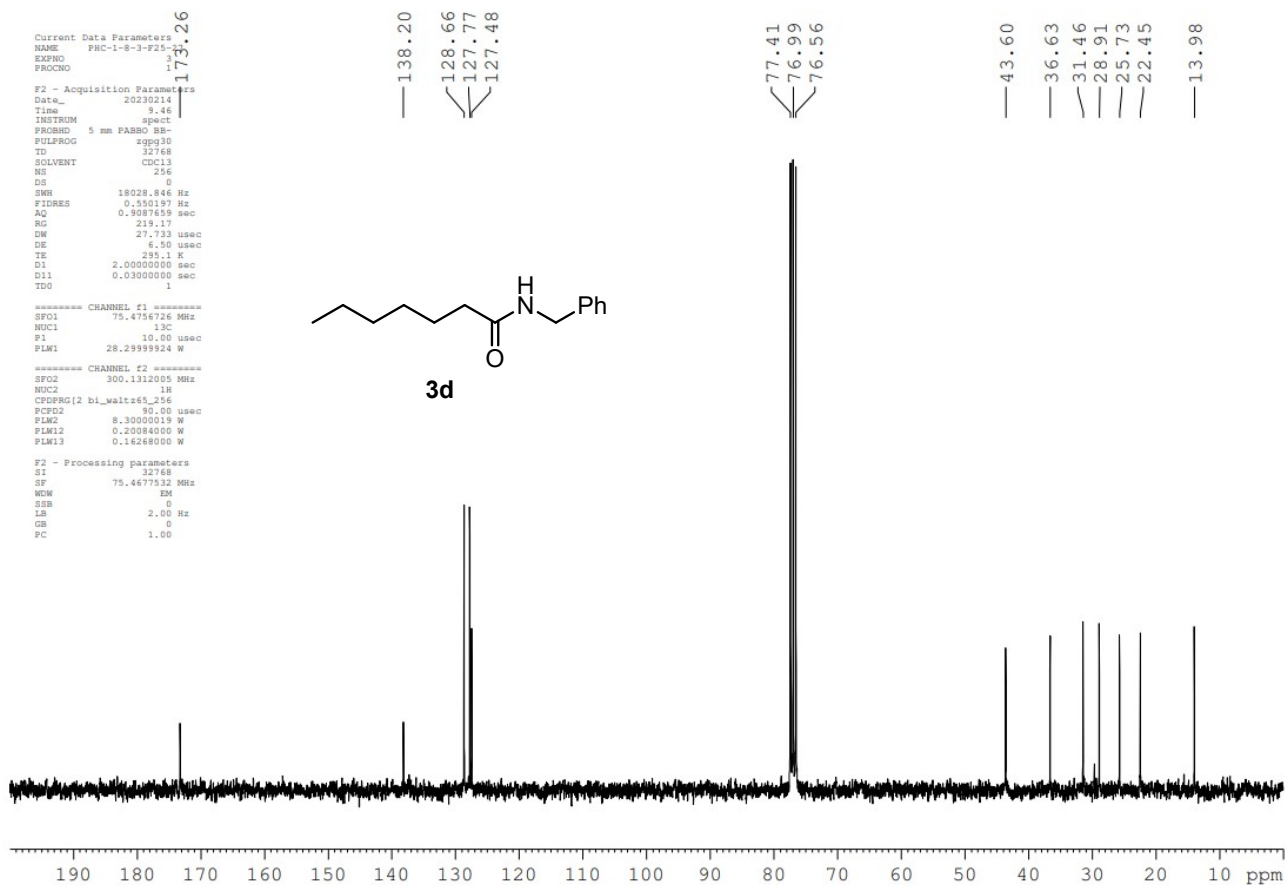

Figure S19. <sup>13</sup>C NMR spectrum of compound **3d** (CDCl<sub>3</sub>, 75 MHz)

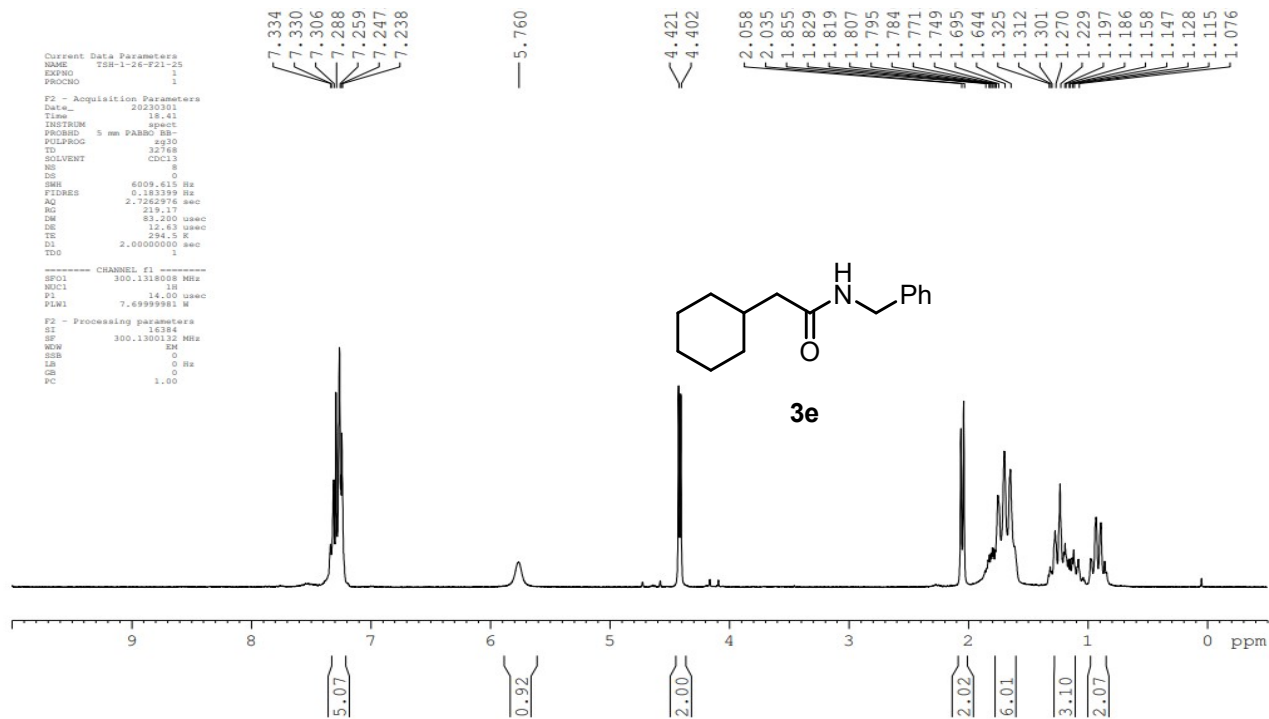

Figure S20. <sup>1</sup>H NMR spectrum of compound **3e** (CDCl<sub>3</sub>, 300 MHz)

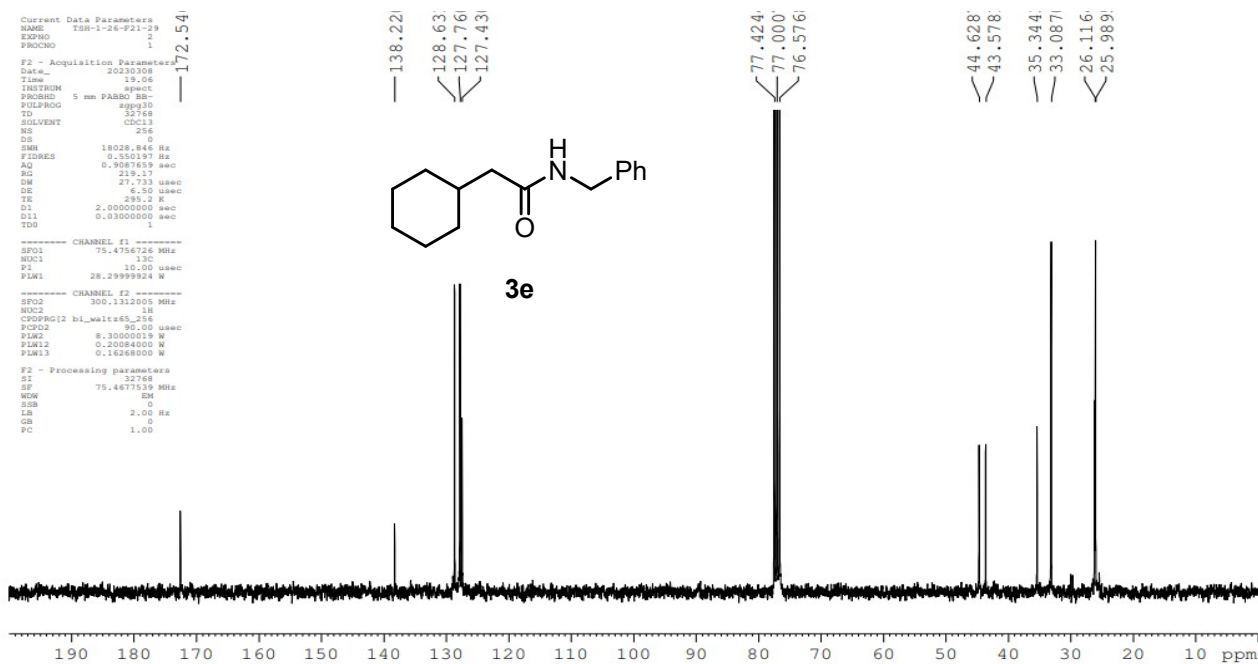

Figure S21.  $^{13}\text{C}$  NMR spectrum of compound **3e** ( $\text{CDCl}_3$ , 75 MHz)

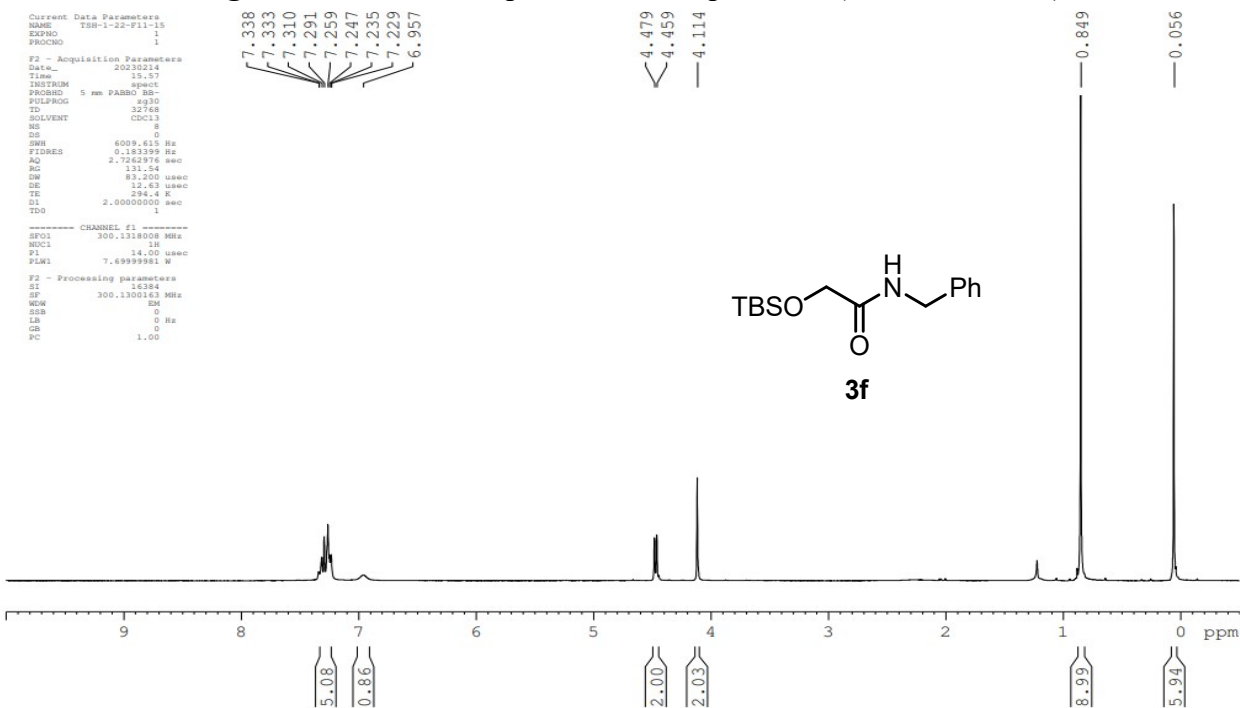

Figure S22.  $^1\text{H}$  NMR spectrum of compound **3f** ( $\text{CDCl}_3$ , 300 MHz)

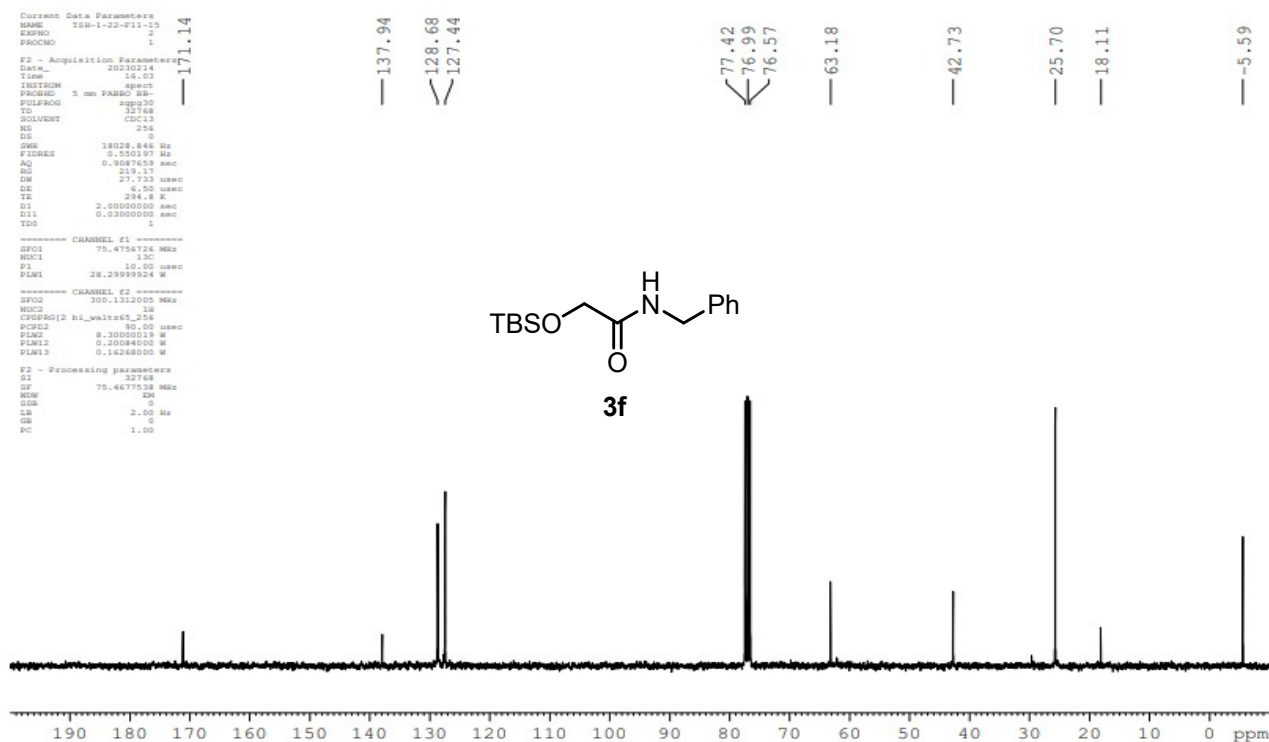

Figure S23. <sup>13</sup>C NMR spectrum of compound **3f** (CDCl<sub>3</sub>, 75 MHz)

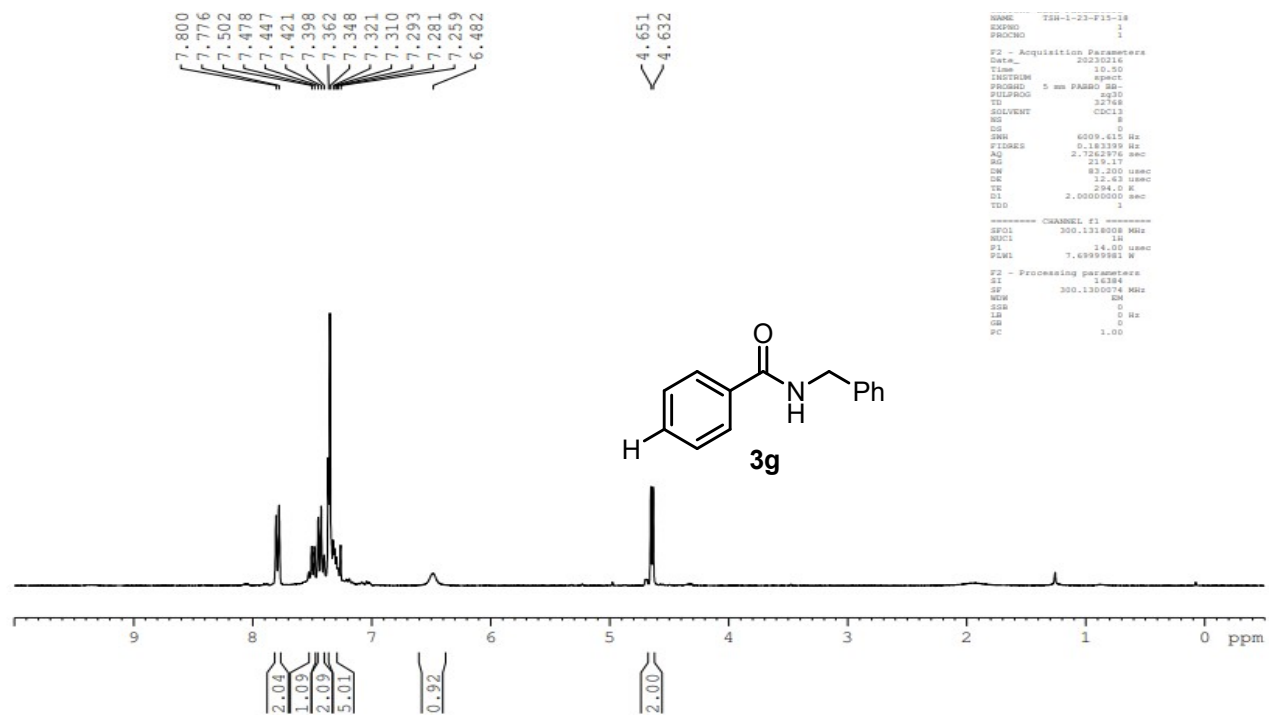

Figure S24. <sup>1</sup>H NMR spectrum of compound **3g** (CDCl<sub>3</sub>, 300 MHz)

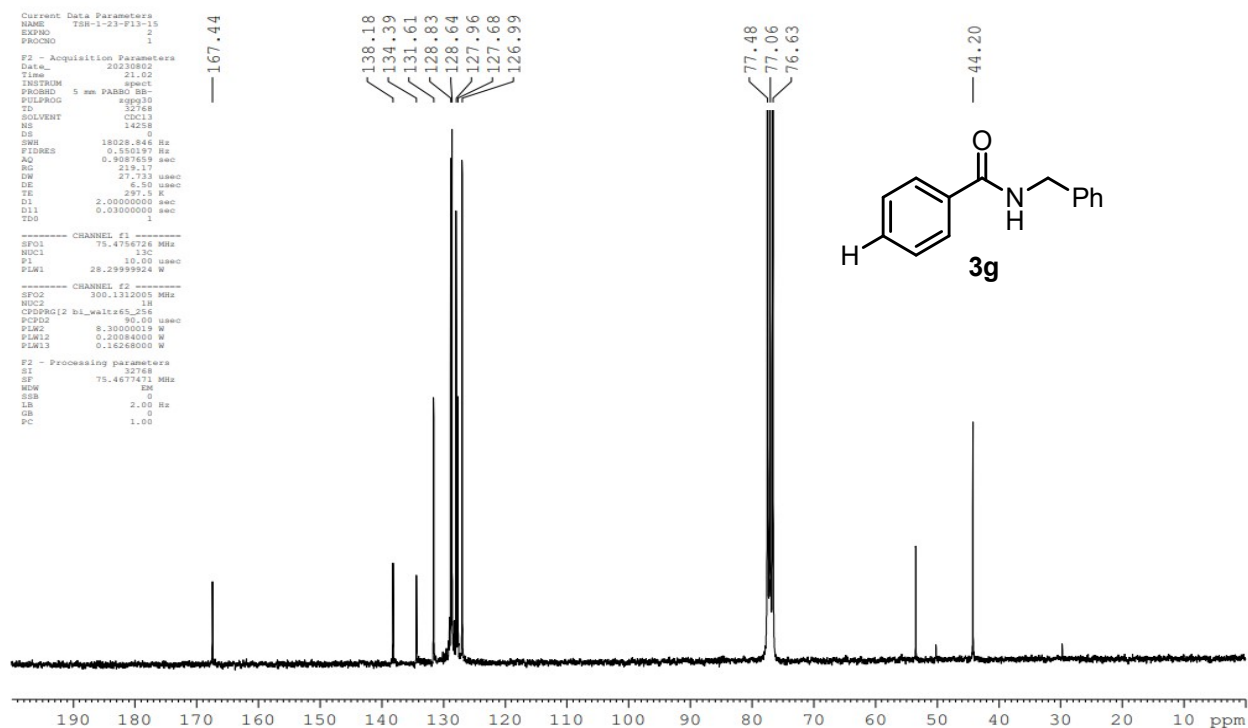

Figure S25.  $^{13}\text{C}$  NMR spectrum of compound **3g** ( $\text{CDCl}_3$ , 75 MHz)

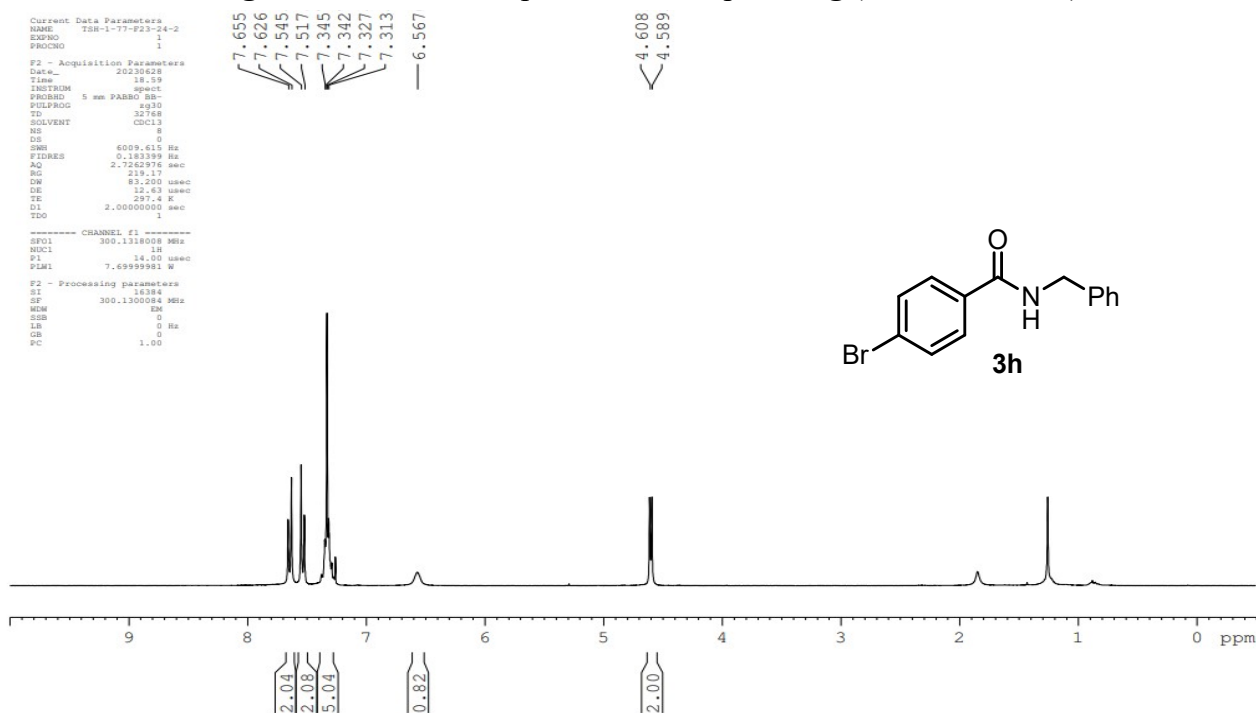

Figure S26.  $^1\text{H}$  NMR spectrum of compound **3h** ( $\text{CDCl}_3$ , 300 MHz)

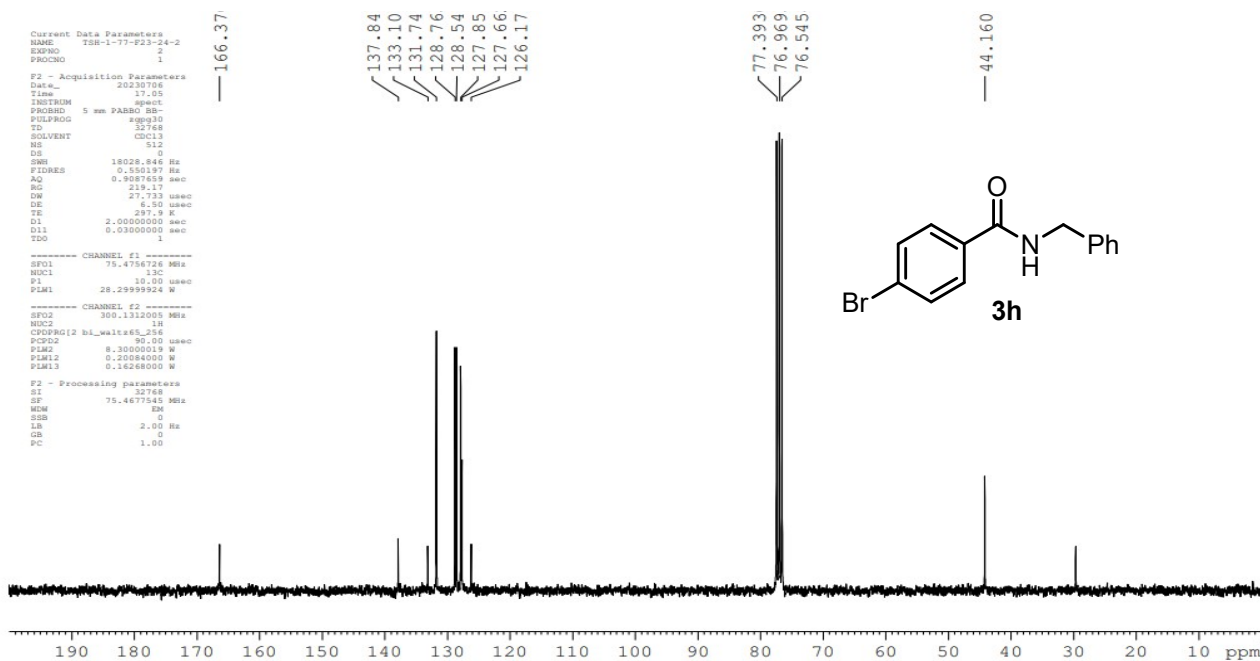

Figure S27.  $^{13}\text{C}$  NMR spectrum of compound **3h** ( $\text{CDCl}_3$ , 75 MHz)

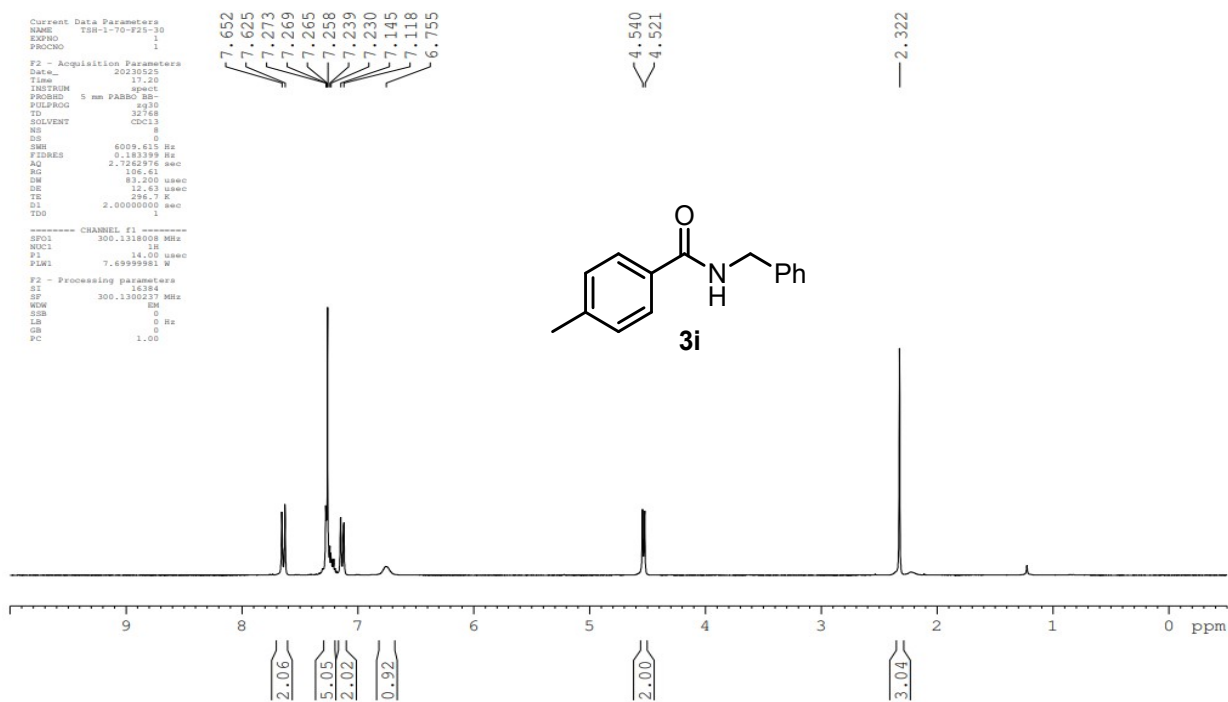

Figure S28.  $^1\text{H}$  NMR spectrum of compound **3i** ( $\text{CDCl}_3$ , 300 MHz)

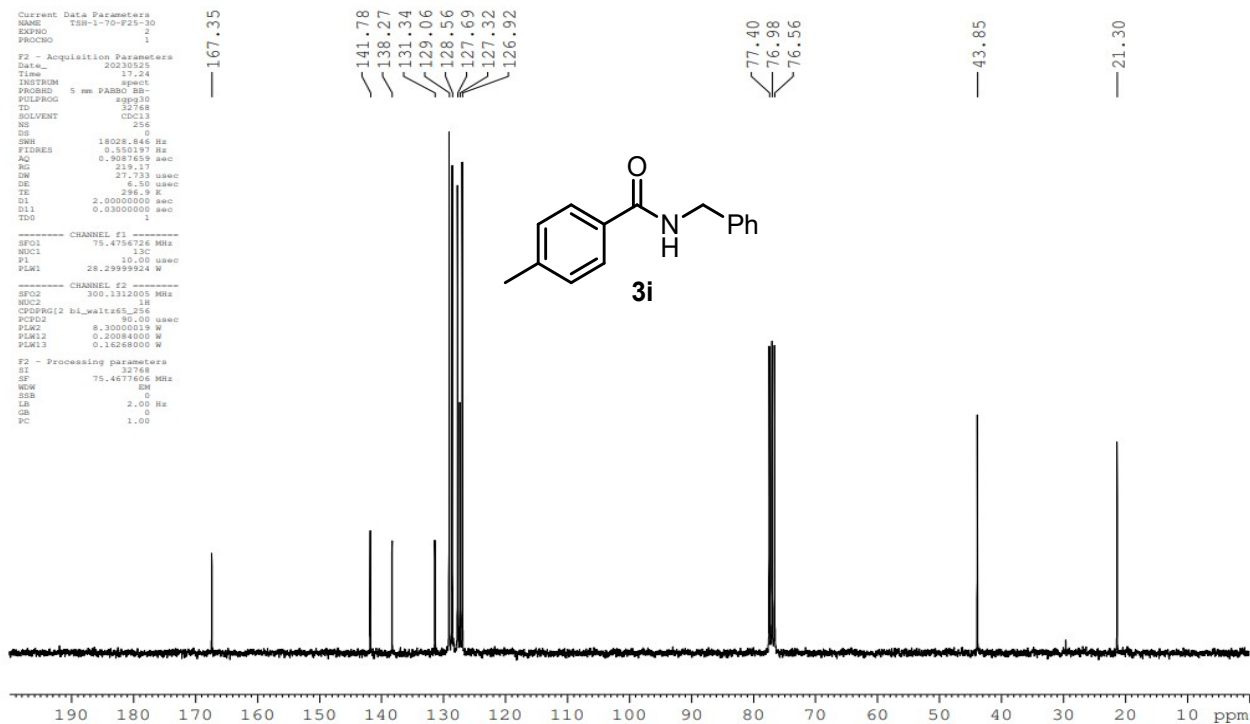

Figure S29. <sup>13</sup>C NMR spectrum of compound **3i** (CDCl<sub>3</sub>, 75 MHz)

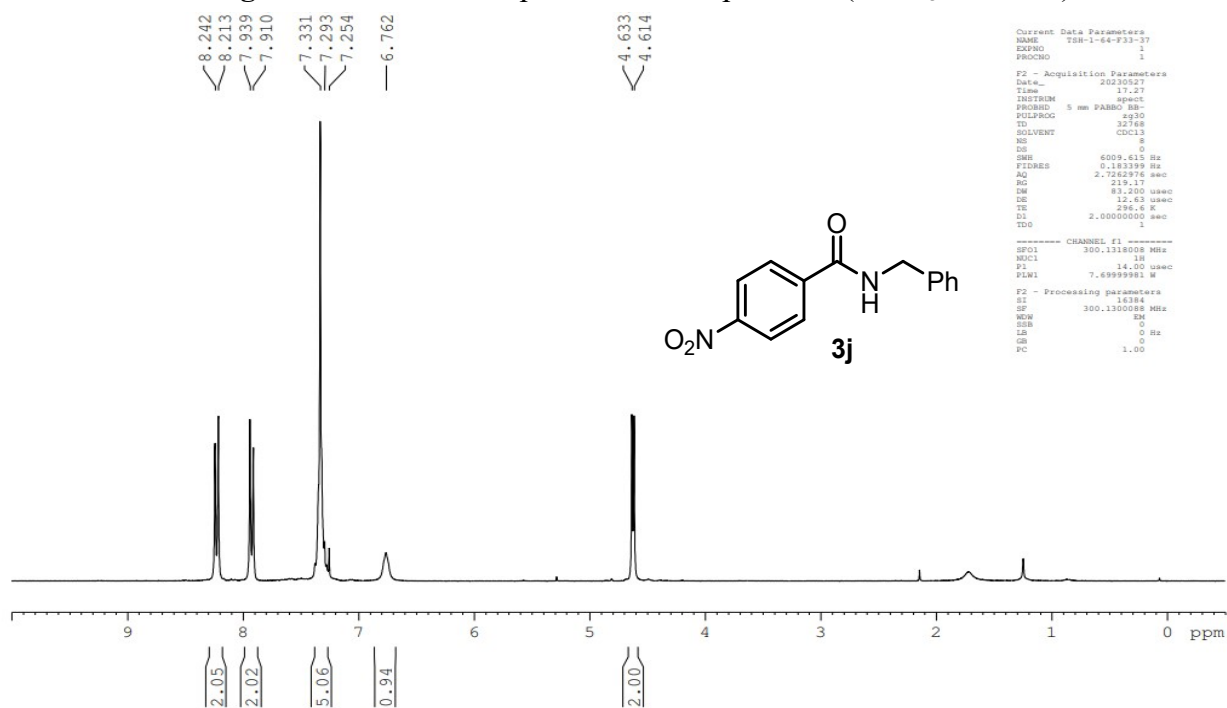

Figure S30. <sup>1</sup>H NMR spectrum of compound **3j** (CDCl<sub>3</sub>, 300 MHz)



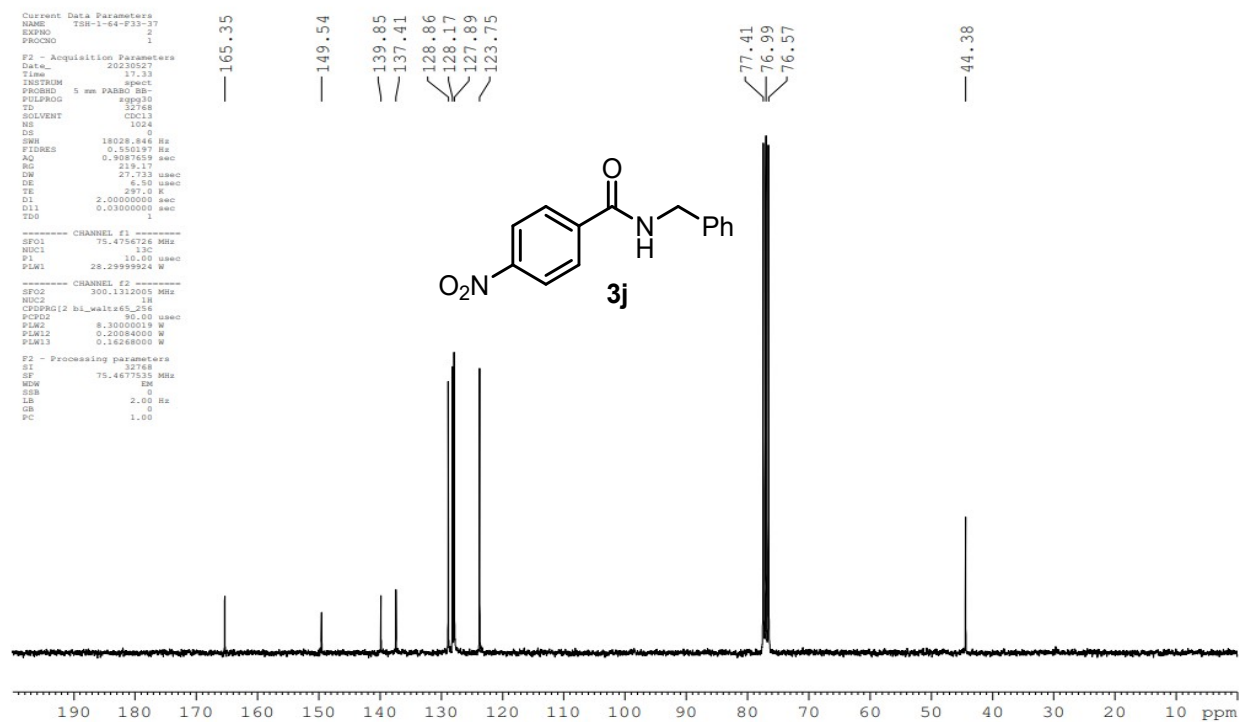

Figure S31.  $^{13}\text{C}$  NMR spectrum of compound **3j** ( $\text{CDCl}_3$ , 75 MHz)

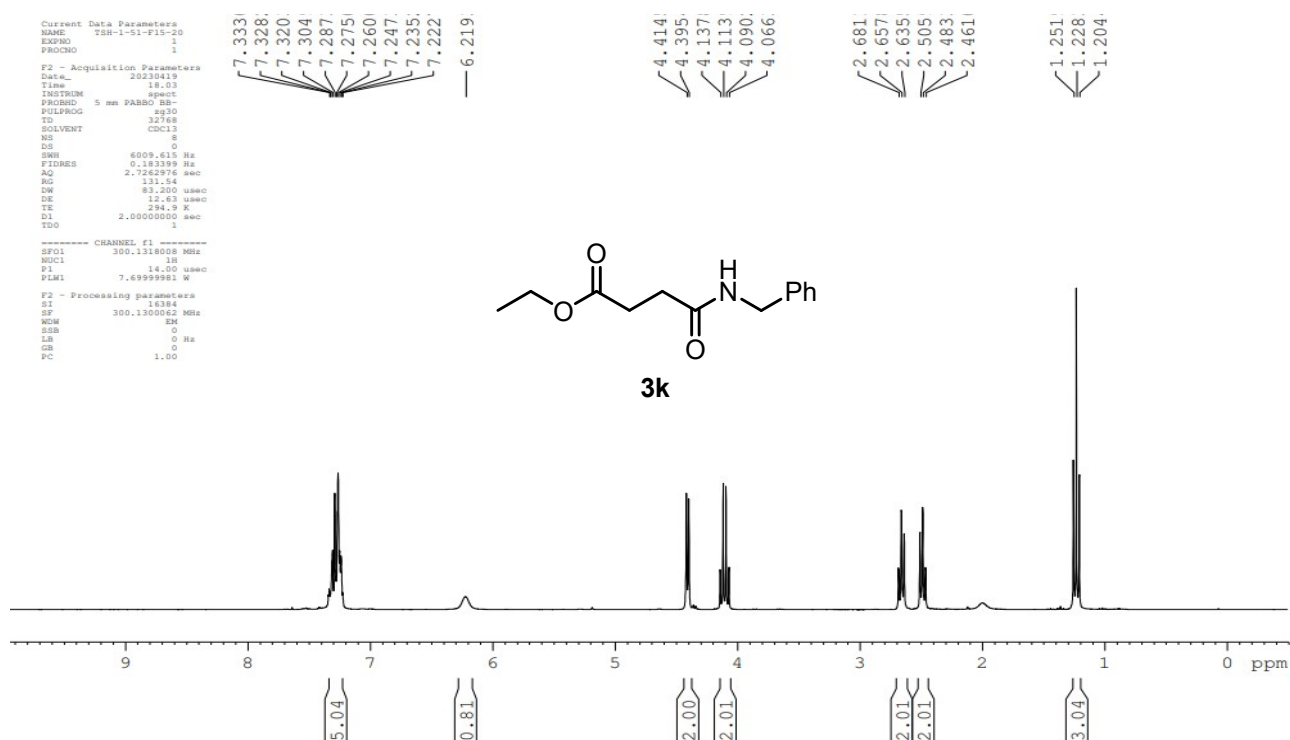

Figure S32.  $^1\text{H}$  NMR spectrum of compound **3k** ( $\text{CDCl}_3$ , 300 MHz)

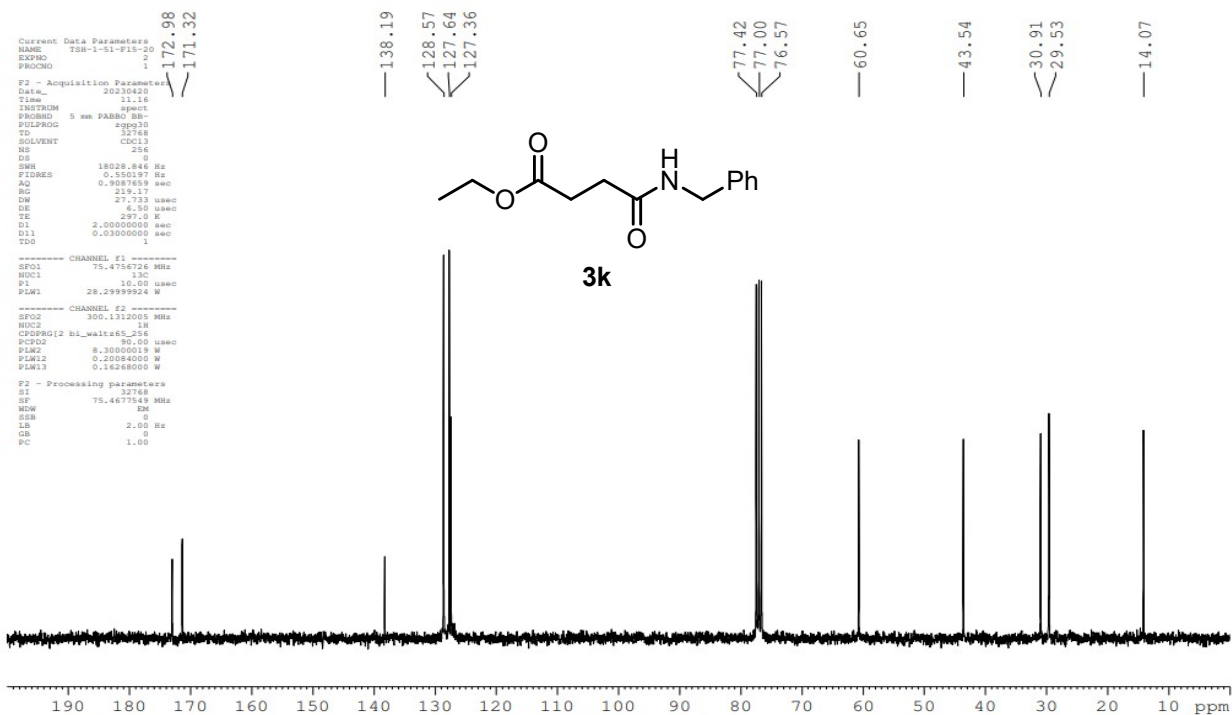

Figure S33. <sup>13</sup>C NMR spectrum of compound **3k** (CDCl<sub>3</sub>, 75 MHz)

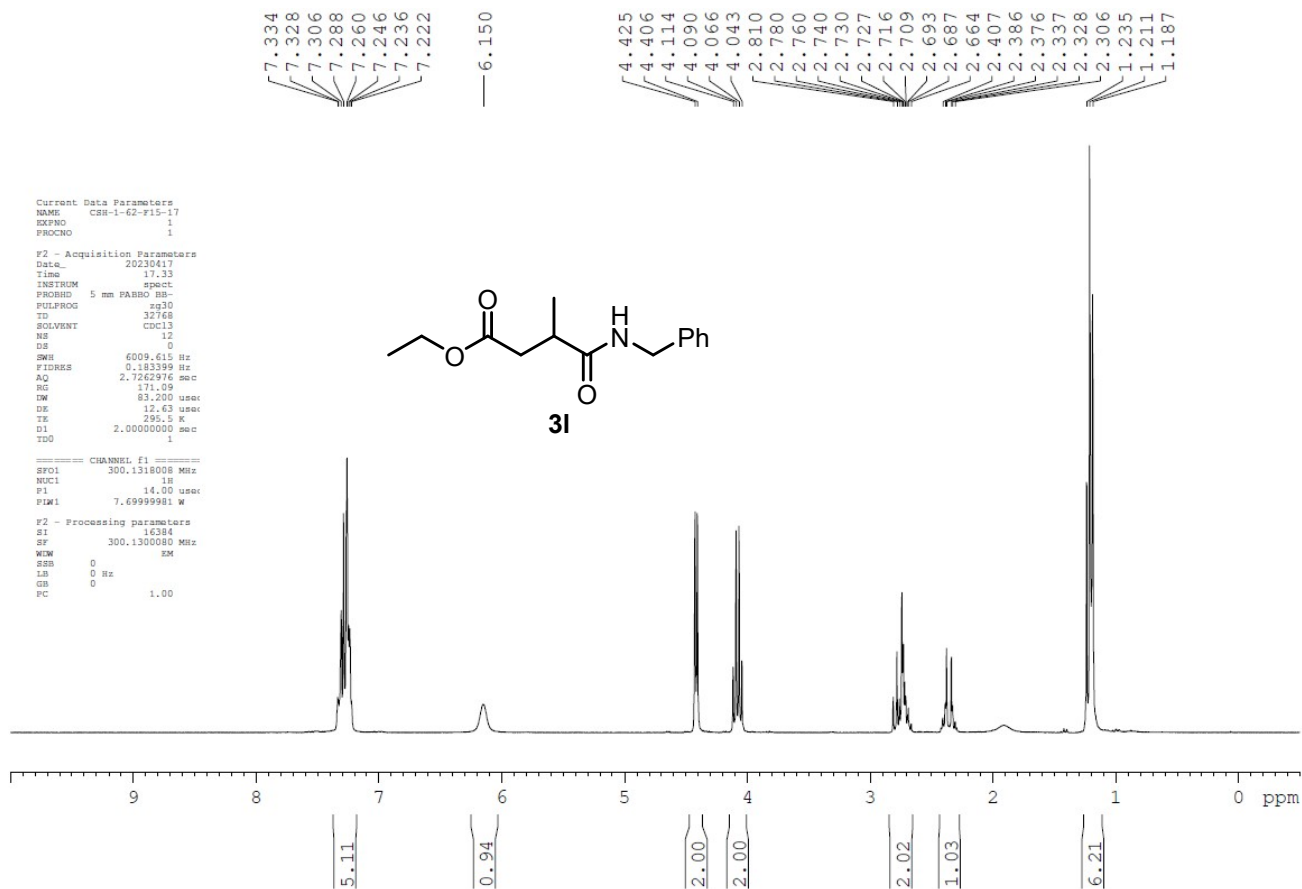

Figure S34. <sup>1</sup>H NMR spectrum of compound **3l** (CDCl<sub>3</sub>, 300 MHz)

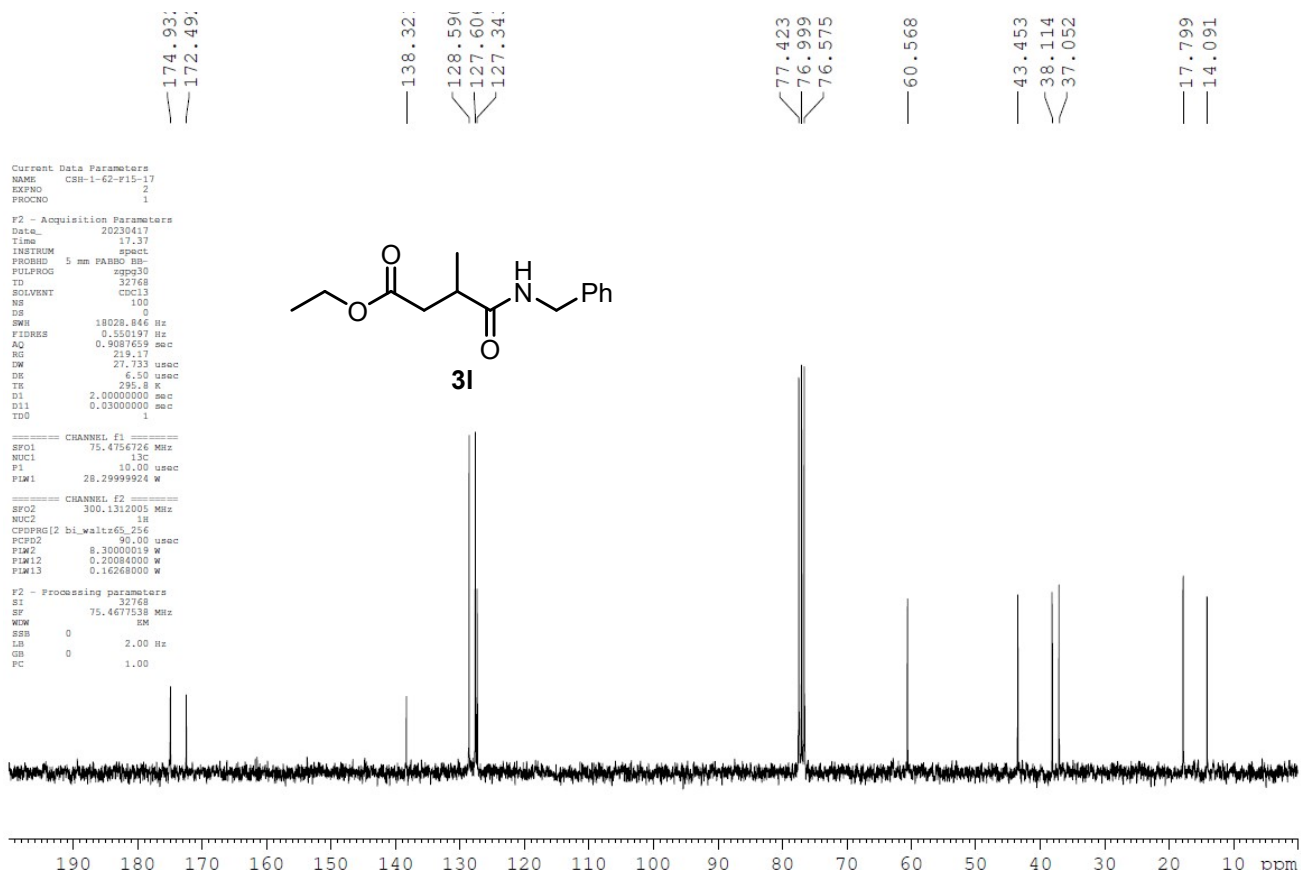

Figure S35. <sup>13</sup>C NMR spectrum of compound **3l** (CDCl<sub>3</sub>, 75 MHz)

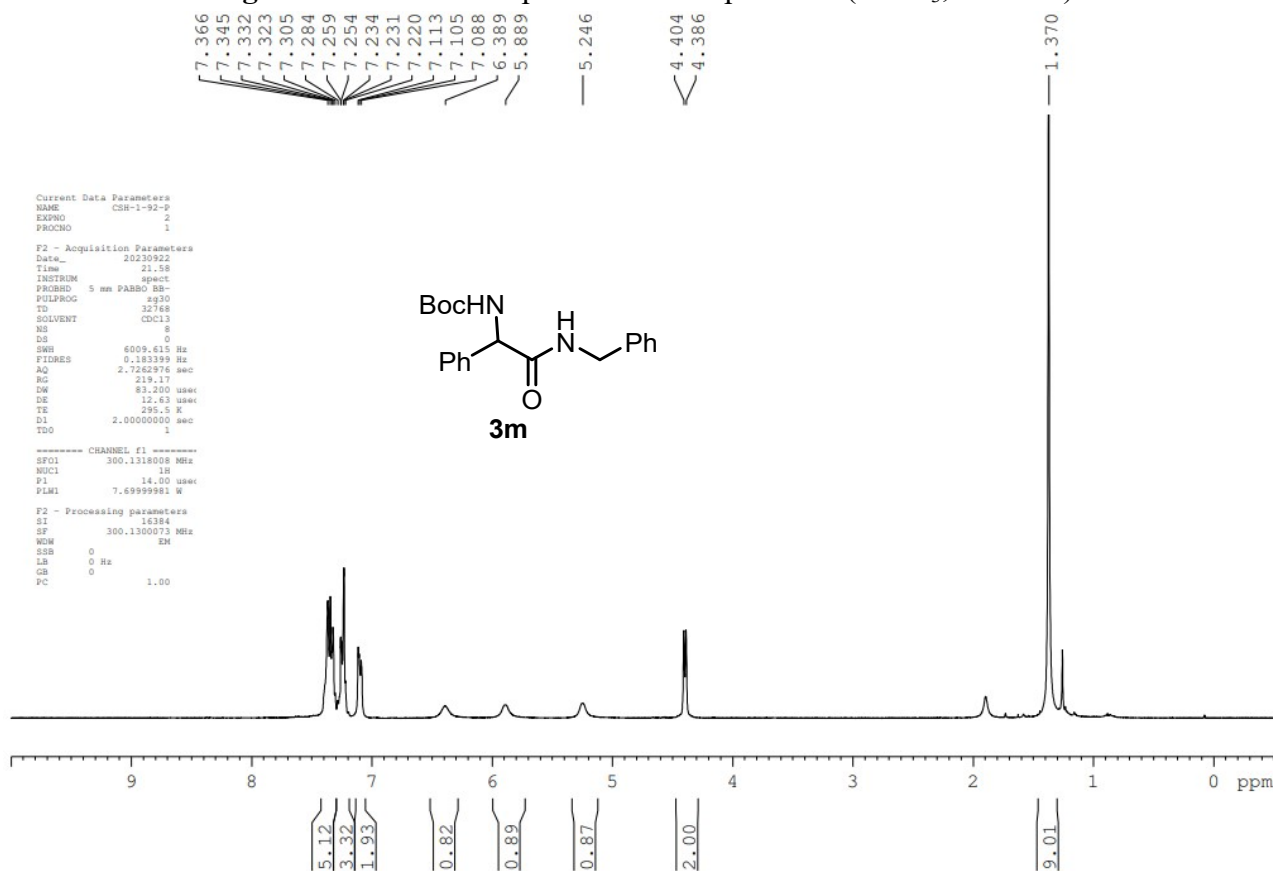

Figure S36. <sup>1</sup>H NMR spectrum of compound **3m** (CDCl<sub>3</sub>, 300 MHz)

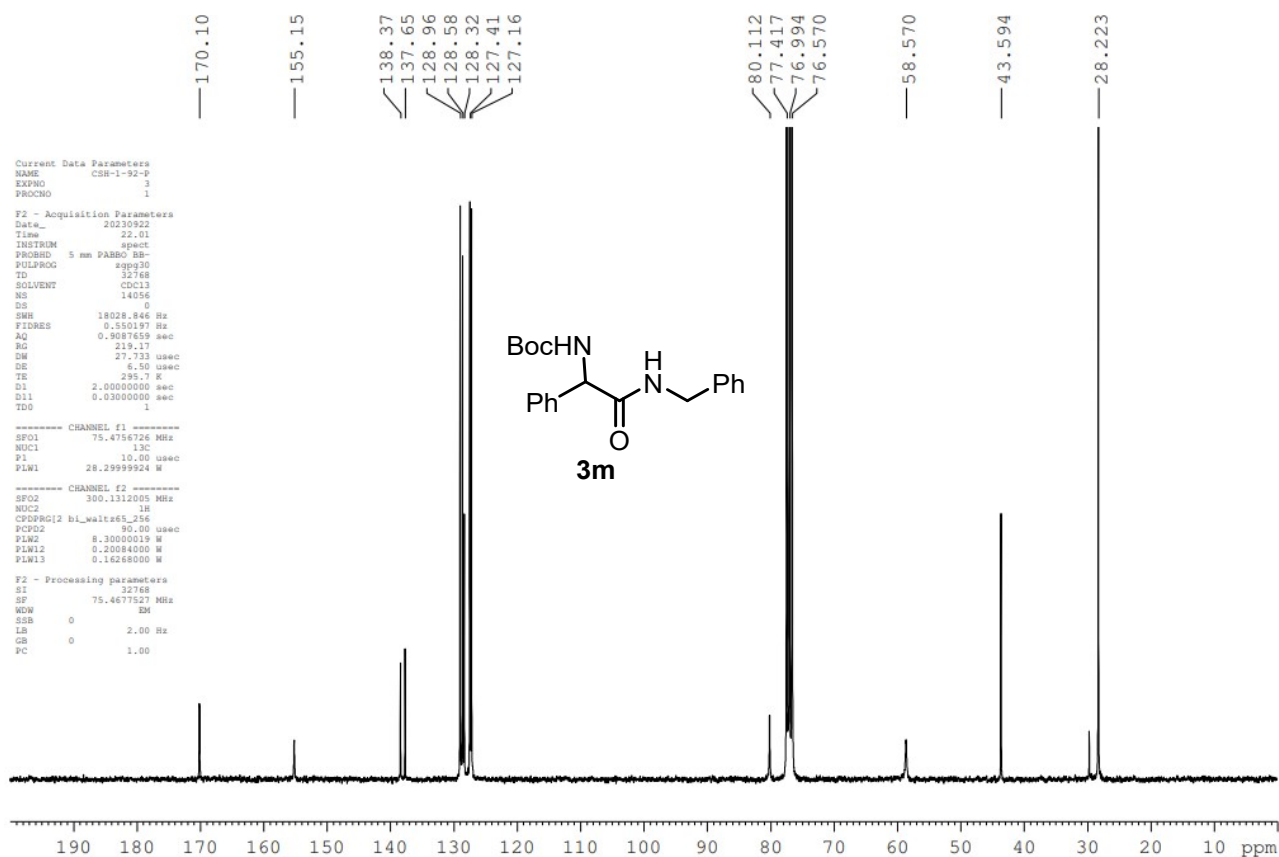

Figure S37. <sup>13</sup>C NMR spectrum of compound **3m** (CDCl<sub>3</sub>, 75 MHz)

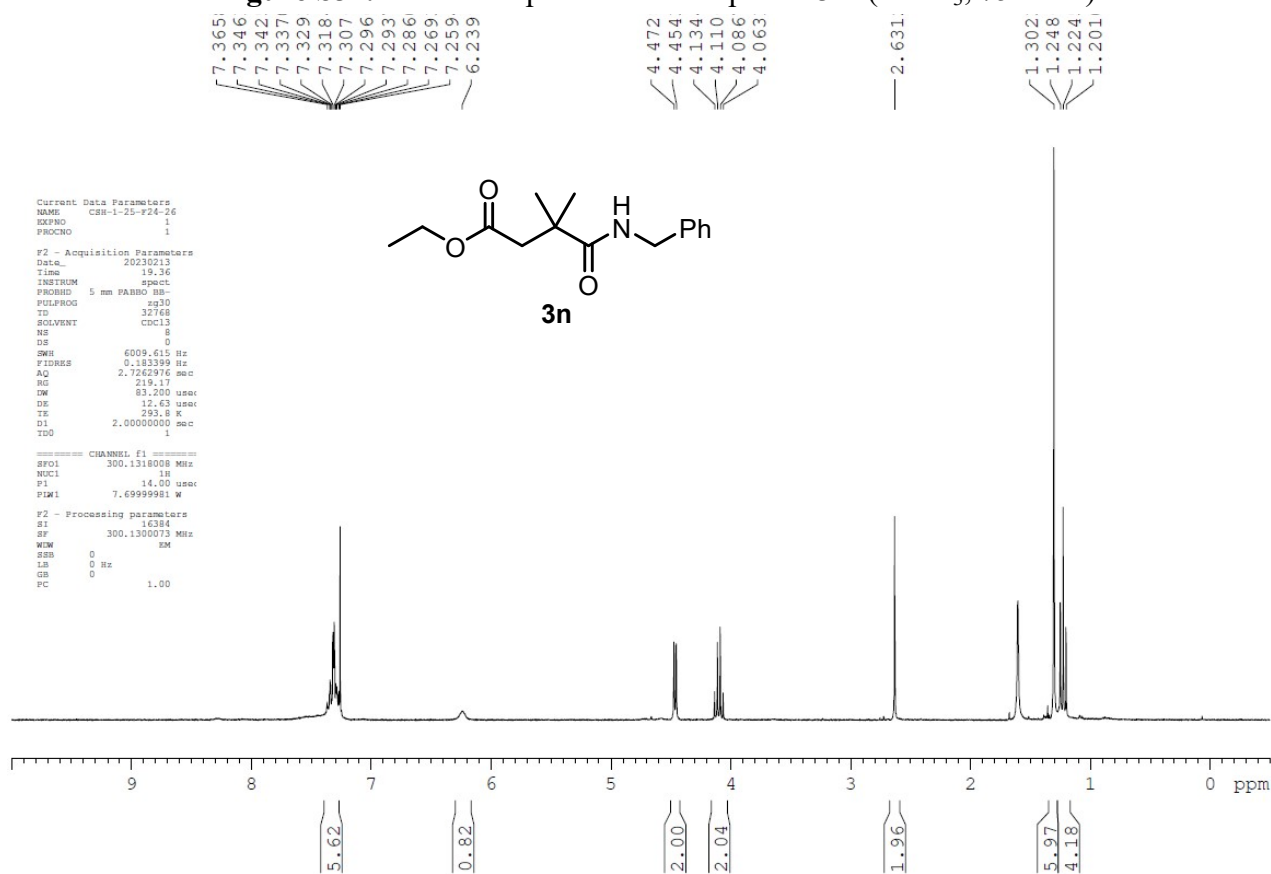

Figure S38. <sup>1</sup>H NMR spectrum of compound **3n** (CDCl<sub>3</sub>, 300 MHz)

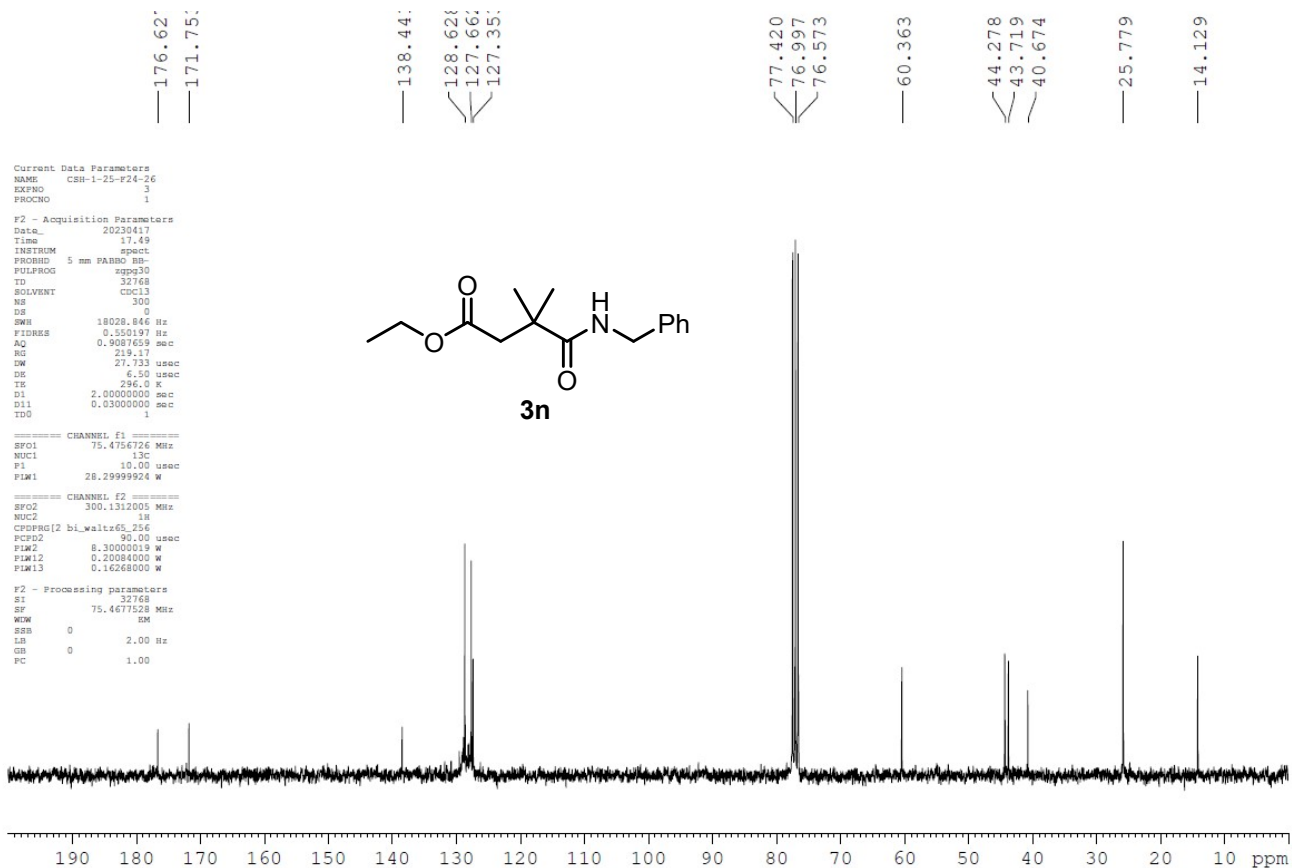

Figure S39. <sup>13</sup>C NMR spectrum of compound **3n** (CDCl<sub>3</sub>, 75 MHz)

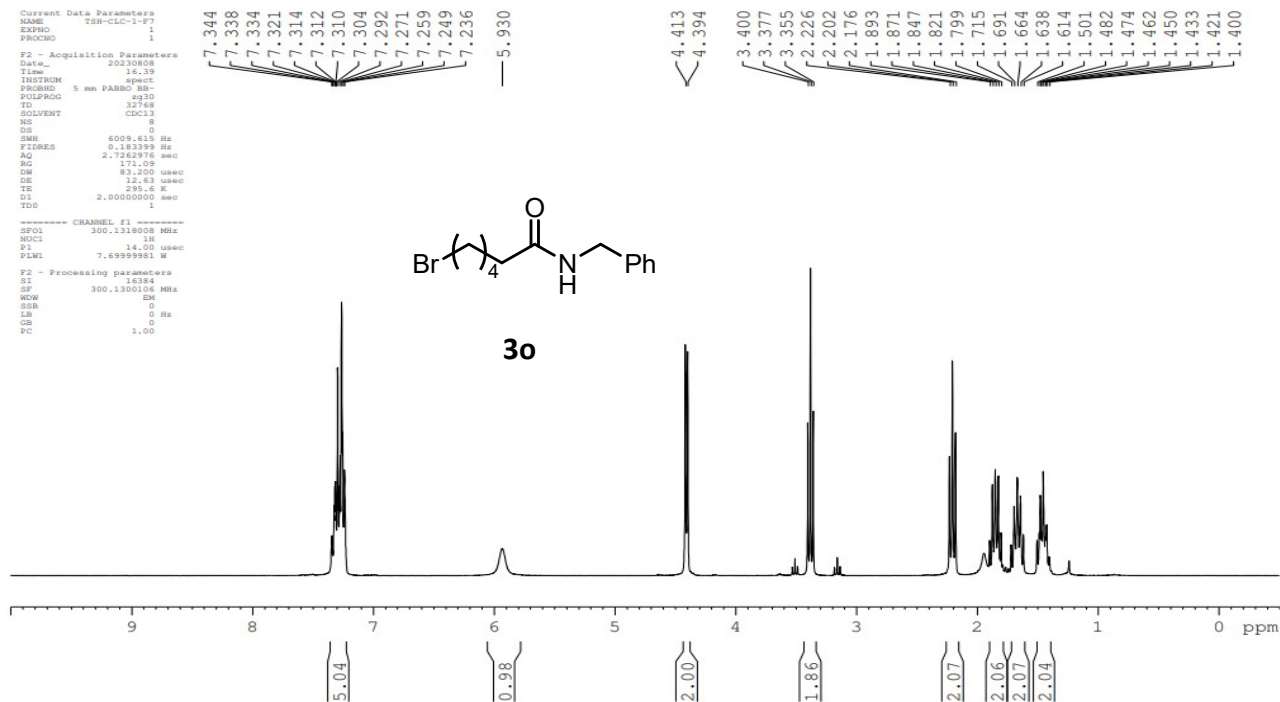

Figure S40. <sup>1</sup>H NMR spectrum of compound **3oe** (CDCl<sub>3</sub>, 300 MHz)

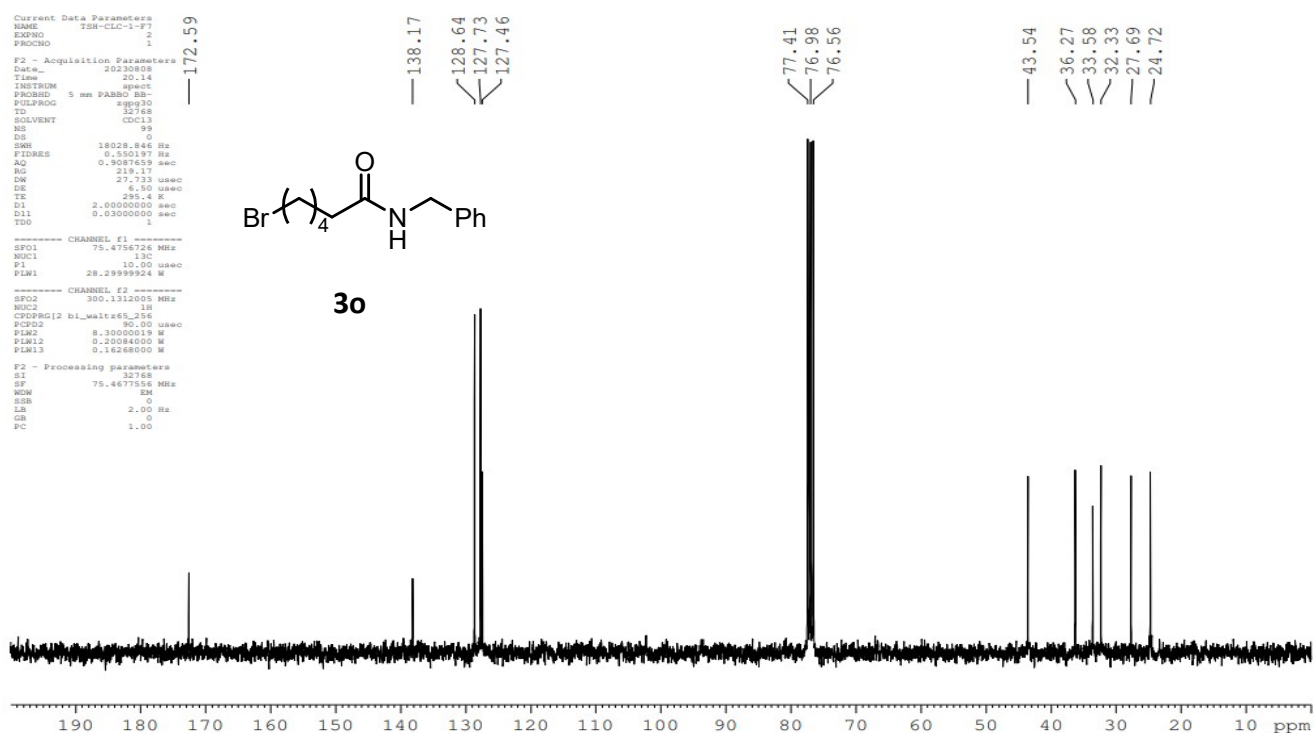

Figure S41.  $^{13}\text{C}$  NMR spectrum of compound **30** ( $\text{CDCl}_3$ , 75 MHz)

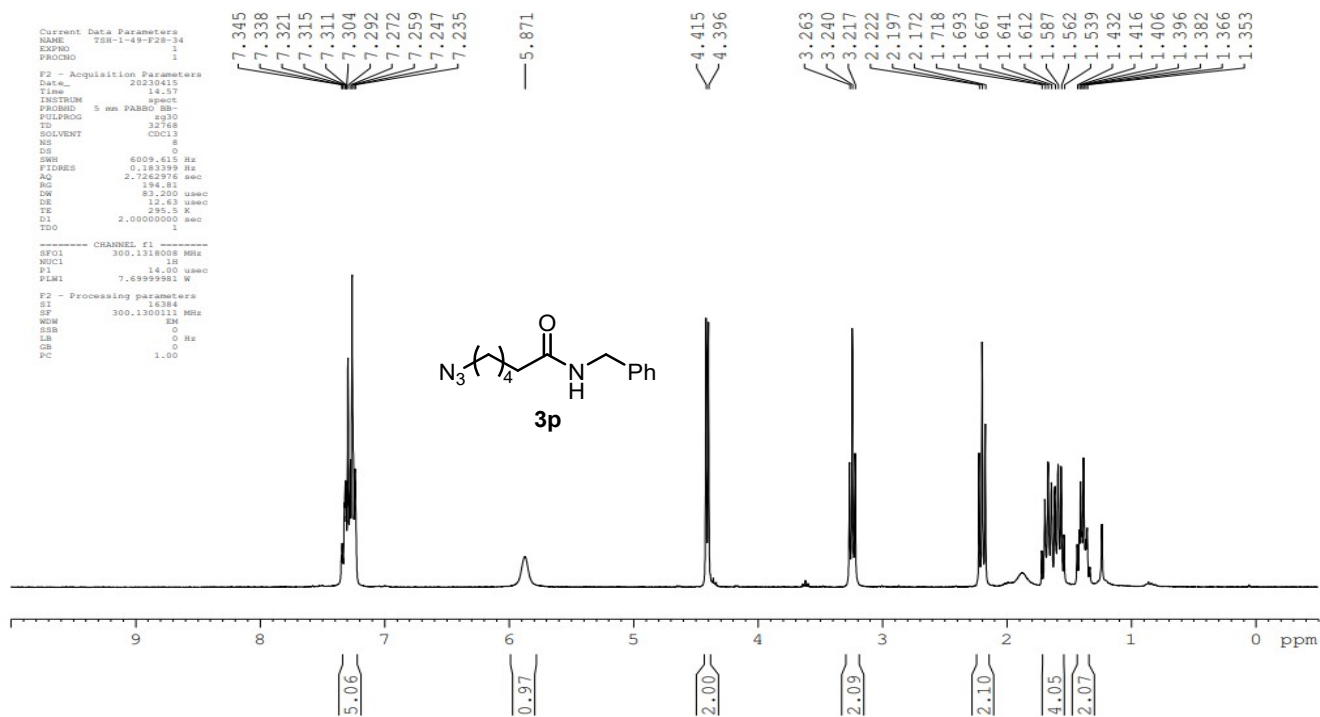

Figure S42.  $^1\text{H}$  NMR spectrum of compound **3p** ( $\text{CDCl}_3$ , 300 MHz)

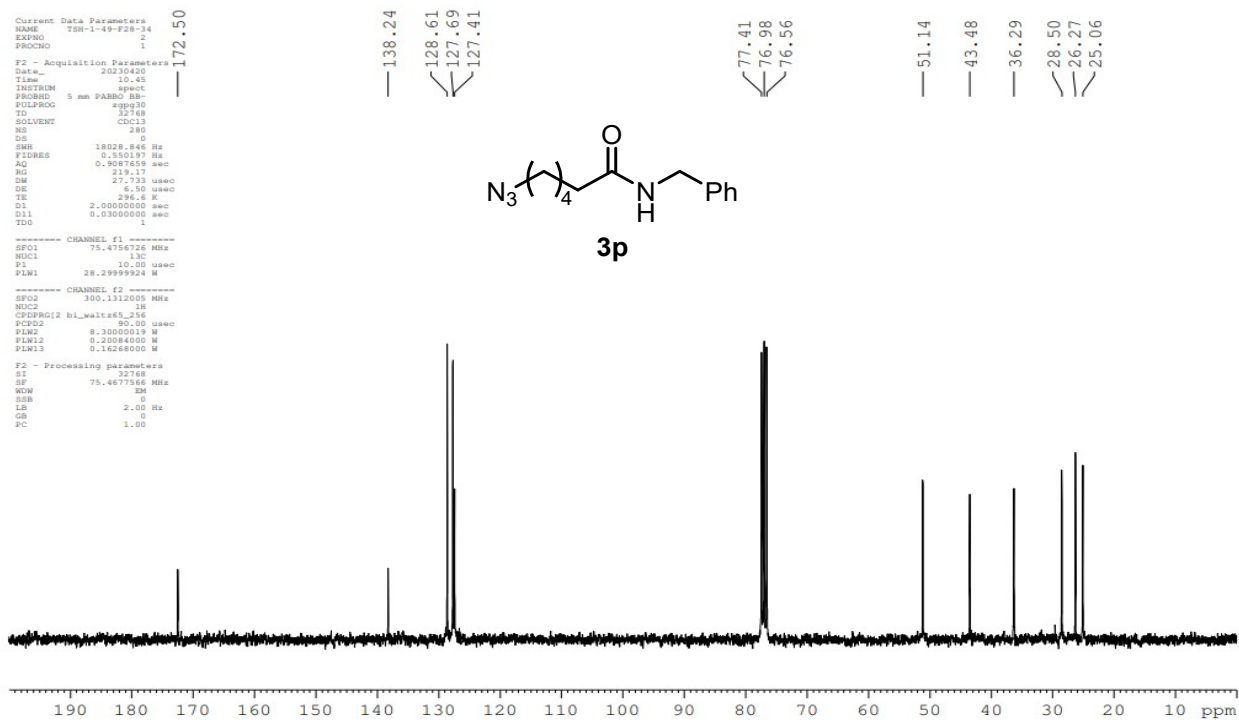

Figure S43. <sup>13</sup>C NMR spectrum of compound **3p** (CDCl<sub>3</sub>, 75 MHz)

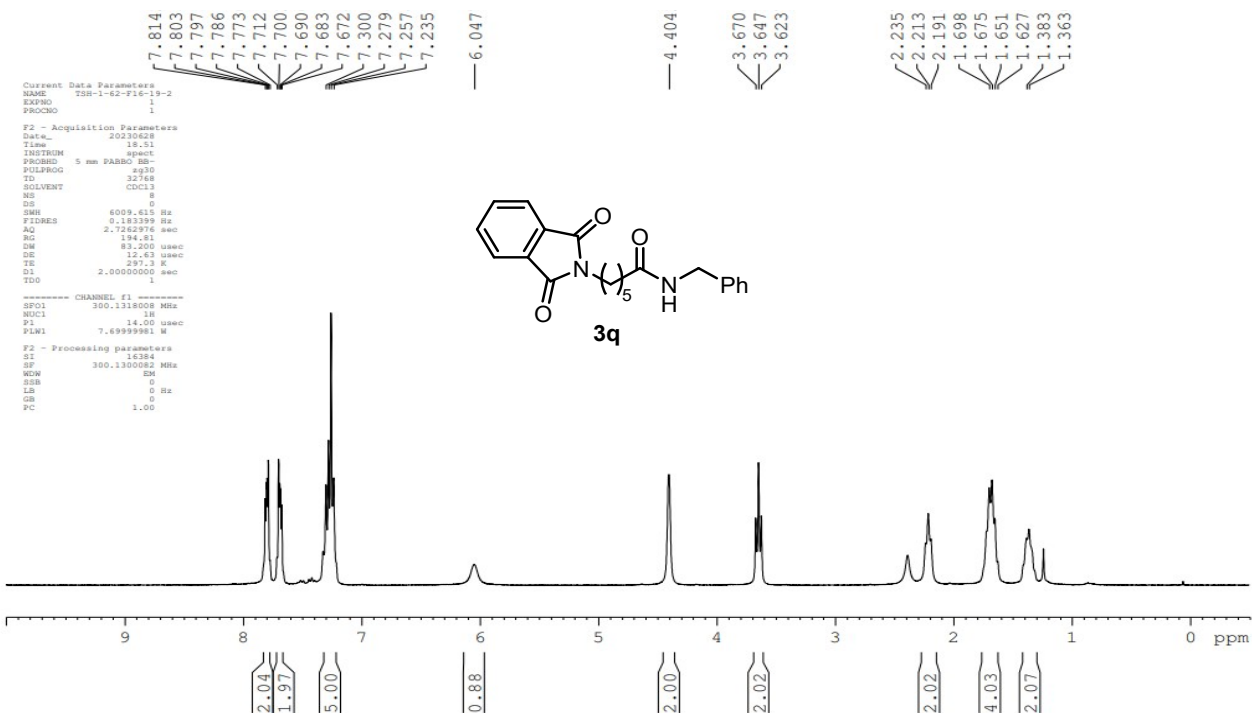

Figure S44. <sup>1</sup>H NMR spectrum of compound **3q** (CDCl<sub>3</sub>, 300 MHz)

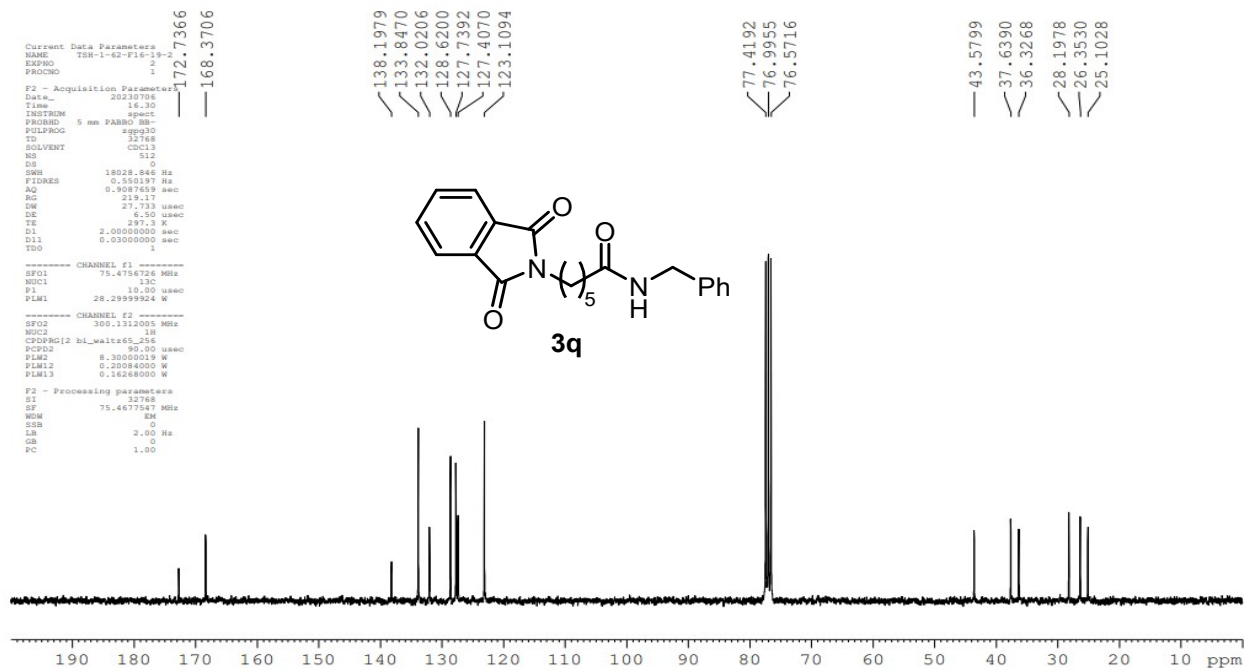

Figure S45.  $^{13}\text{C}$  NMR spectrum of compound **3q** ( $\text{CDCl}_3$ , 75 MHz)

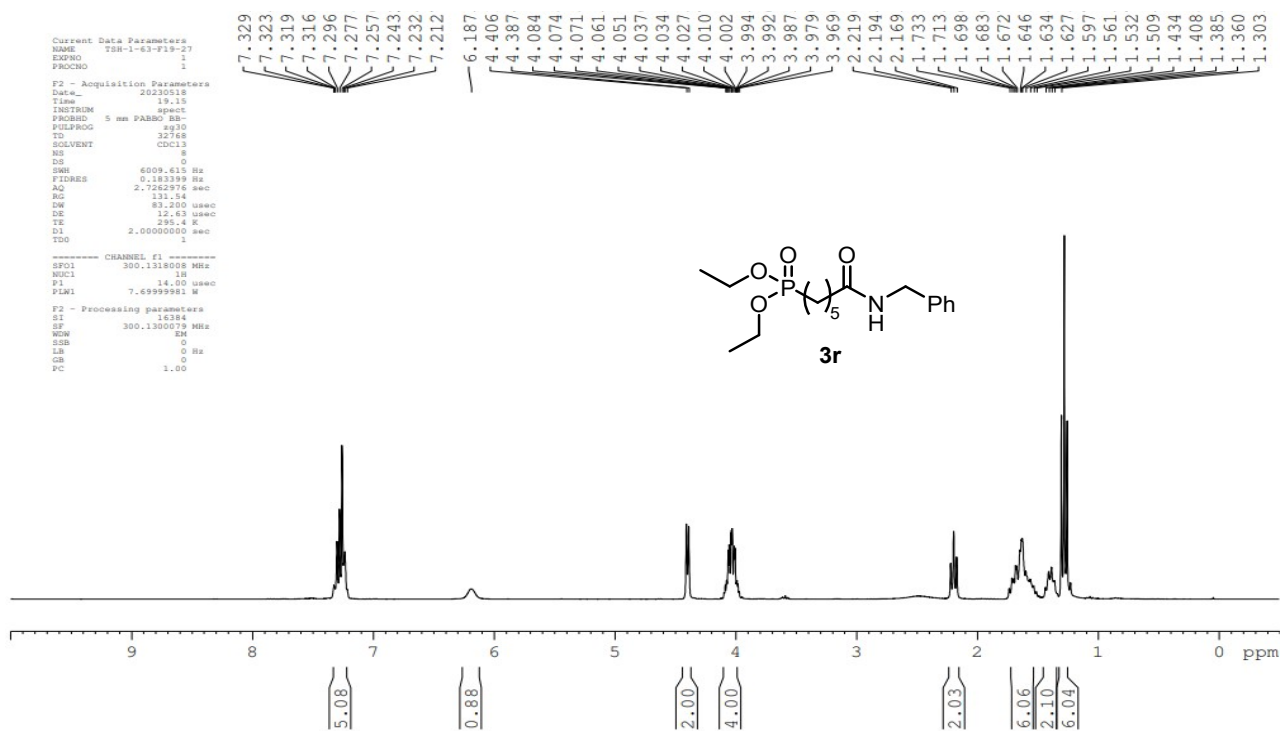

Figure S46.  $^1\text{H}$  NMR spectrum of compound **3r** ( $\text{CDCl}_3$ , 300 MHz)



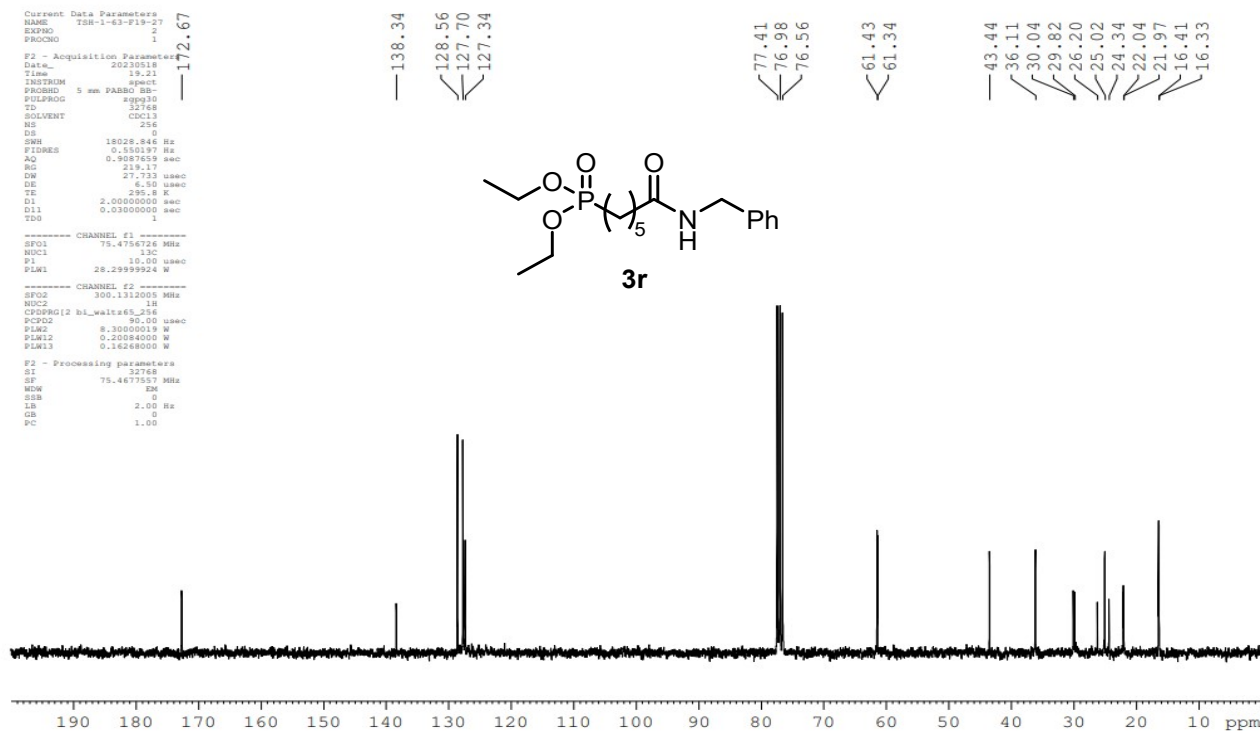

Figure S47. <sup>13</sup>C NMR spectrum of compound **3r** (CDCl<sub>3</sub>, 75 MHz)

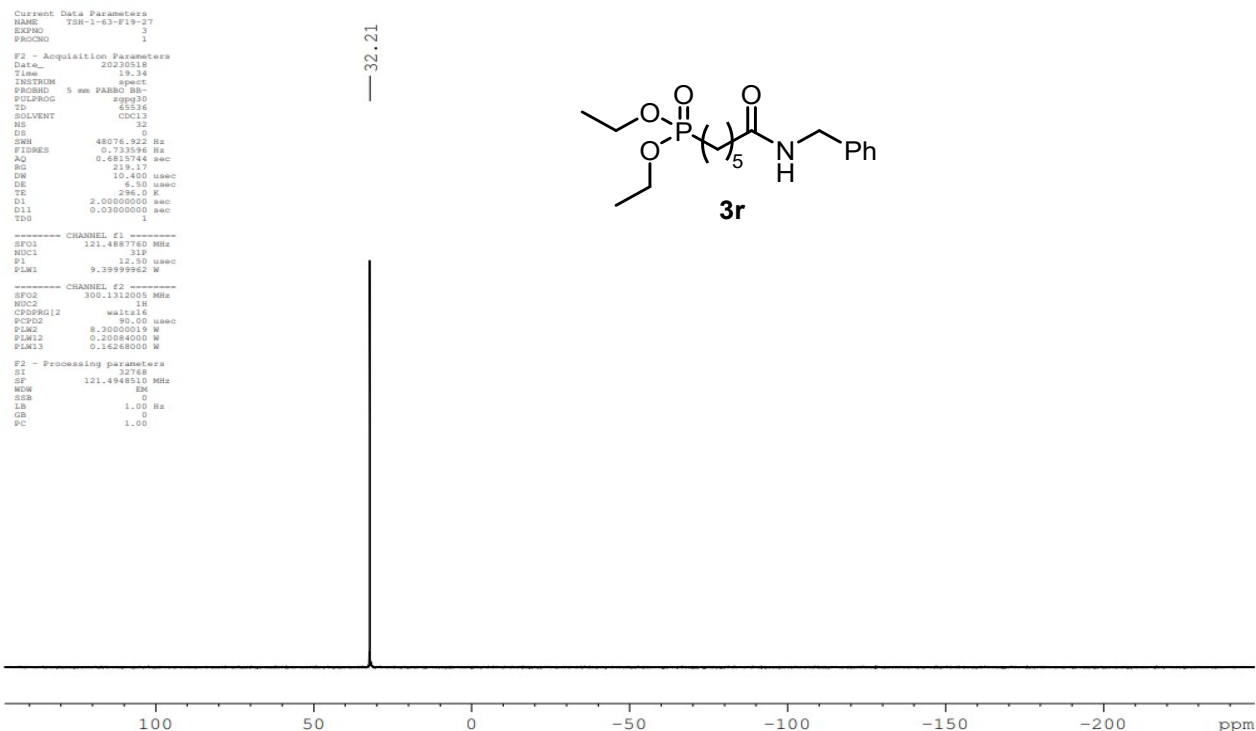

Figure S48. <sup>31</sup>P NMR spectrum of compound **3r** (CDCl<sub>3</sub>, 121 MHz)

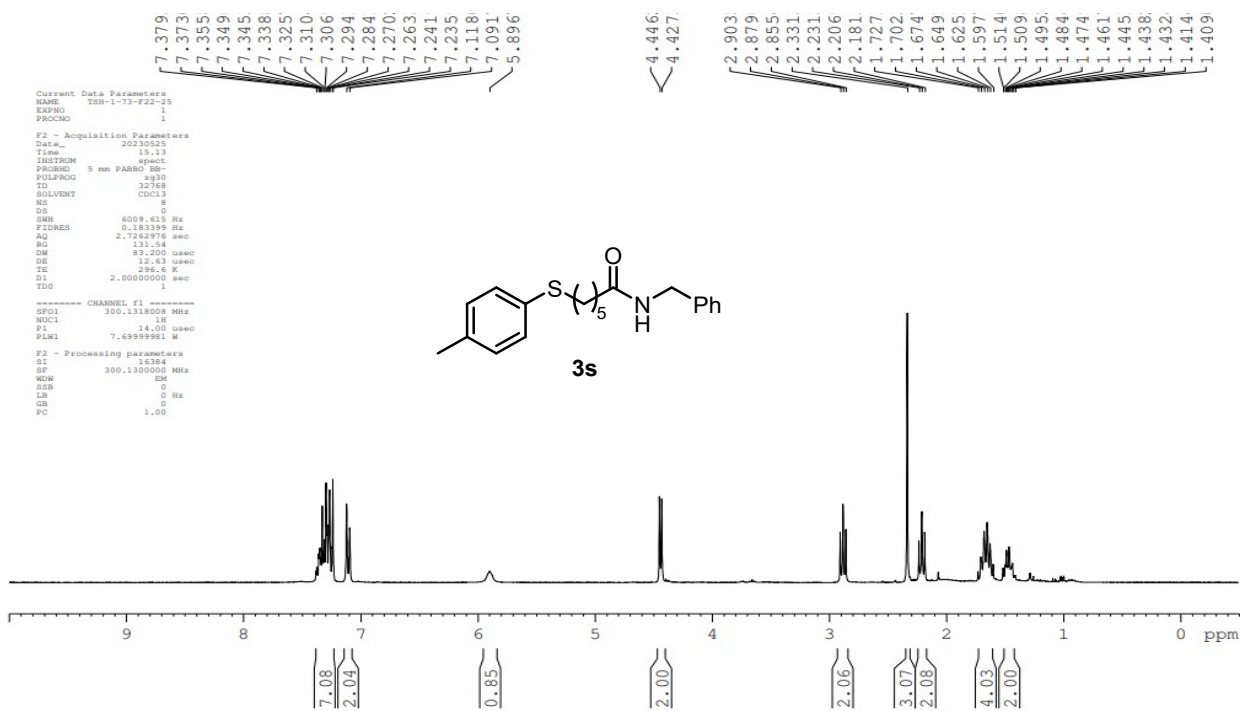

Figure S49. <sup>1</sup>H NMR spectrum of compound **3s** (CDCl<sub>3</sub>, 300 MHz)

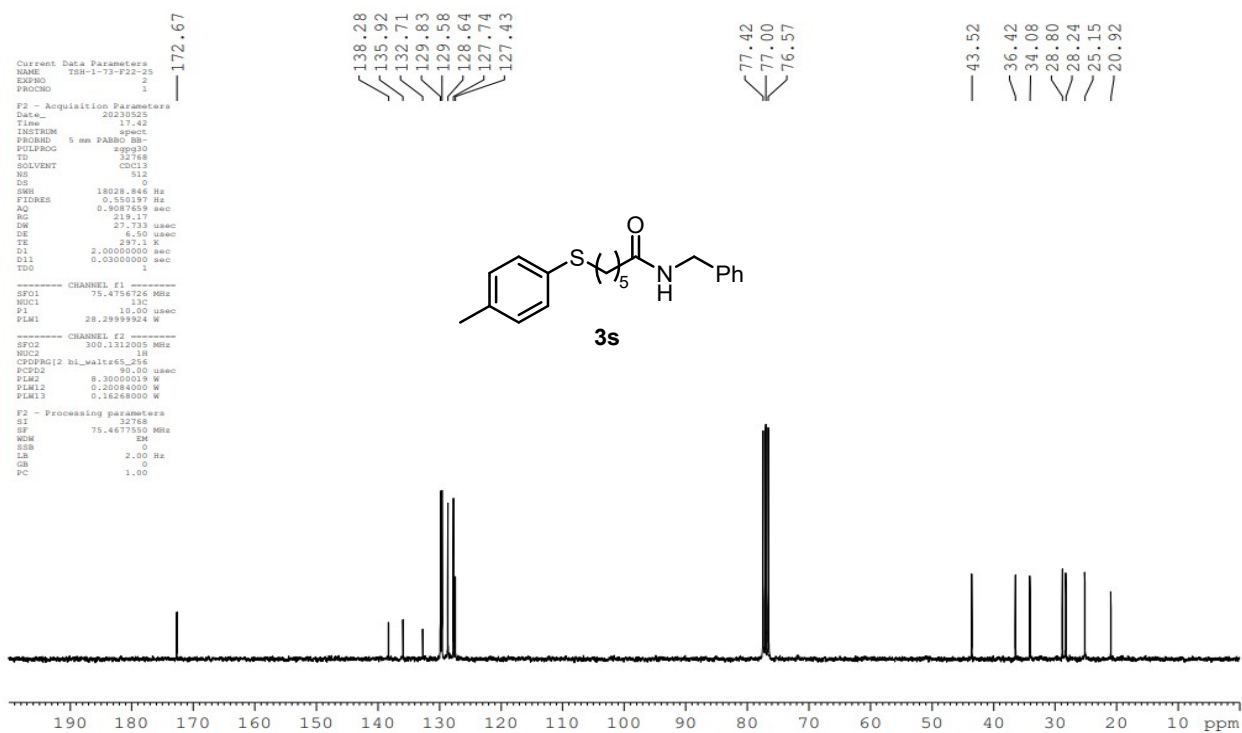

Figure S50. <sup>13</sup>C NMR spectrum of compound **3s** (CDCl<sub>3</sub>, 75 MHz)

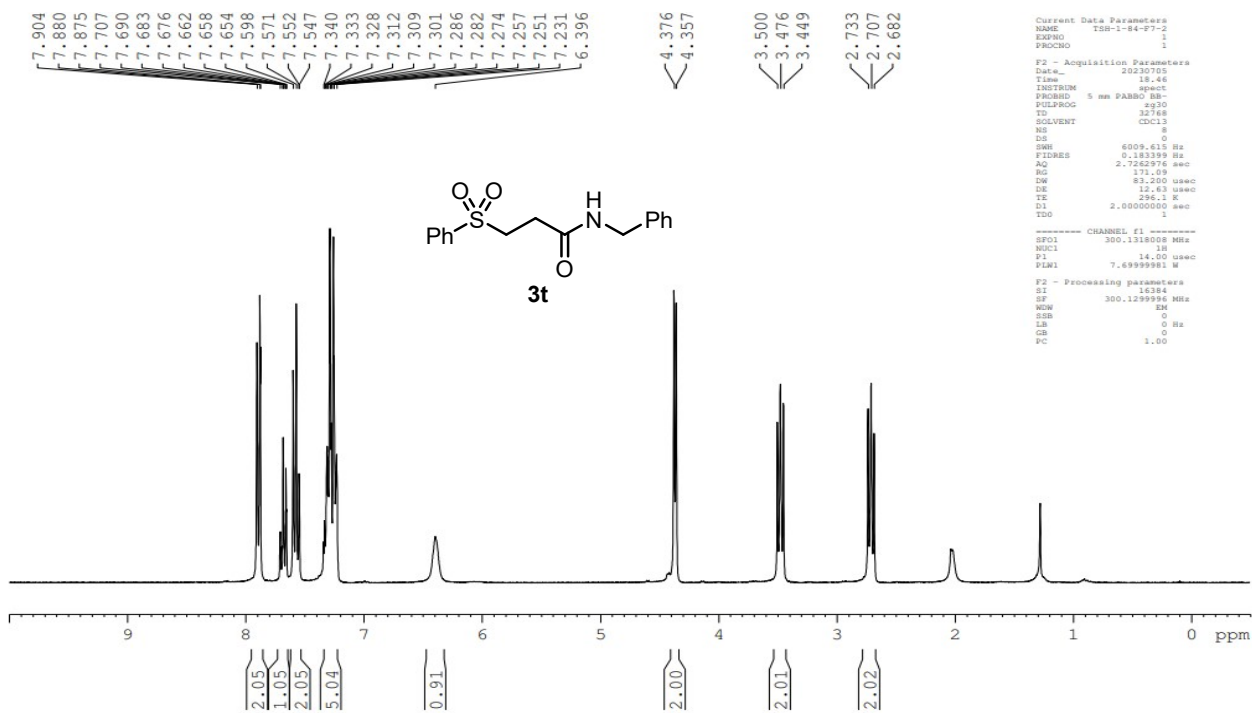

Figure S51. <sup>1</sup>H NMR spectrum of compound **3t** (CDCl<sub>3</sub>, 300 MHz)

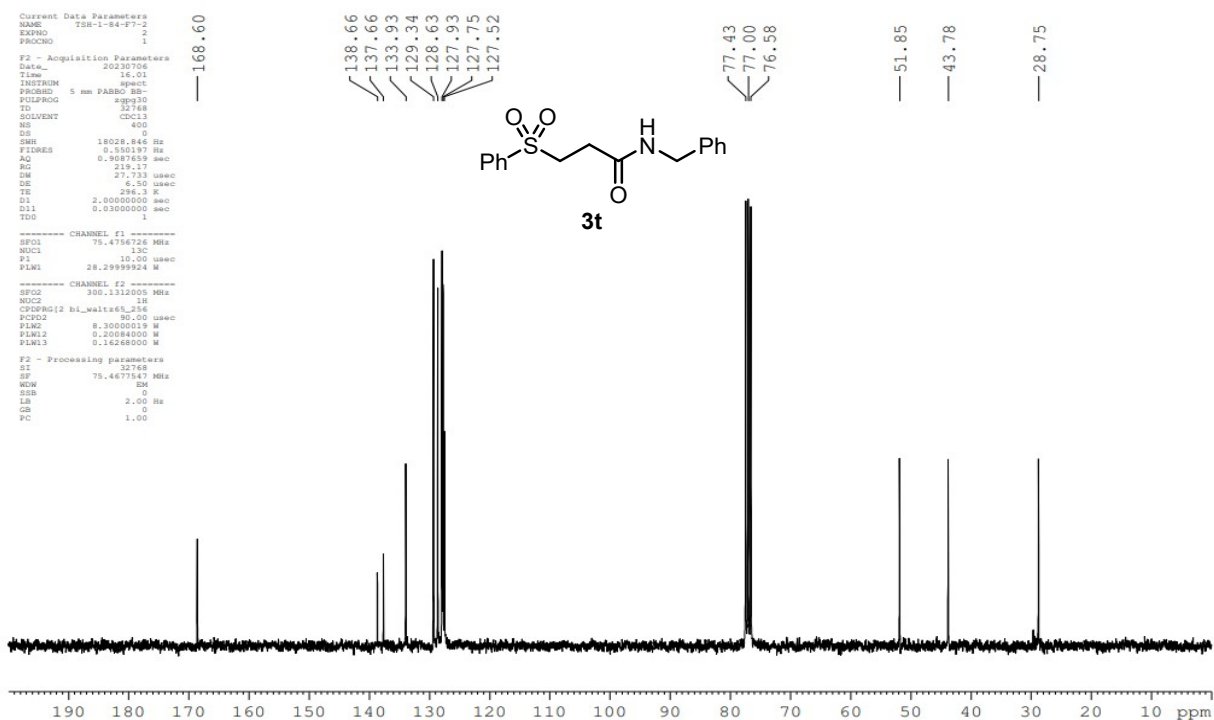

Figure S52. <sup>13</sup>C NMR spectrum of compound **3t** (CDCl<sub>3</sub>, 75 MHz)

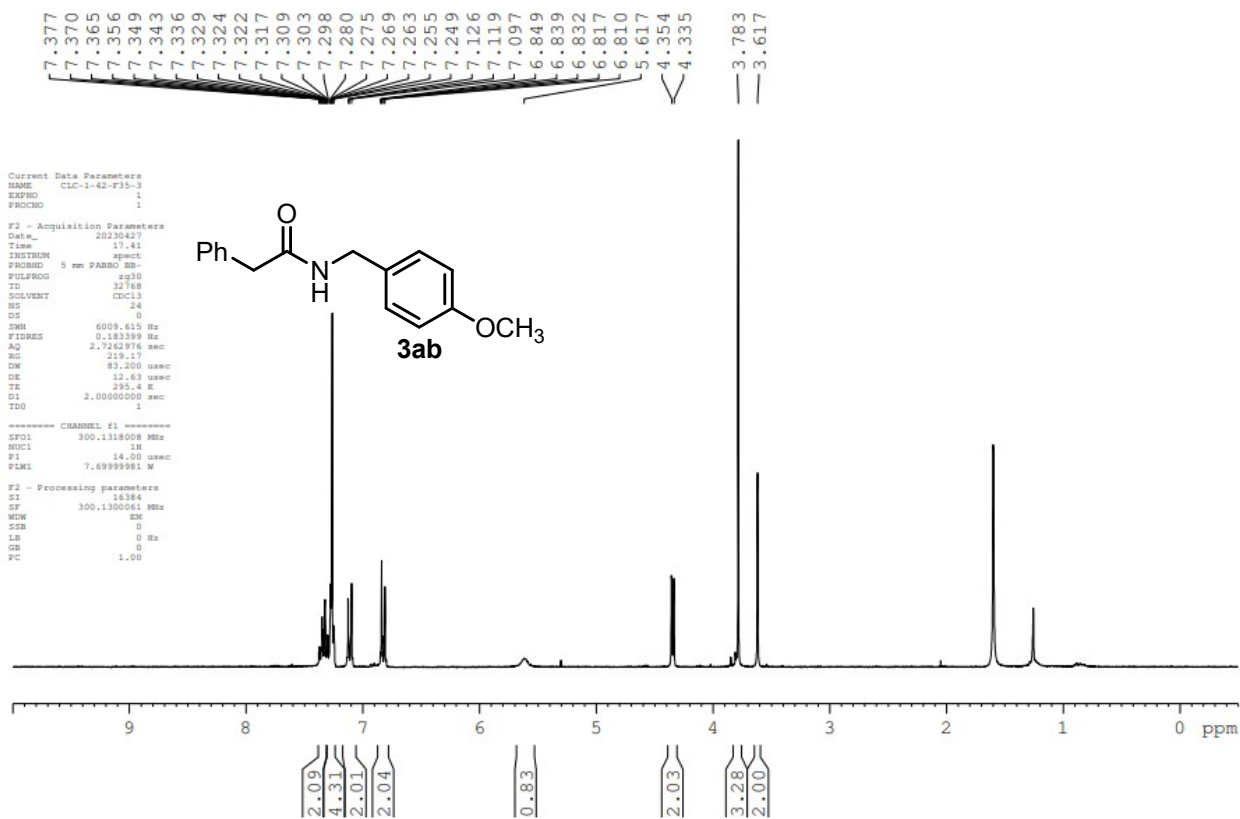

Figure S53. <sup>1</sup>H NMR spectrum of compound **3ab** (CDCl<sub>3</sub>, 300 MHz)

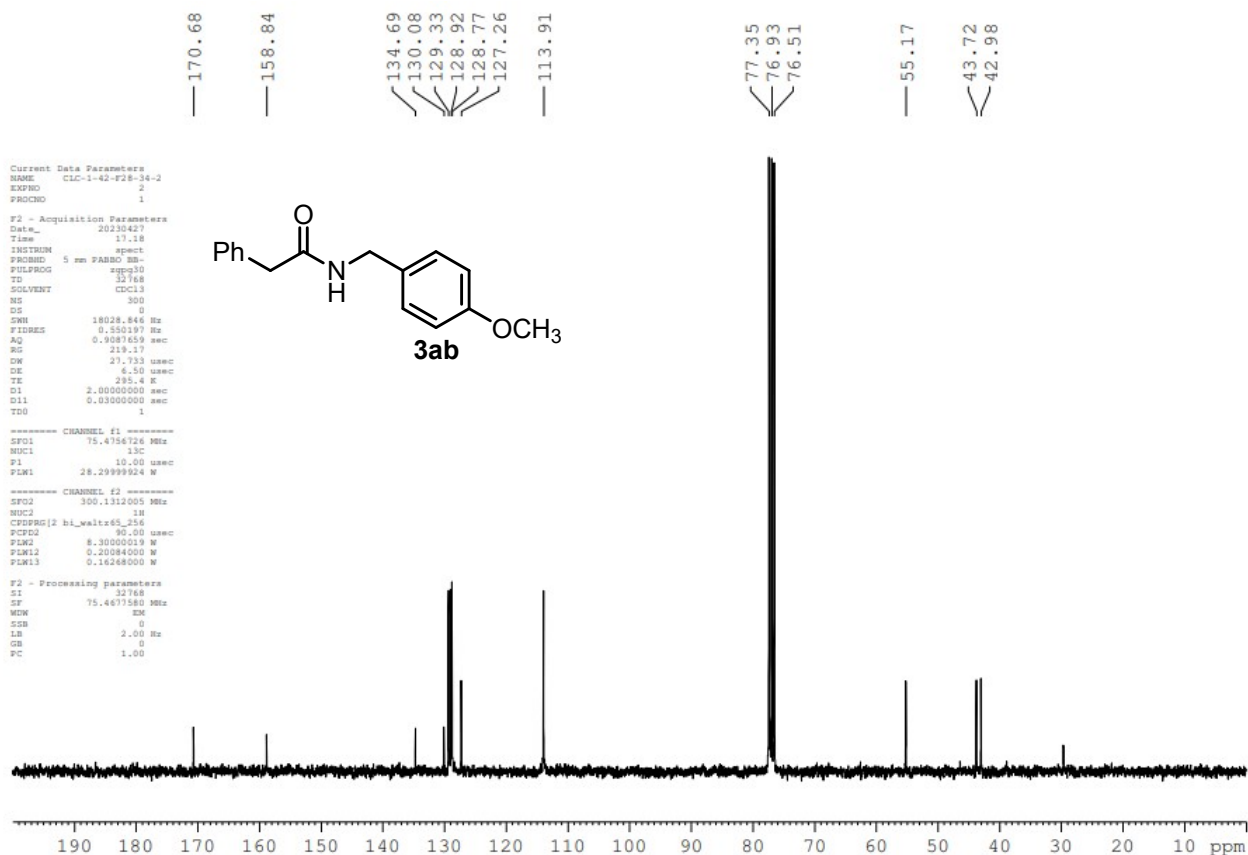

Figure S54. <sup>13</sup>C NMR spectrum of compound **3ab** (CDCl<sub>3</sub>, 75 MHz)

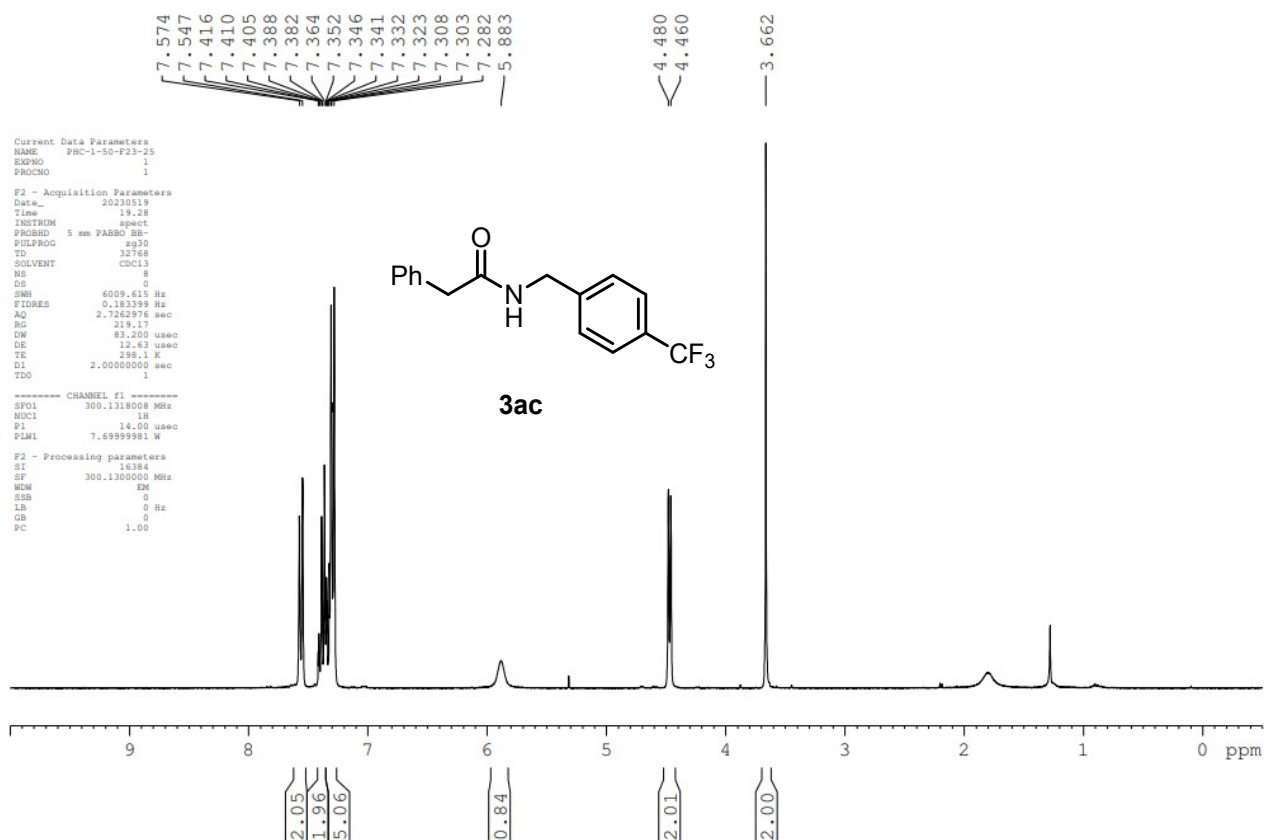

Figure S55. <sup>1</sup>H NMR spectrum of compound **3ac** (CDCl<sub>3</sub>, 300 MHz)

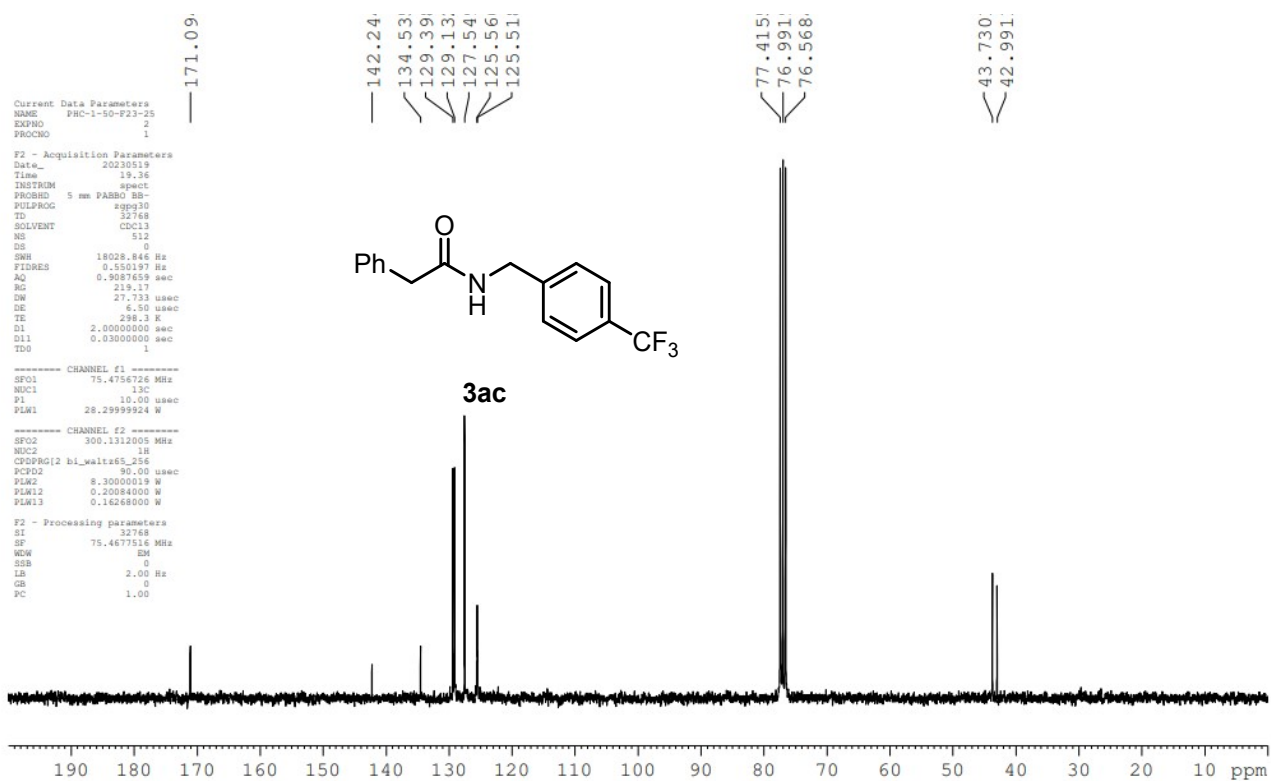

Figure S56. <sup>13</sup>C NMR spectrum of compound **3ac** (CDCl<sub>3</sub>, 75 MHz)

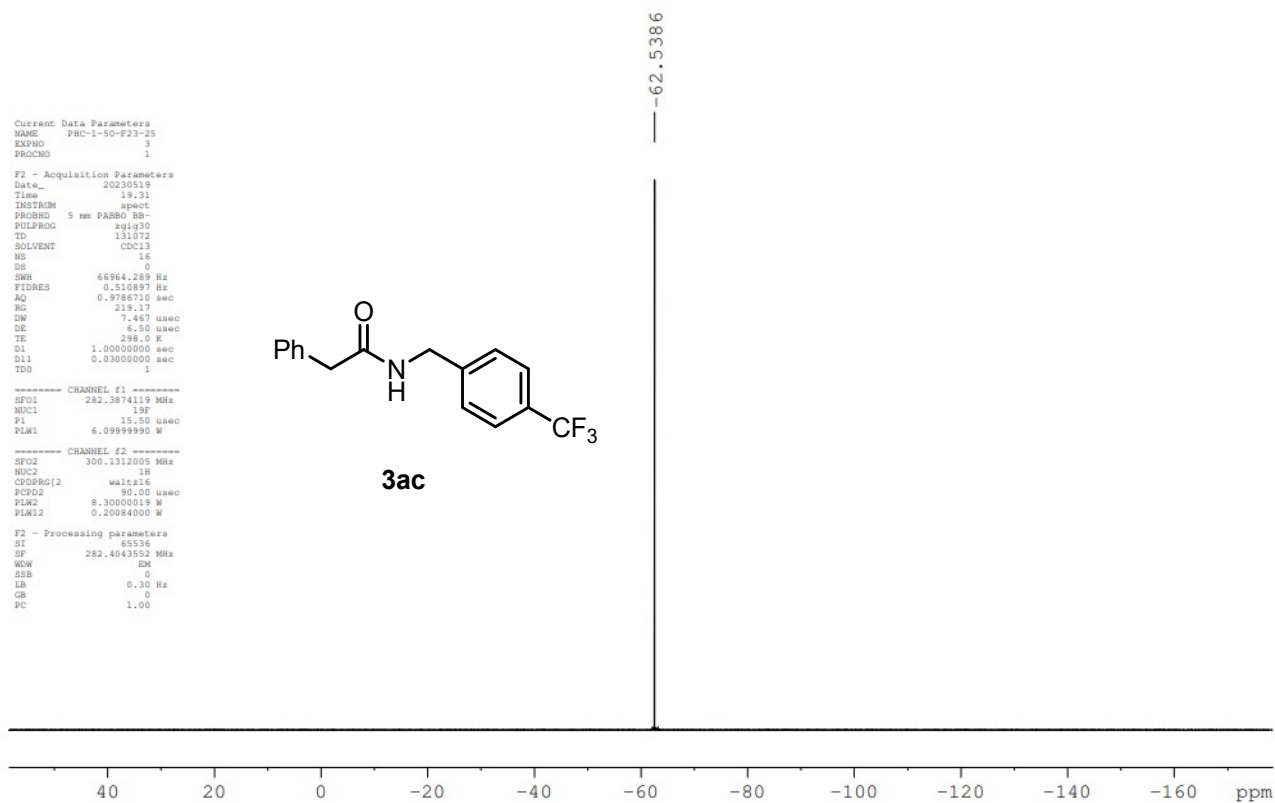

Figure S57. <sup>19</sup>F NMR spectrum of compound **3ac** (CDCl<sub>3</sub>, 282 MHz)

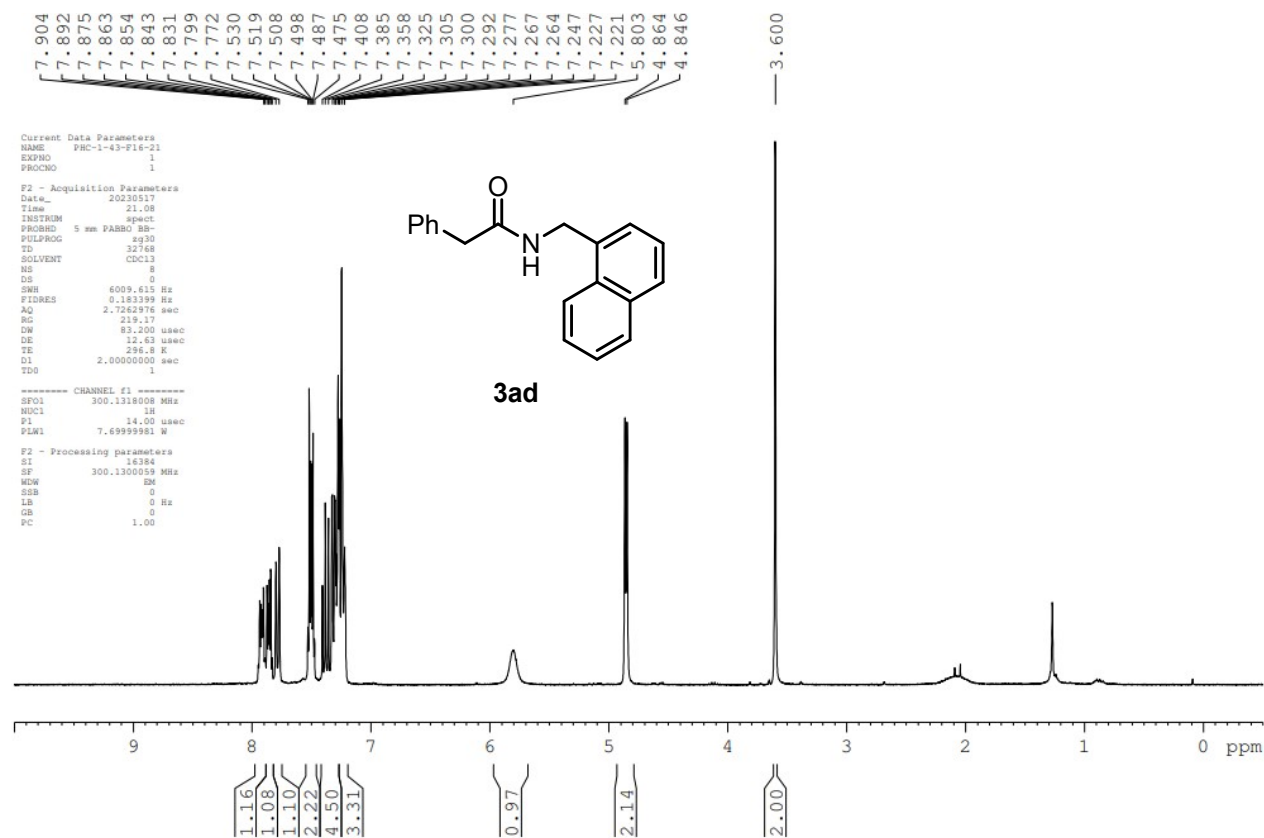

Figure S58. <sup>1</sup>H NMR spectrum of compound **3ad** (CDCl<sub>3</sub>, 300 MHz)

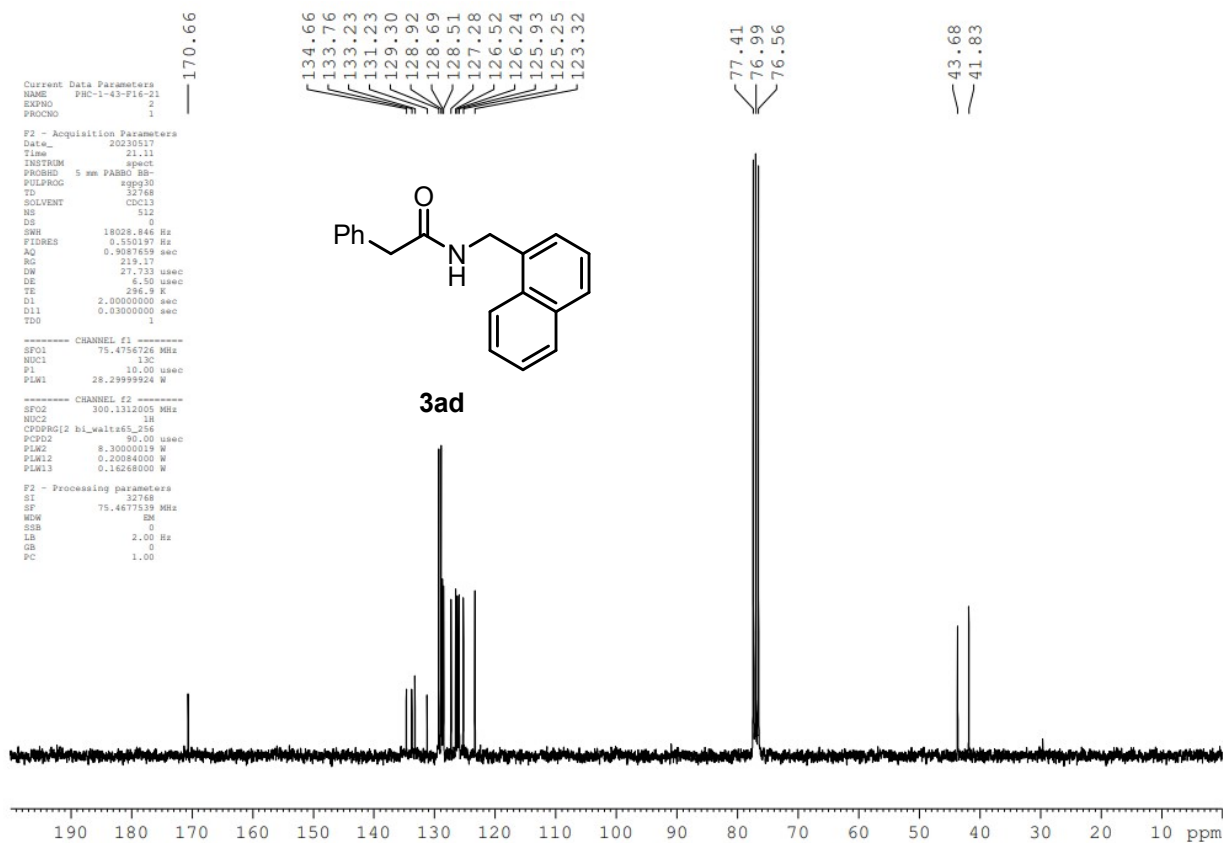

Figure S59. <sup>13</sup>C NMR spectrum of compound **3ad** (CDCl<sub>3</sub>, 75 MHz)

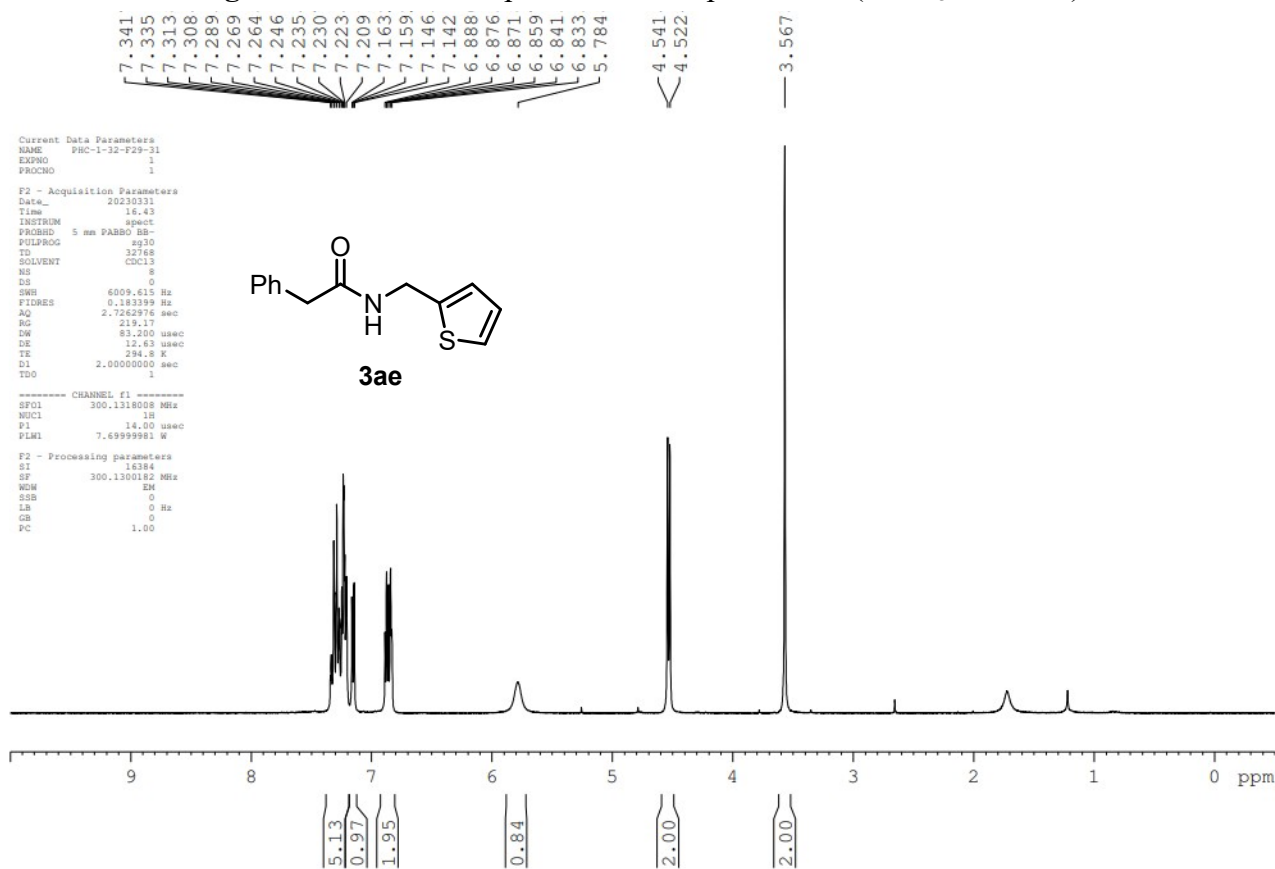

Figure S60. <sup>1</sup>H NMR spectrum of compound **3ae** (CDCl<sub>3</sub>, 300 MHz)

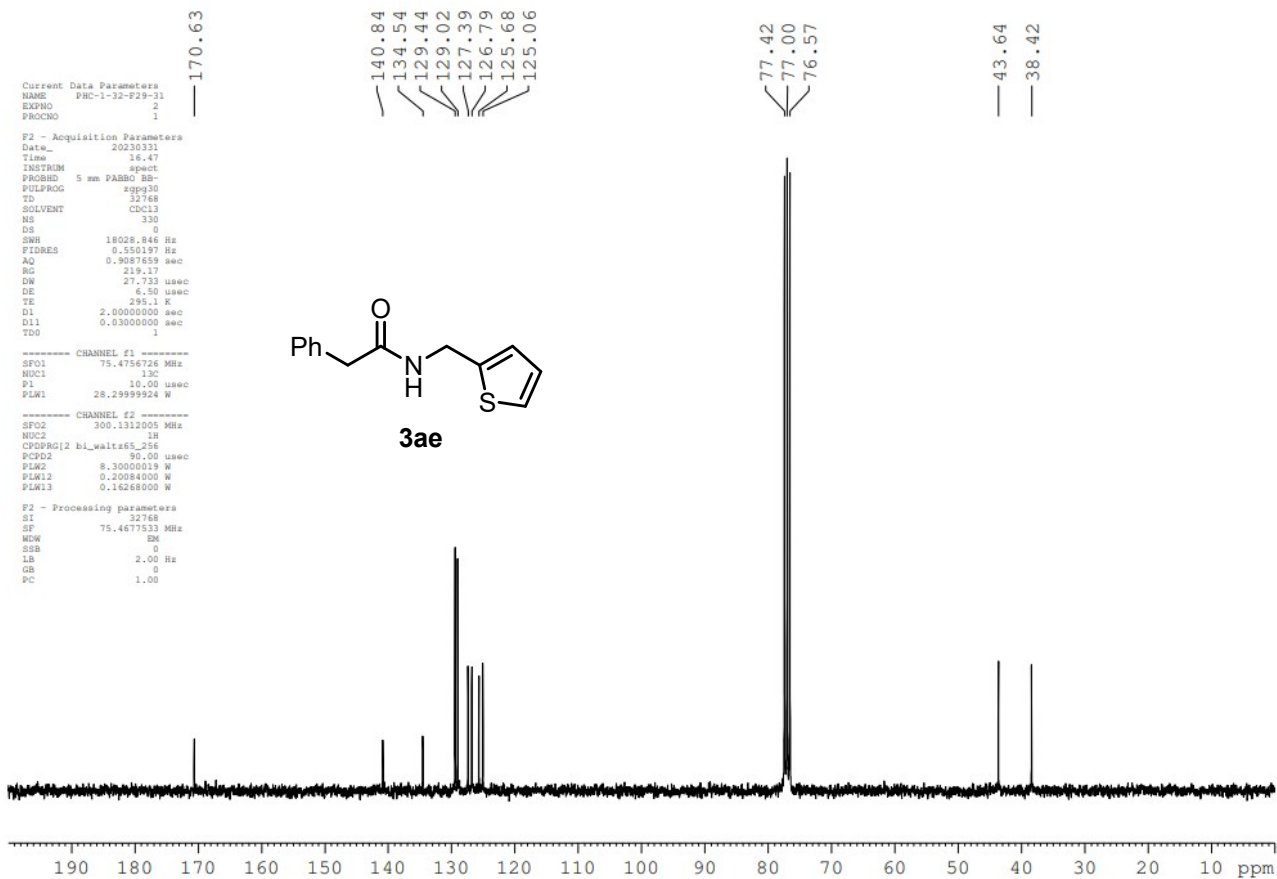

Figure S61. <sup>13</sup>C NMR spectrum of compound **3ae** (CDCl<sub>3</sub>, 75 MHz)

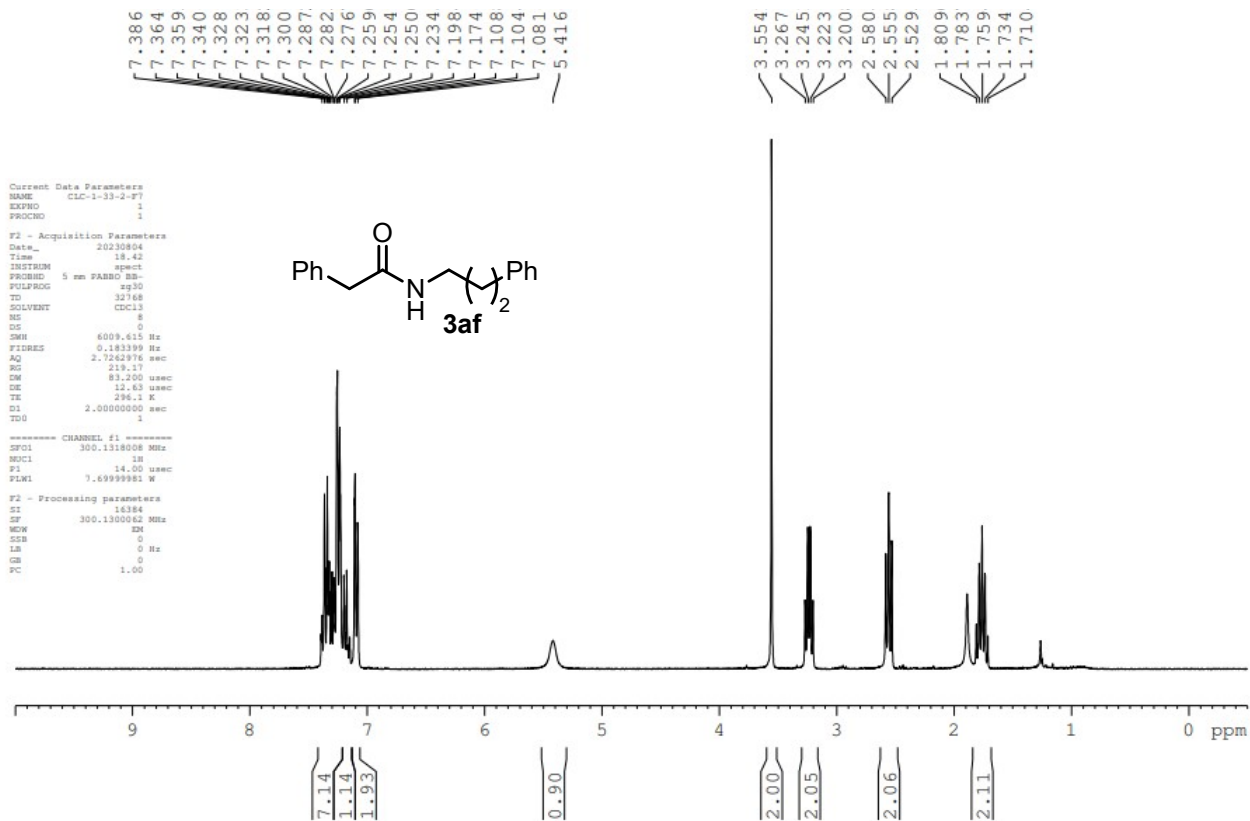



**Figure S62.** <sup>1</sup>H NMR spectrum of compound **3af** (CDCl<sub>3</sub>, 300 MHz)

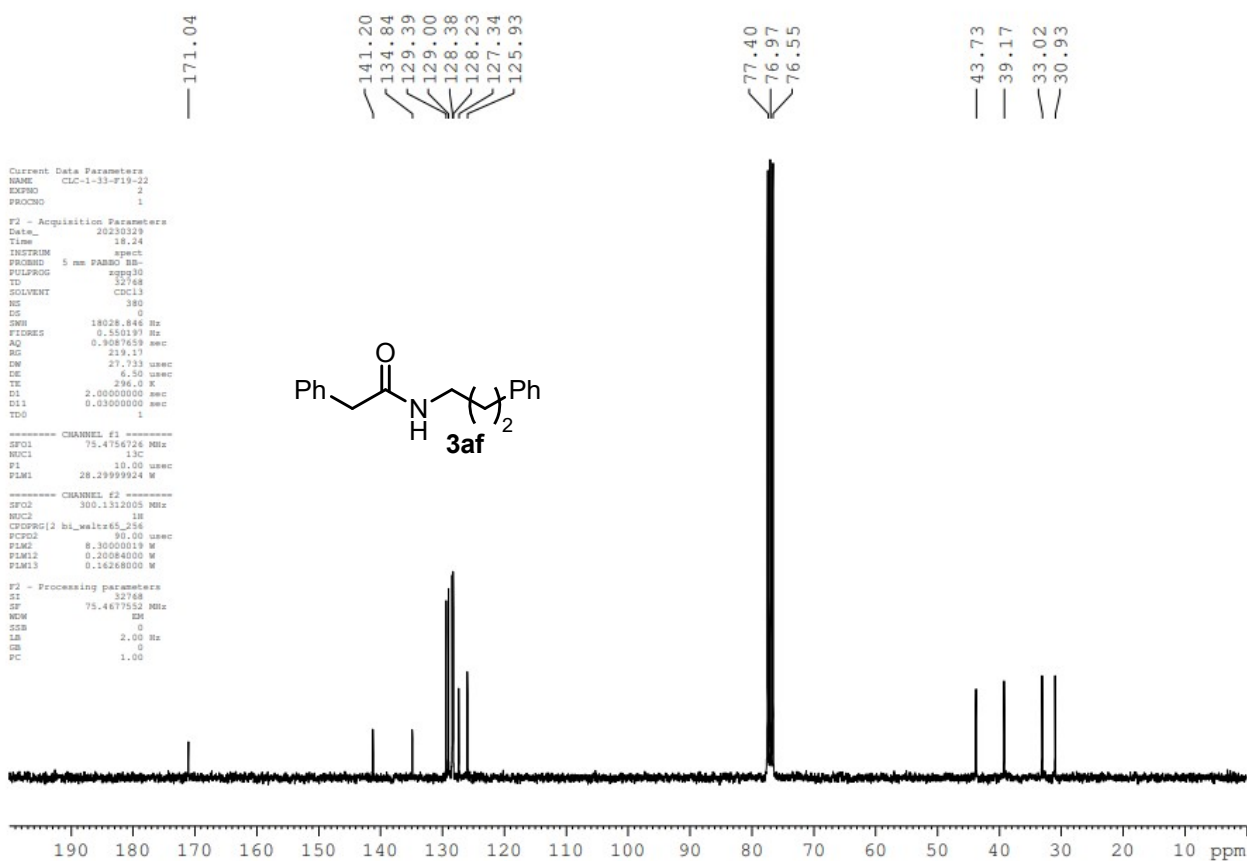

**Figure S63.** <sup>13</sup>C NMR spectrum of compound **3ag** (CDCl<sub>3</sub>, 75 MHz)

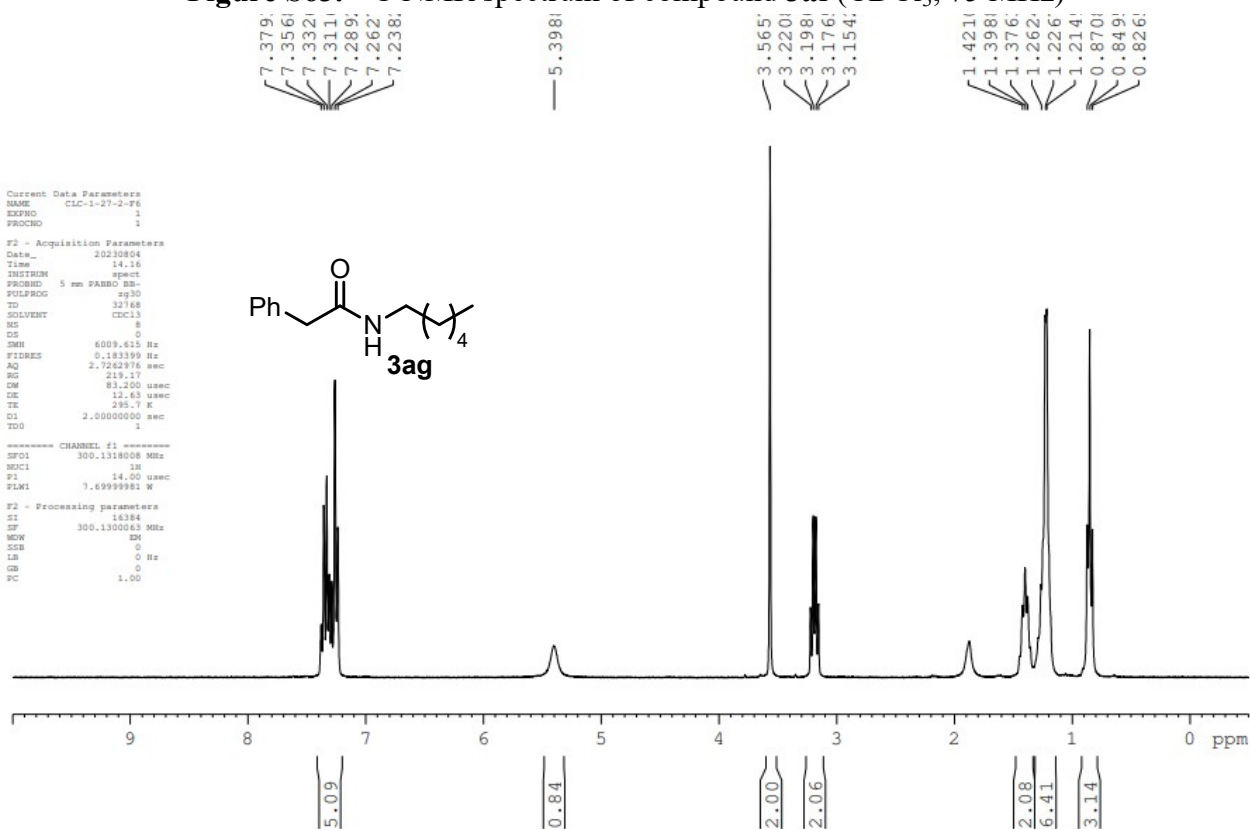

**Figure S64.**  $^1\text{H}$  NMR spectrum of compound **3ag** ( $\text{CDCl}_3$ , 300 MHz)

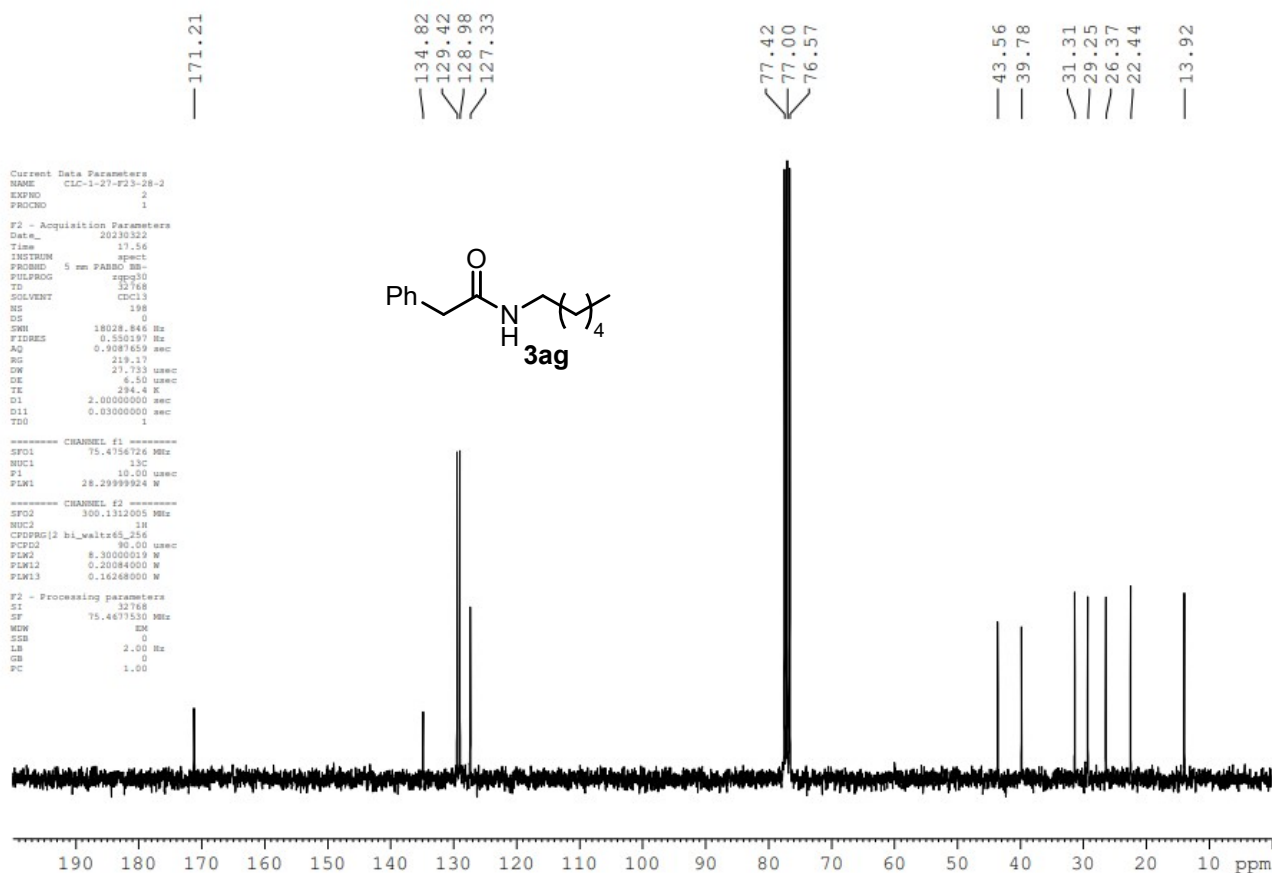

**Figure S65.**  $^{13}\text{C}$  NMR spectrum of compound **3ah** ( $\text{CDCl}_3$ , 75 MHz)

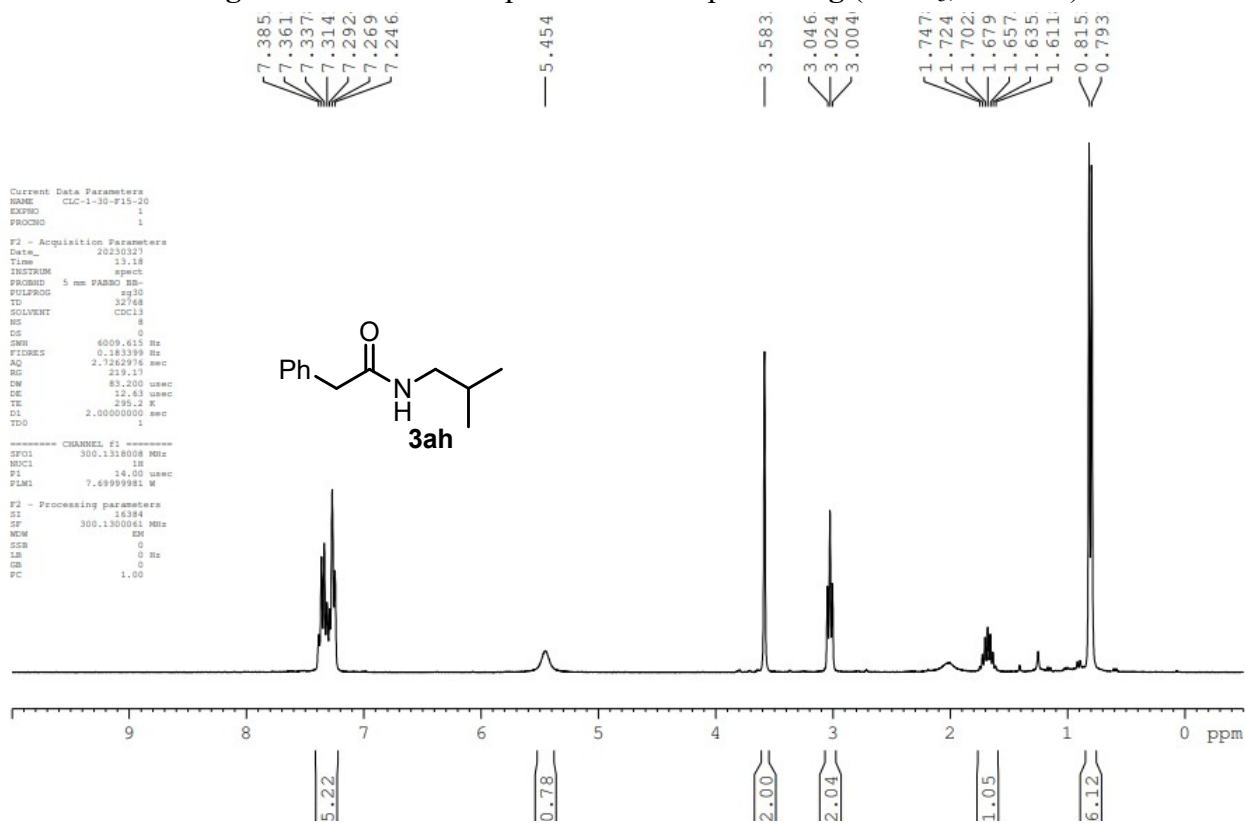

Figure S66. <sup>1</sup>H NMR spectrum of compound **3ah** (CDCl<sub>3</sub>, 300 MHz)

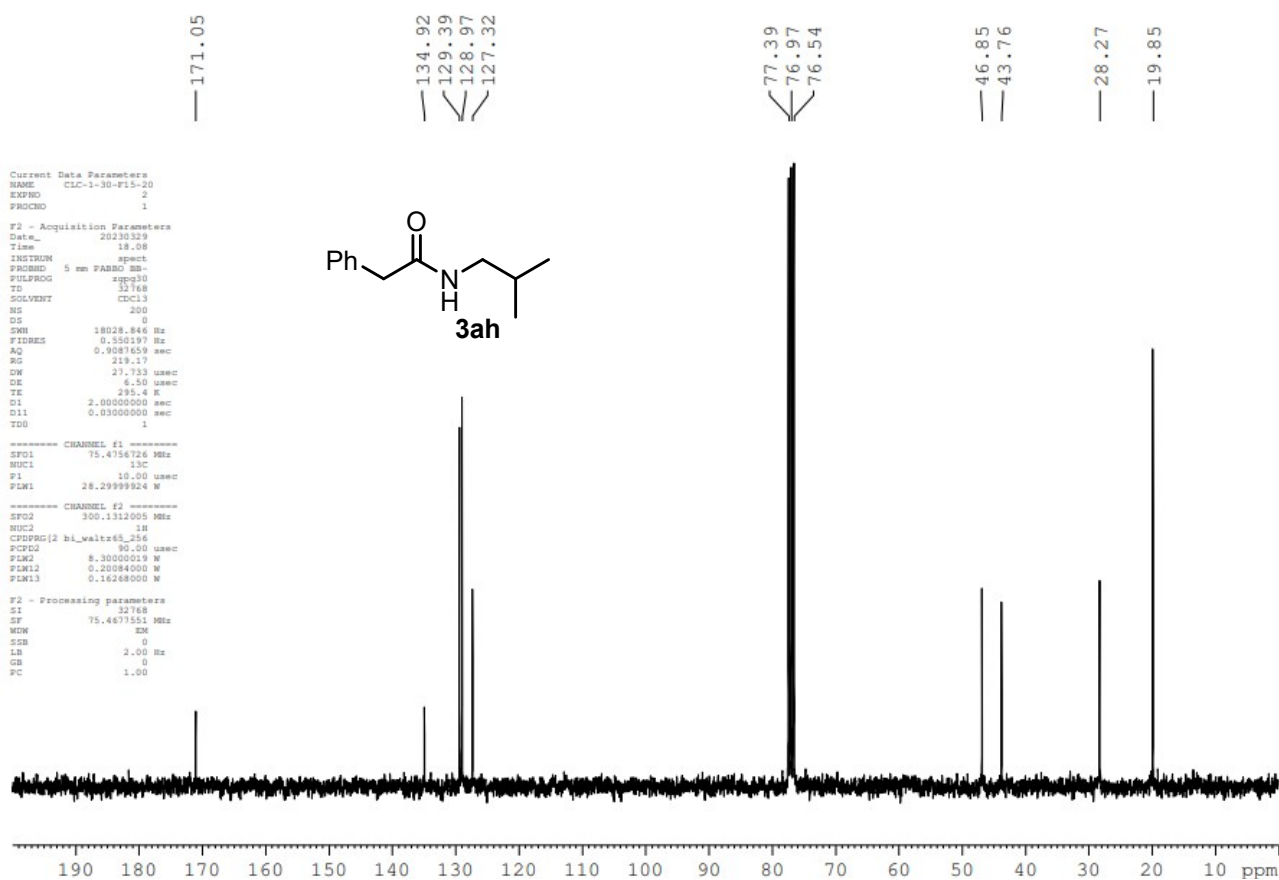

Figure S67. <sup>1</sup>H NMR spectrum of compound **3ai** (CDCl<sub>3</sub>, 75 MHz)

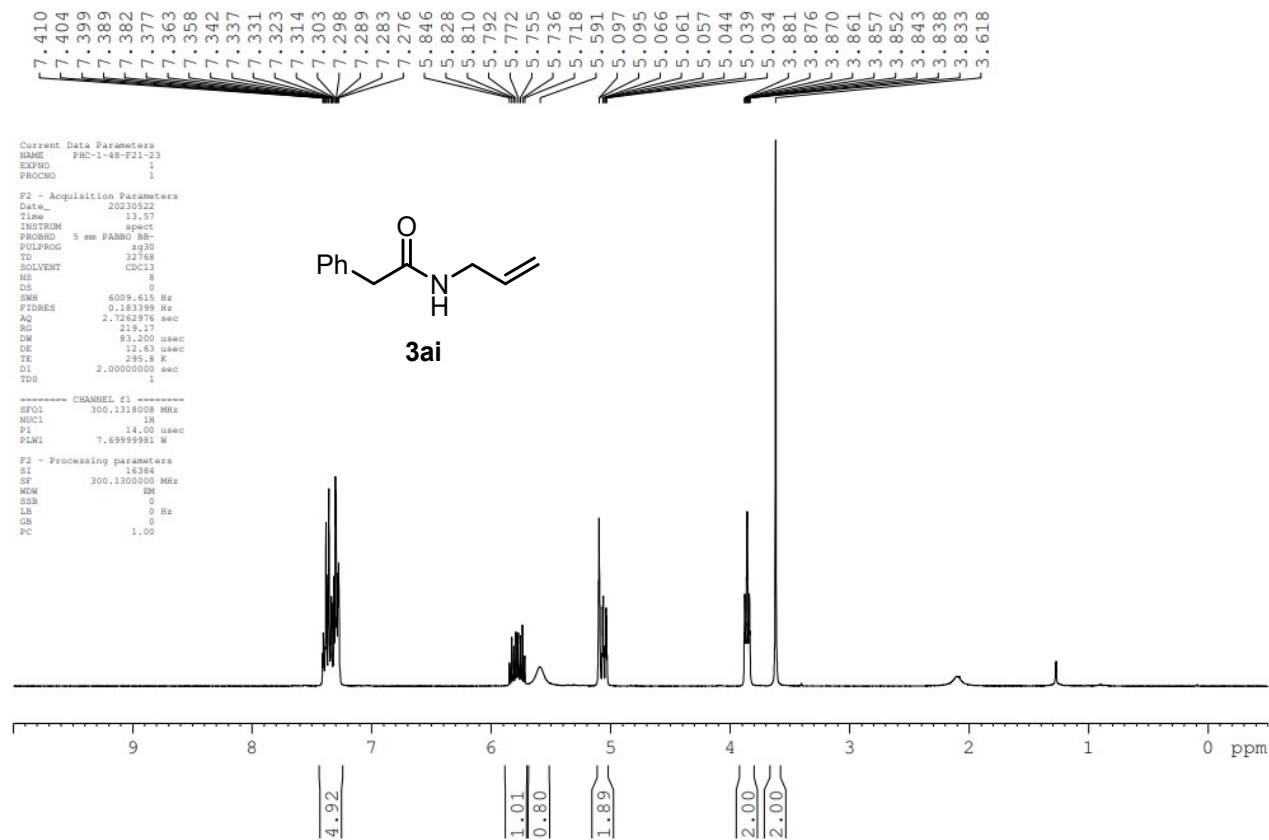

Figure S68. <sup>1</sup>H NMR spectrum of compound **3ai** (CDCl<sub>3</sub>, 300 MHz)

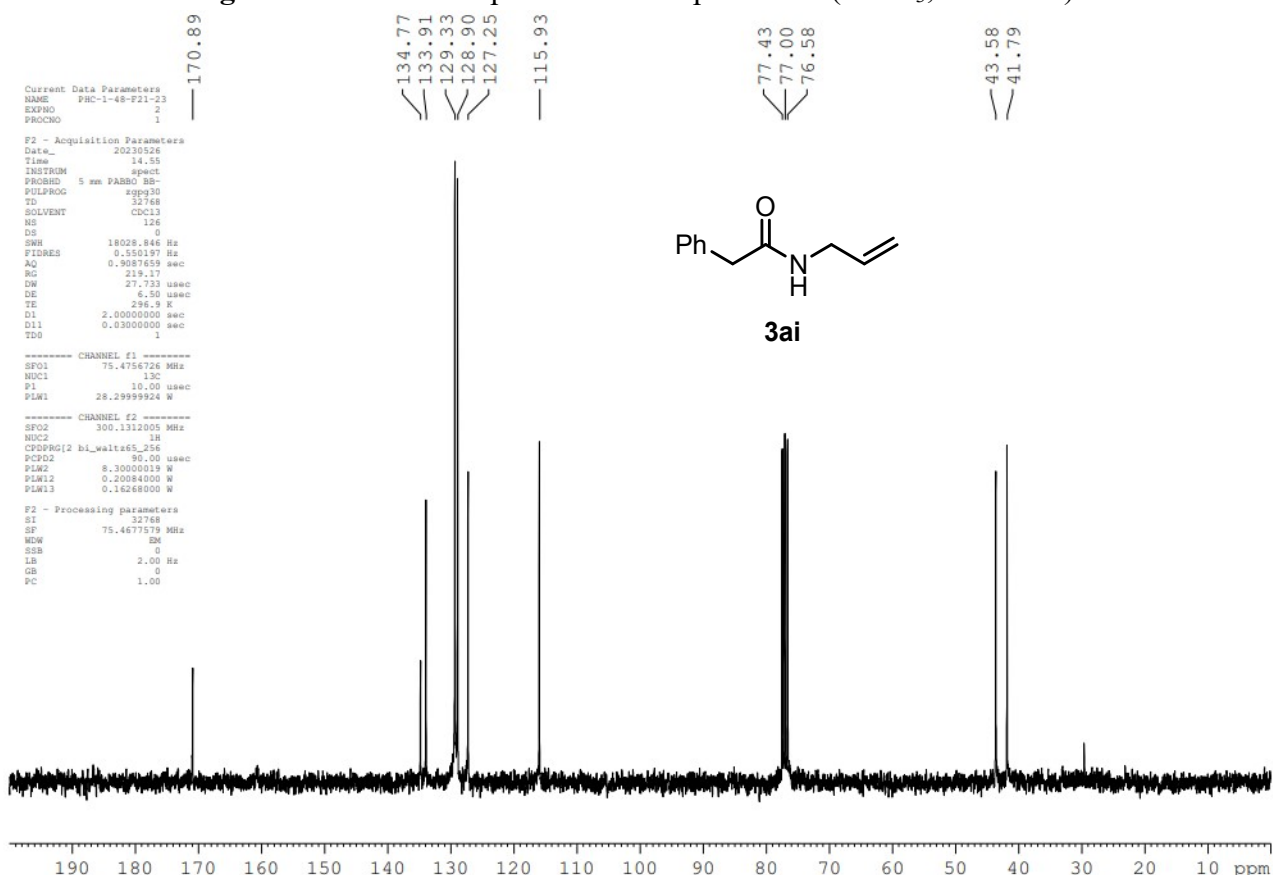

Figure S69. <sup>13</sup>C NMR spectrum of compound **3aj** (CDCl<sub>3</sub>, 300 MHz)

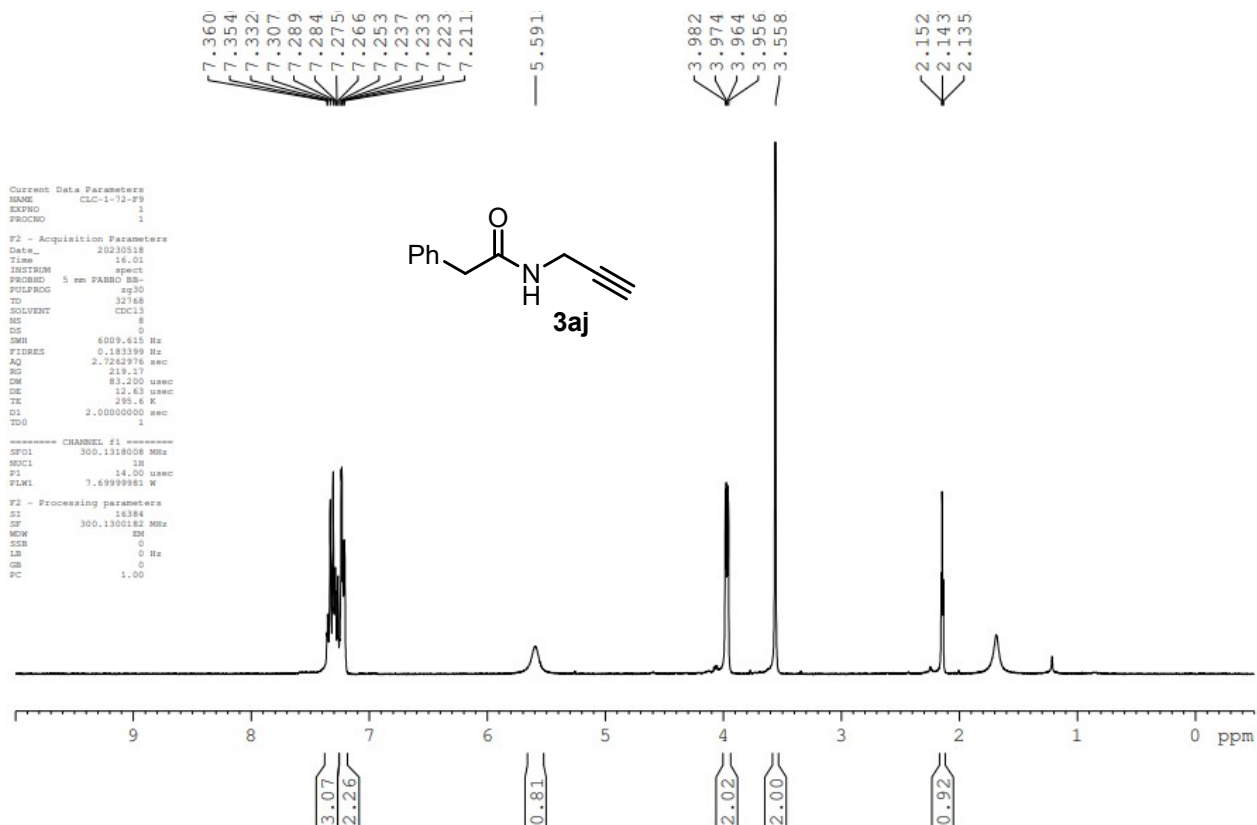

Figure S70. <sup>1</sup>H NMR spectrum of compound **3aj** (CDCl<sub>3</sub>, 300 MHz)

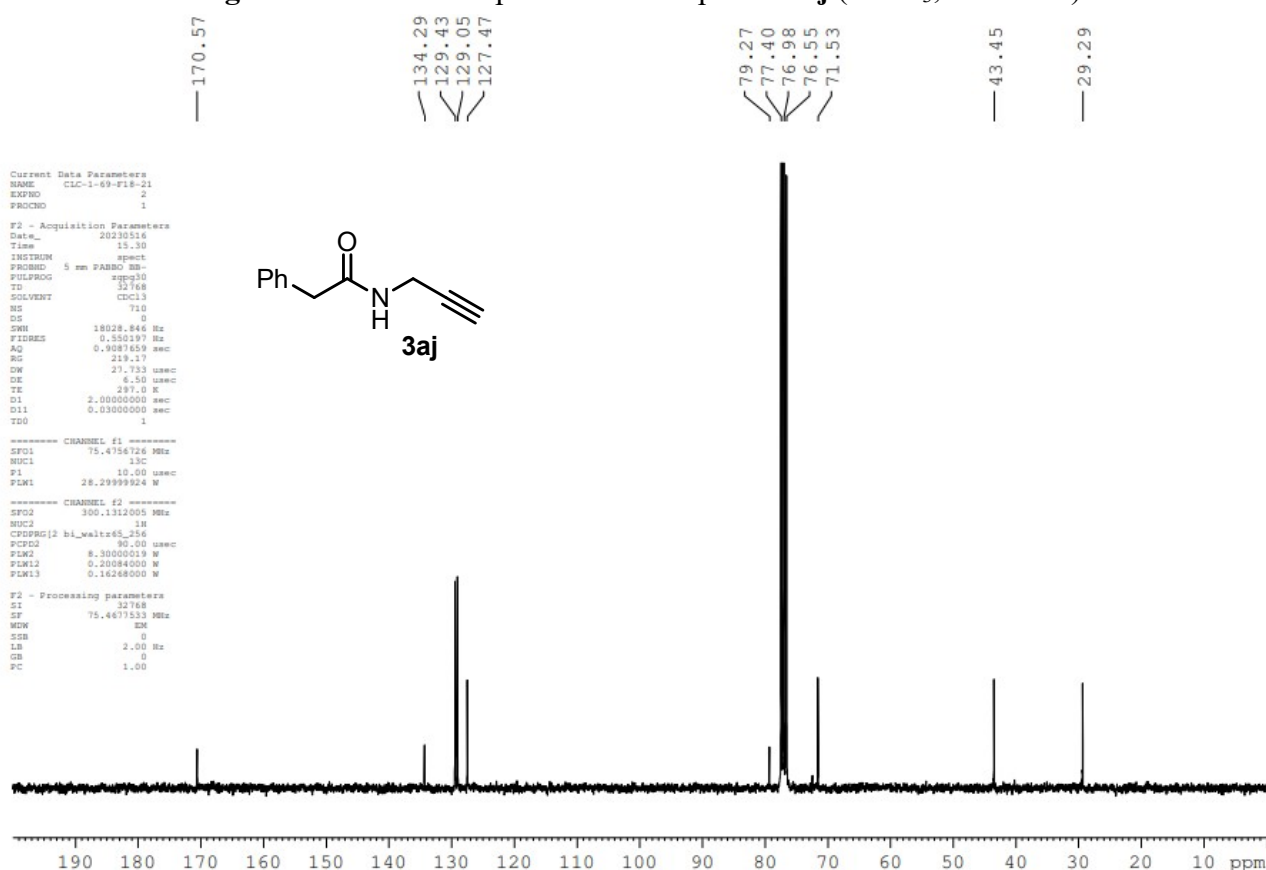

Figure S71. <sup>13</sup>C NMR spectrum of compound **3aj** (CDCl<sub>3</sub>, 75 MHz)

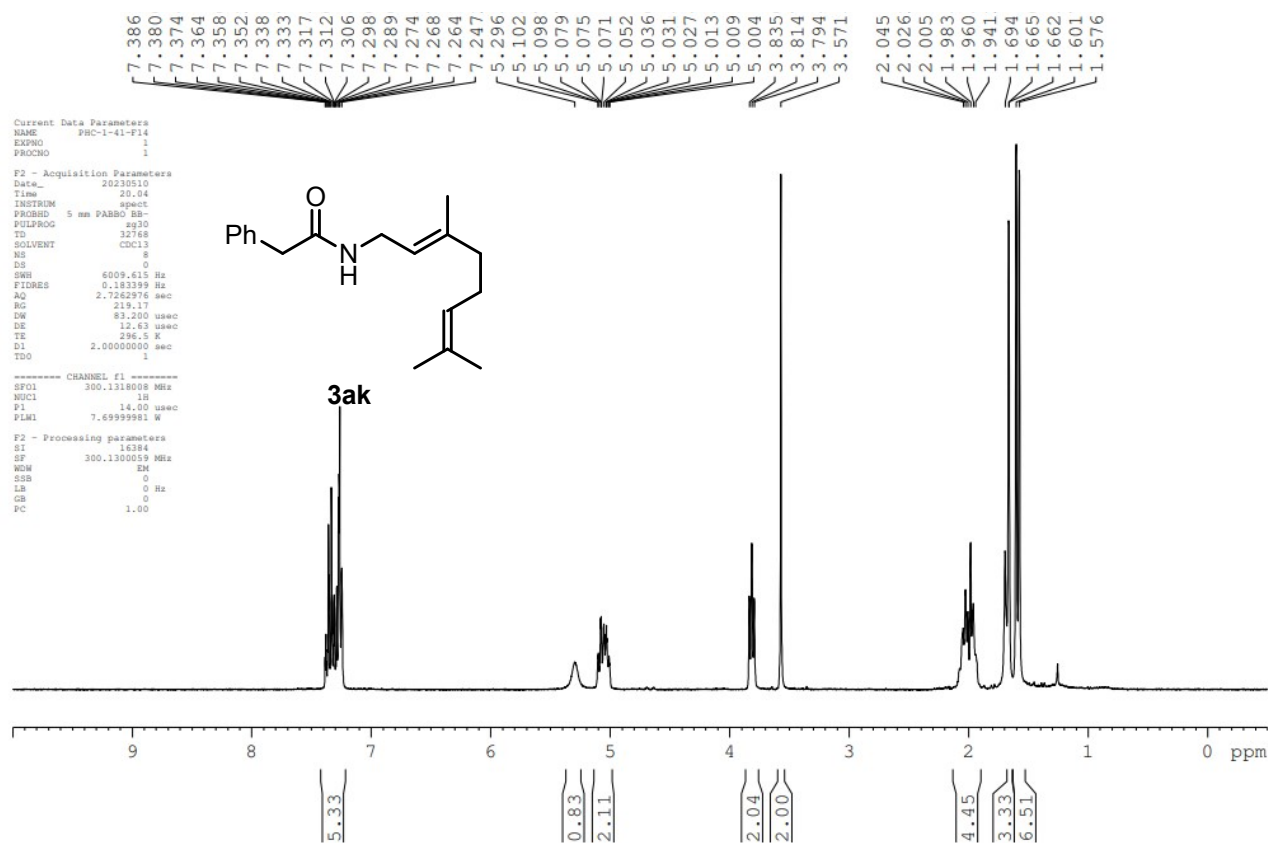

Figure S72. <sup>1</sup>H NMR spectrum of compound **3ak** (CDCl<sub>3</sub>, 300 MHz)

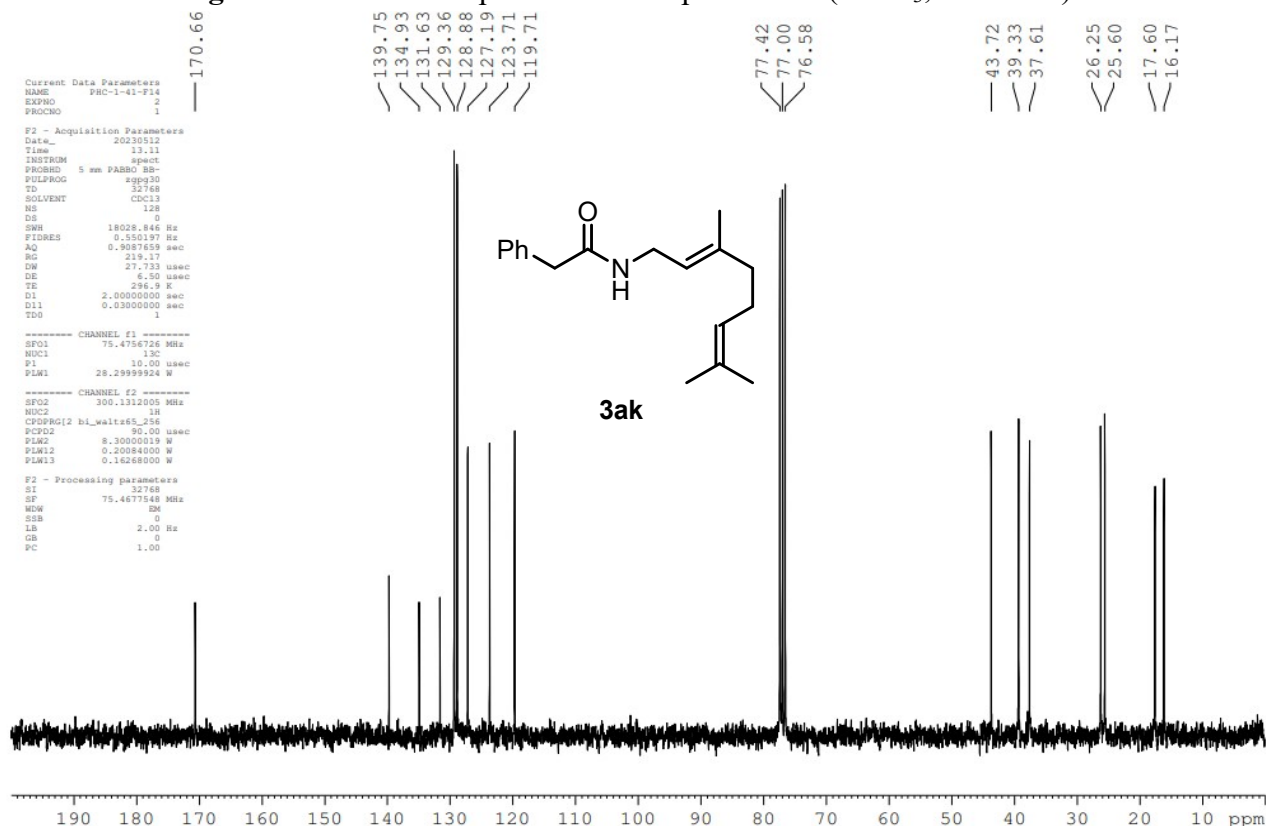

Figure S73. <sup>13</sup>C NMR spectrum of compound **3ak** (CDCl<sub>3</sub>, 75 MHz)

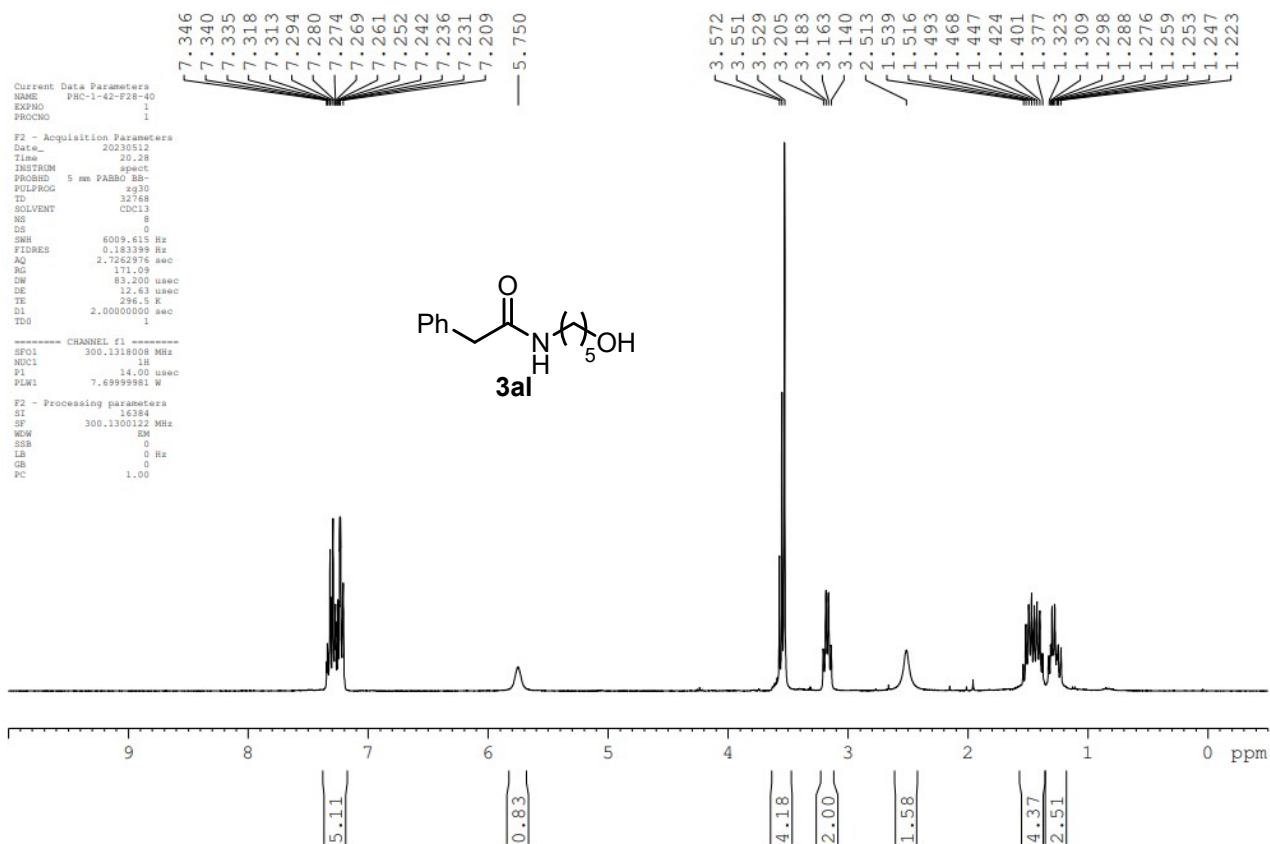

Figure S74. <sup>1</sup>H NMR spectrum of compound **3al** (CDCl<sub>3</sub>, 300 MHz)

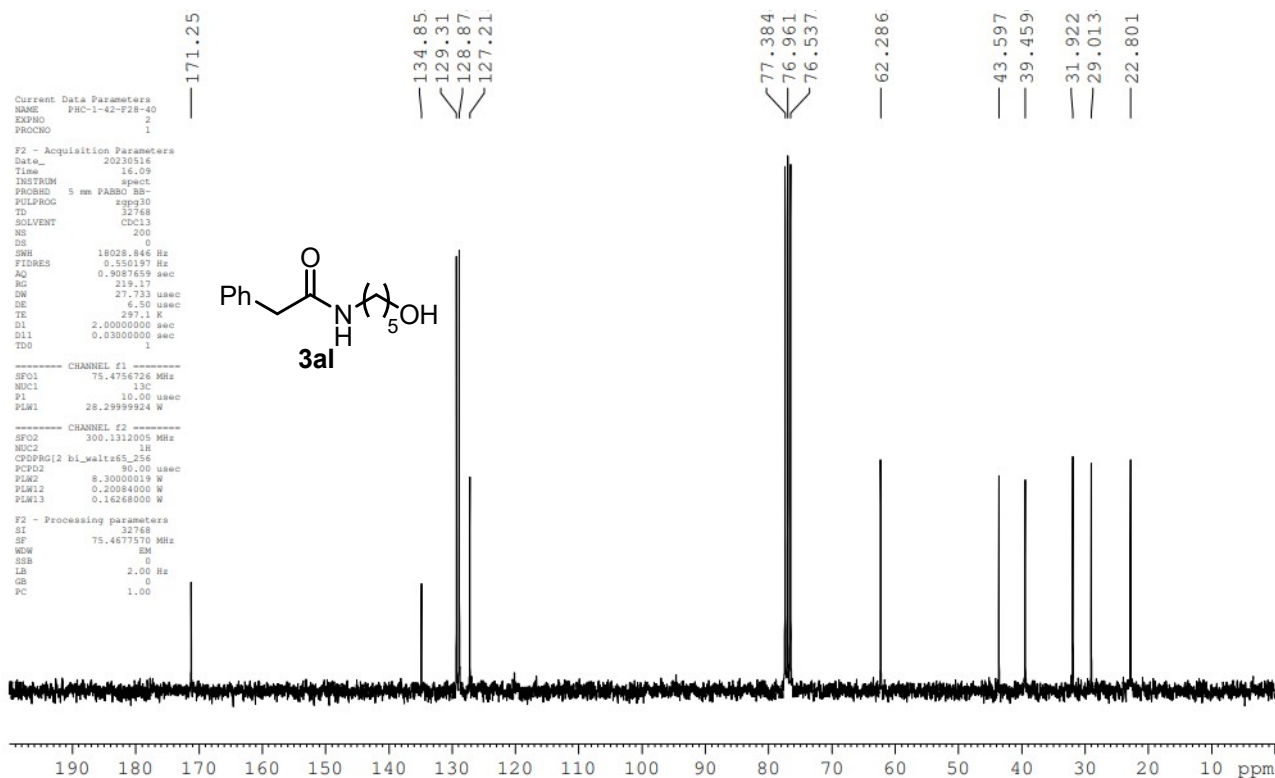

Figure S75. <sup>13</sup>C NMR spectrum of compound **3al** (CDCl<sub>3</sub>, 75 MHz)

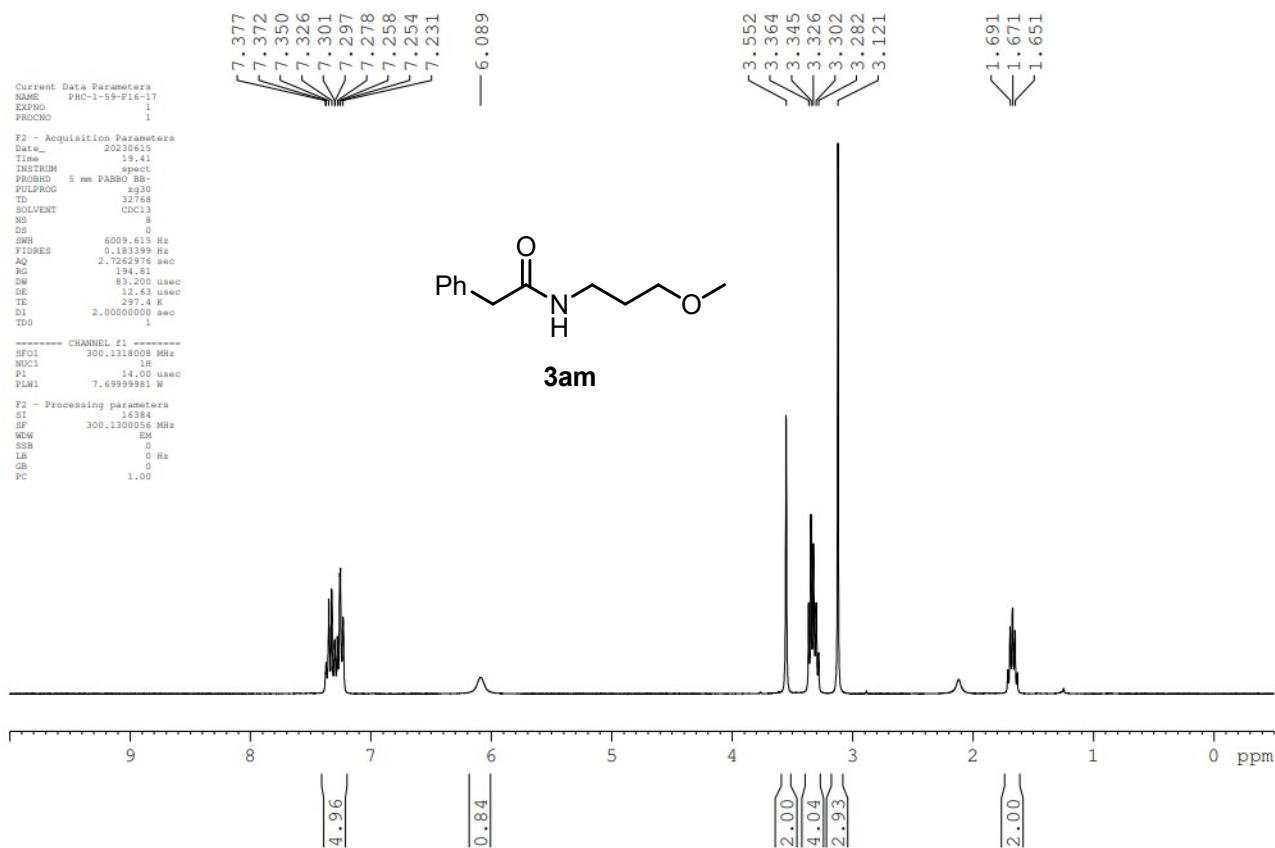

Figure S76. <sup>1</sup>H NMR spectrum of compound **3am** (CDCl<sub>3</sub>, 300 MHz)

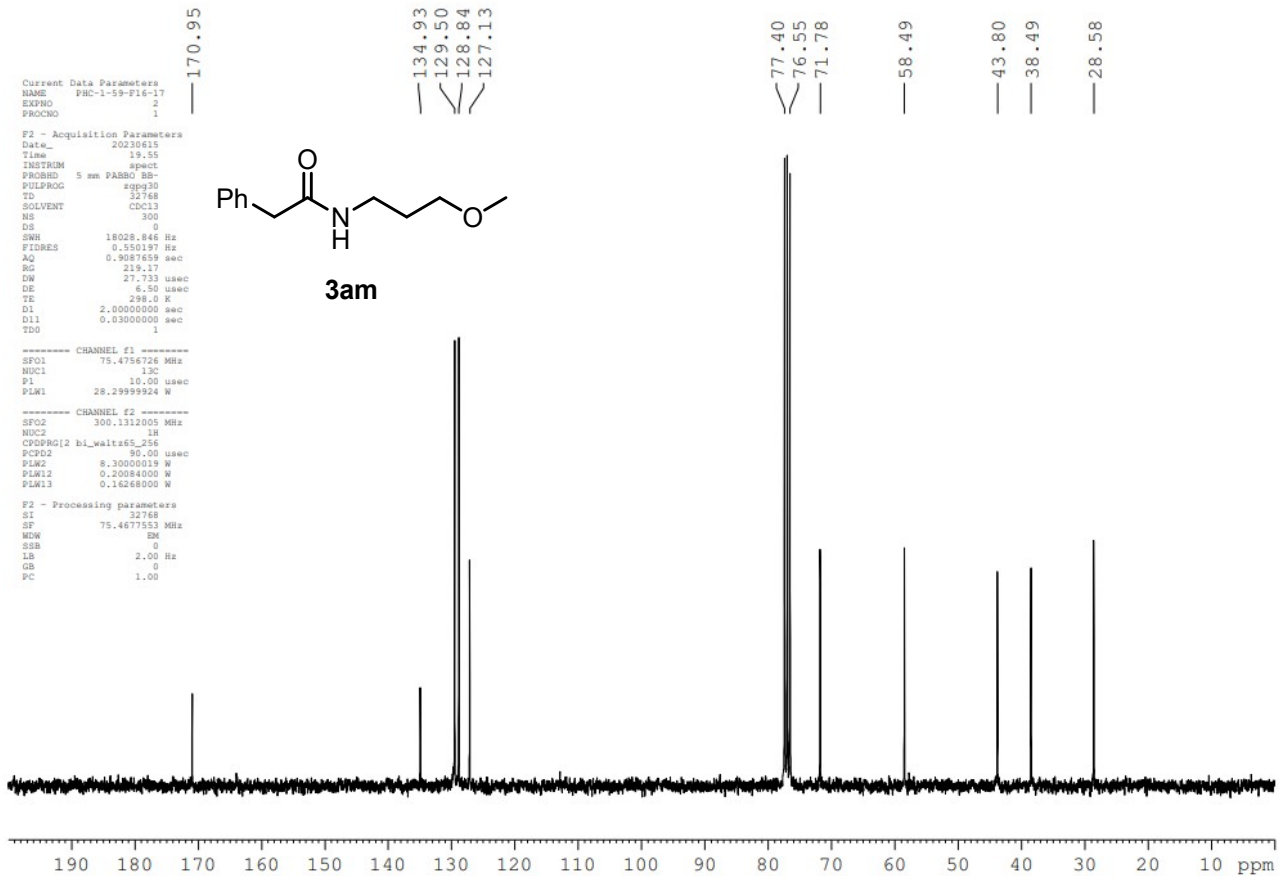

Figure S77. <sup>13</sup>C NMR spectrum of compound **3am** (CDCl<sub>3</sub>, 75 MHz)

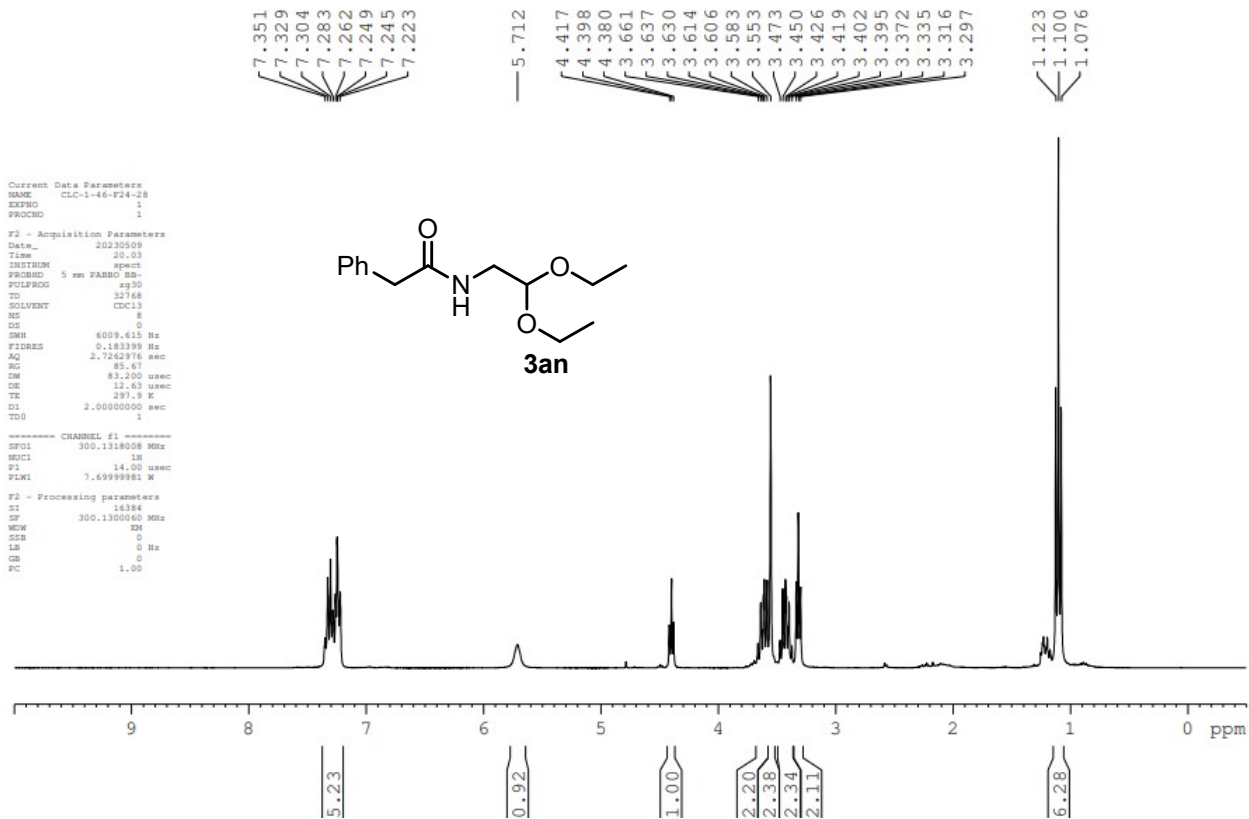

Figure S78. <sup>1</sup>H NMR spectrum of compound **3an** (CDCl<sub>3</sub>, 300 MHz)



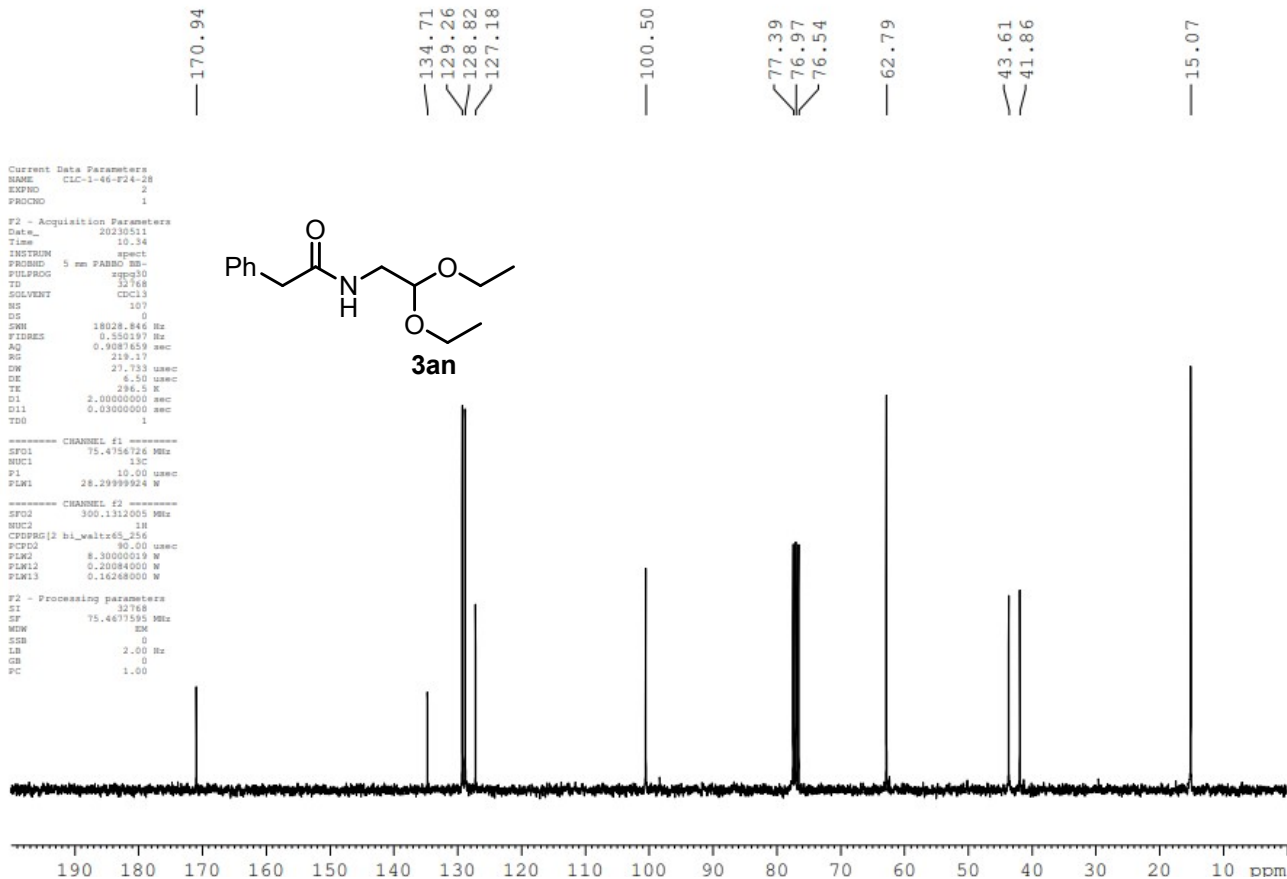

**Figure S79.**  $^{13}\text{C}$  NMR spectrum of compound **3an** ( $\text{CDCl}_3$ , 75 MHz)

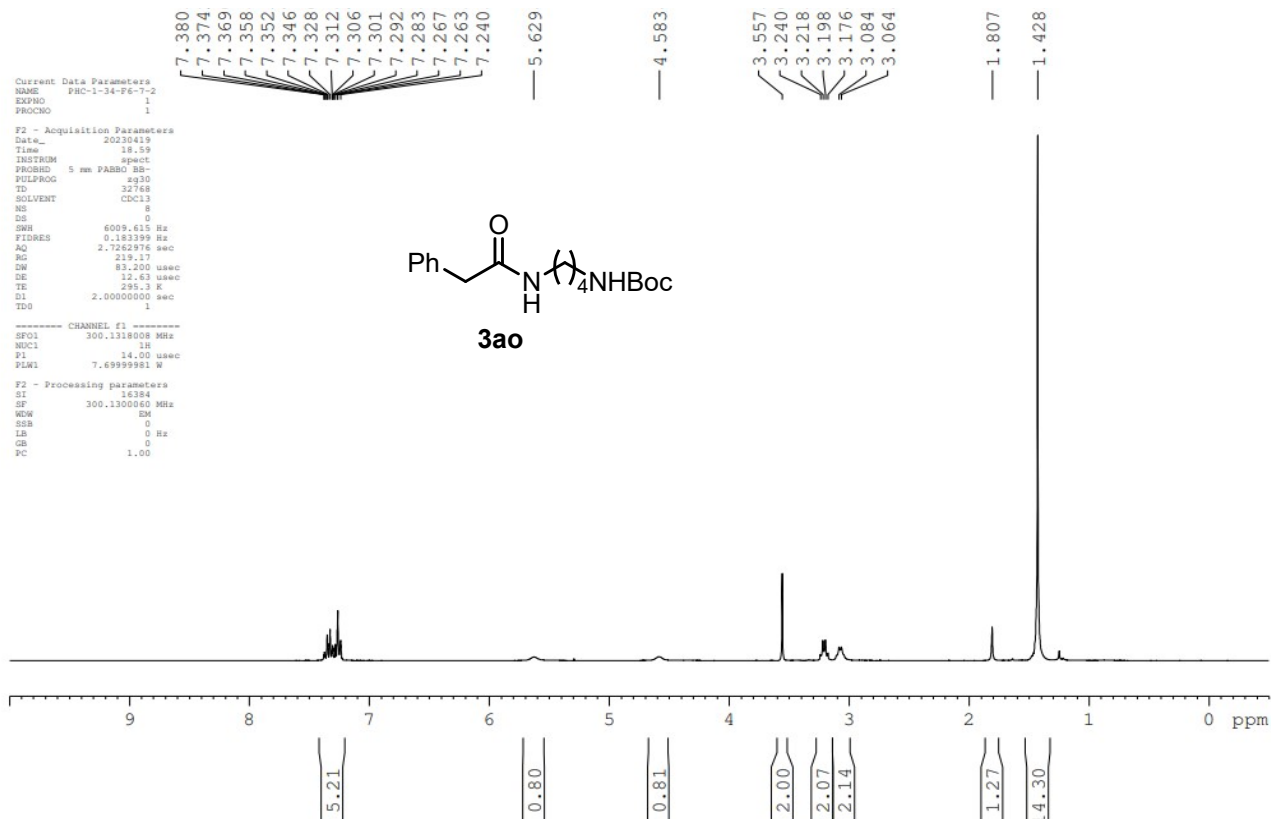

**Figure S80.**  $^1\text{H}$  NMR spectrum of compound **3ao** ( $\text{CDCl}_3$ , 300 MHz)

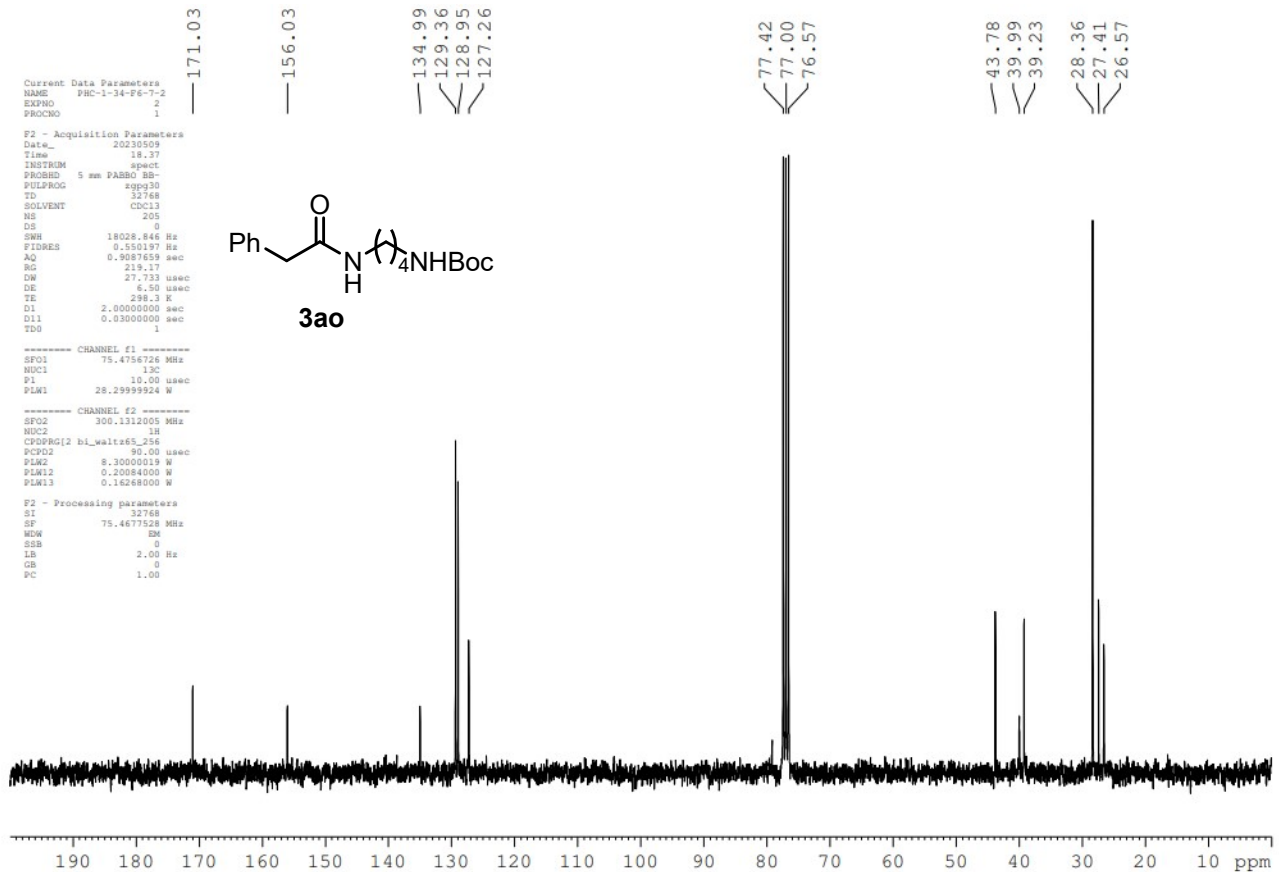

Figure S81. <sup>13</sup>C NMR spectrum of compound **3ao** (CDCl<sub>3</sub>, 75 MHz)

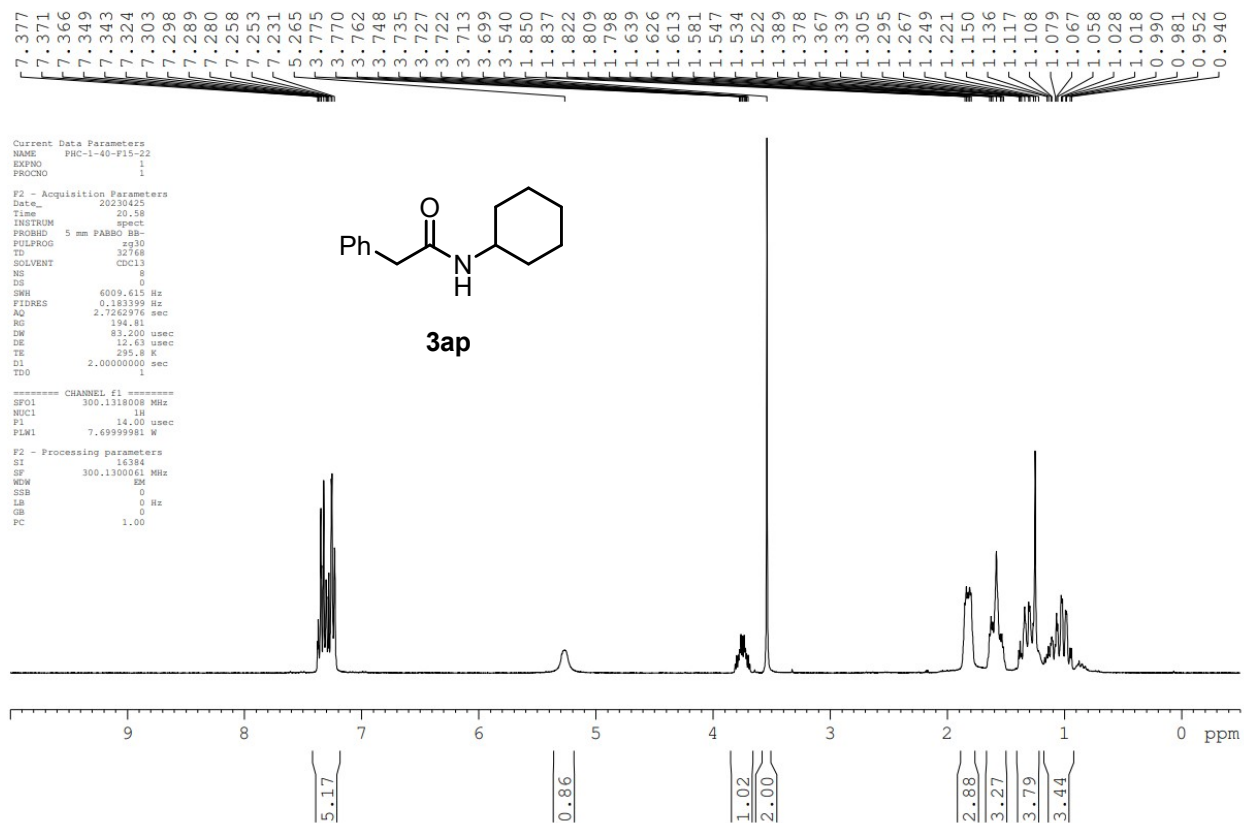

Figure S82. <sup>1</sup>H NMR spectrum of compound **3ap** (CDCl<sub>3</sub>, 300 MHz)

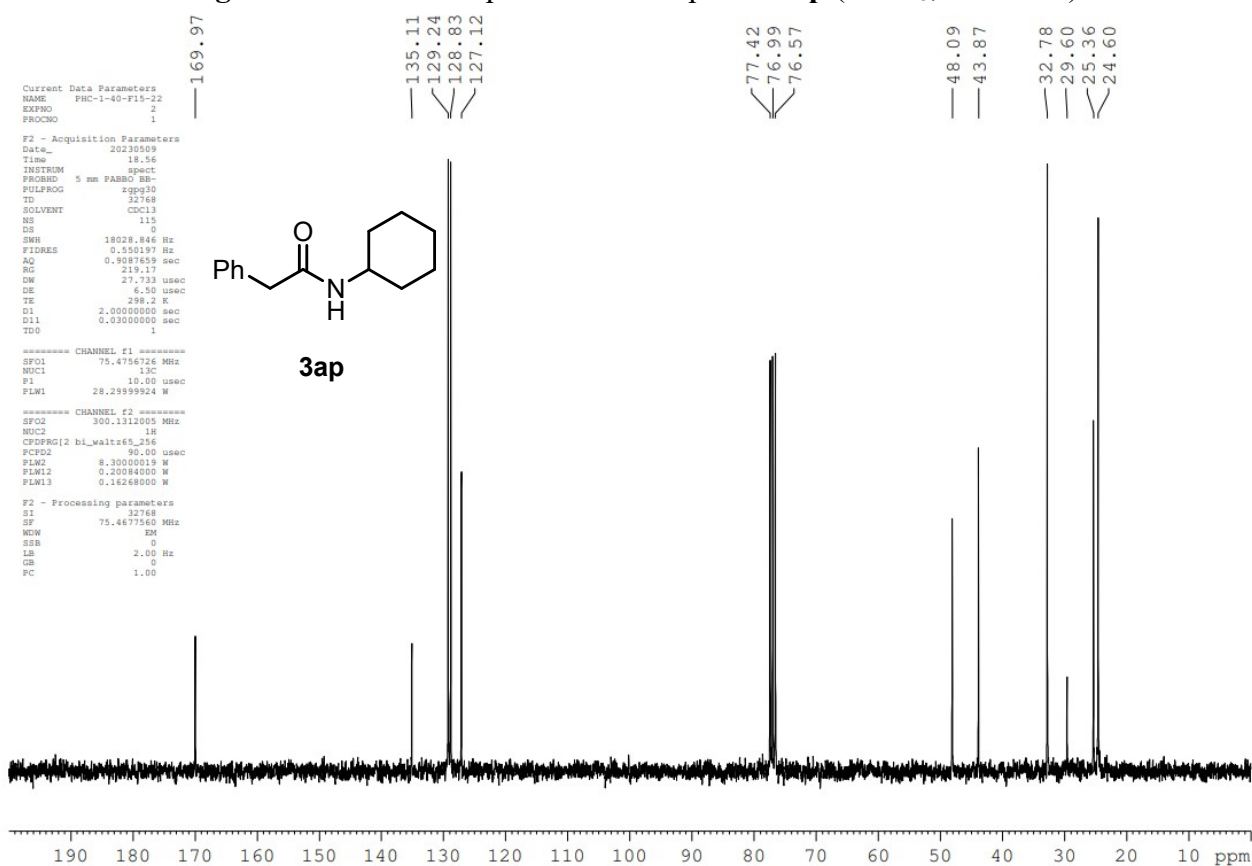

Figure S83. <sup>13</sup>C NMR spectrum of compound **3aq** (CDCl<sub>3</sub>, 75 MHz)

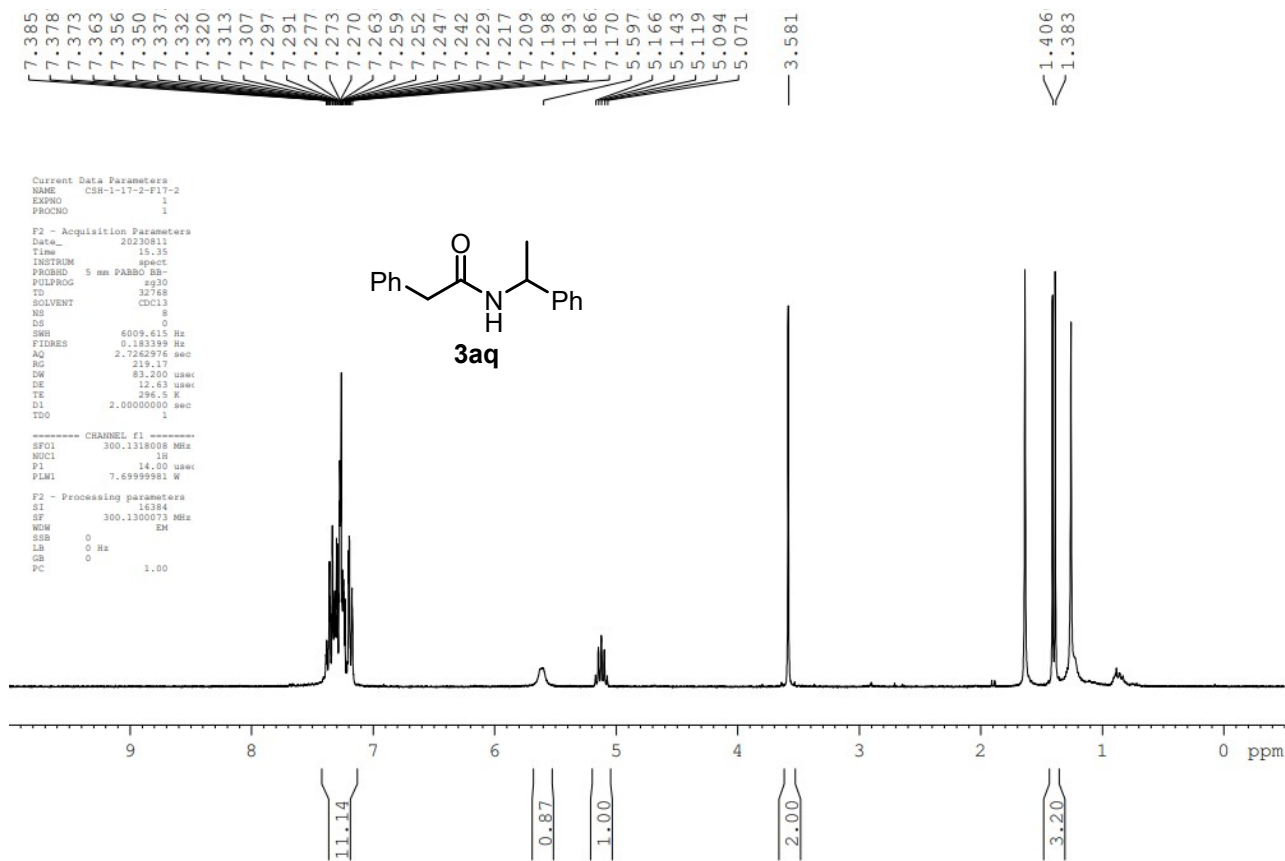

**Figure S84.** <sup>1</sup>H NMR spectrum of compound **3aq** (CDCl<sub>3</sub>, 300 MHz)

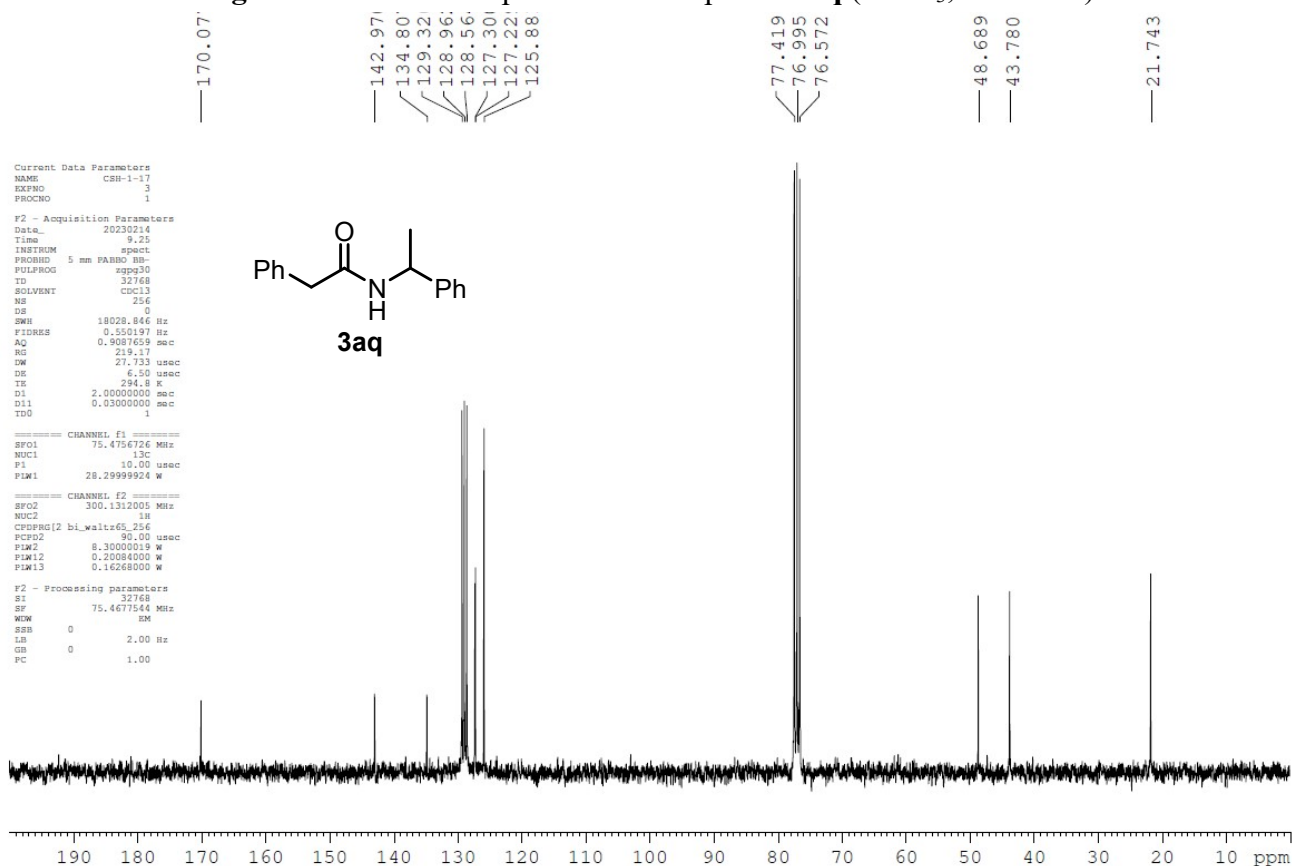

**Figure S85.** <sup>13</sup>C NMR spectrum of compound **3ar** (CDCl<sub>3</sub>, 75 MHz)

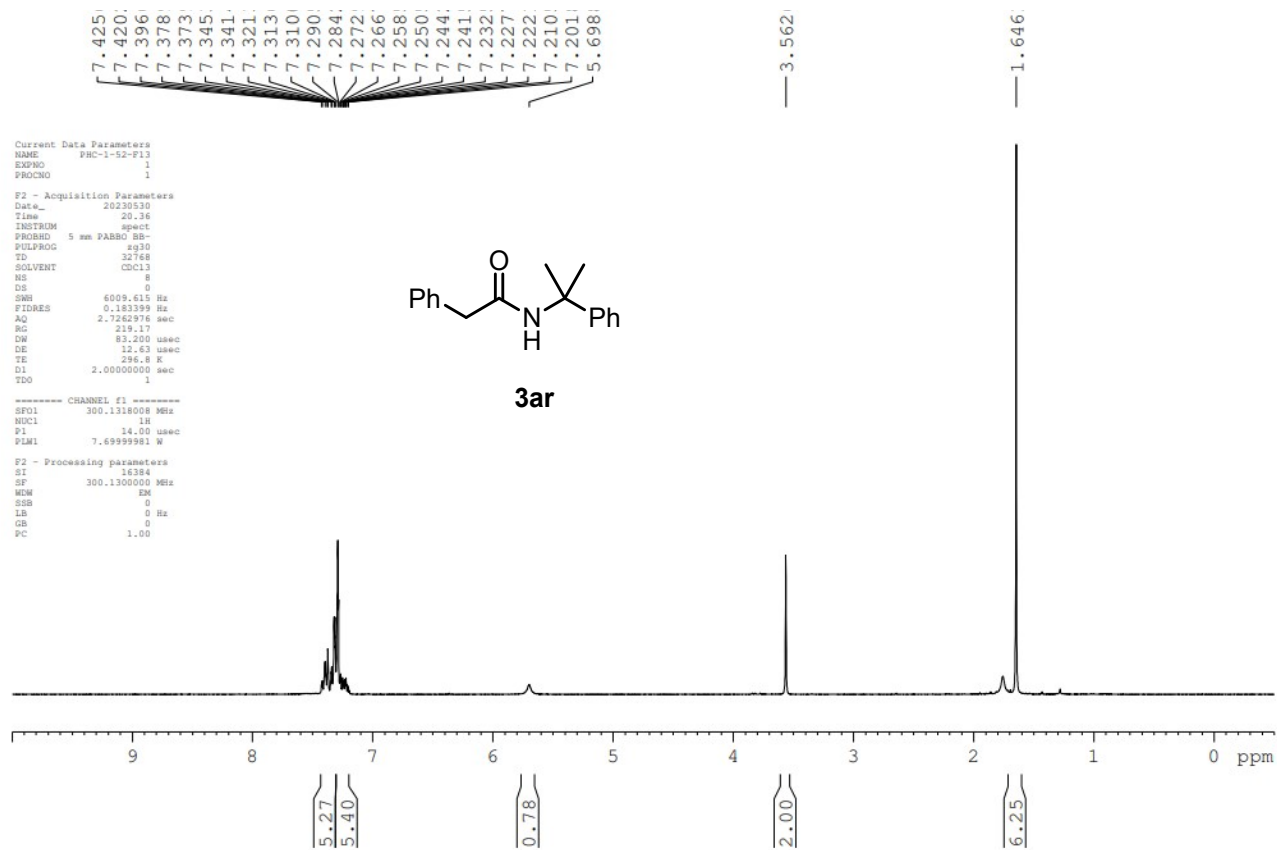

Figure S86. <sup>1</sup>H NMR spectrum of compound **3ar** (CDCl<sub>3</sub>, 300 MHz)

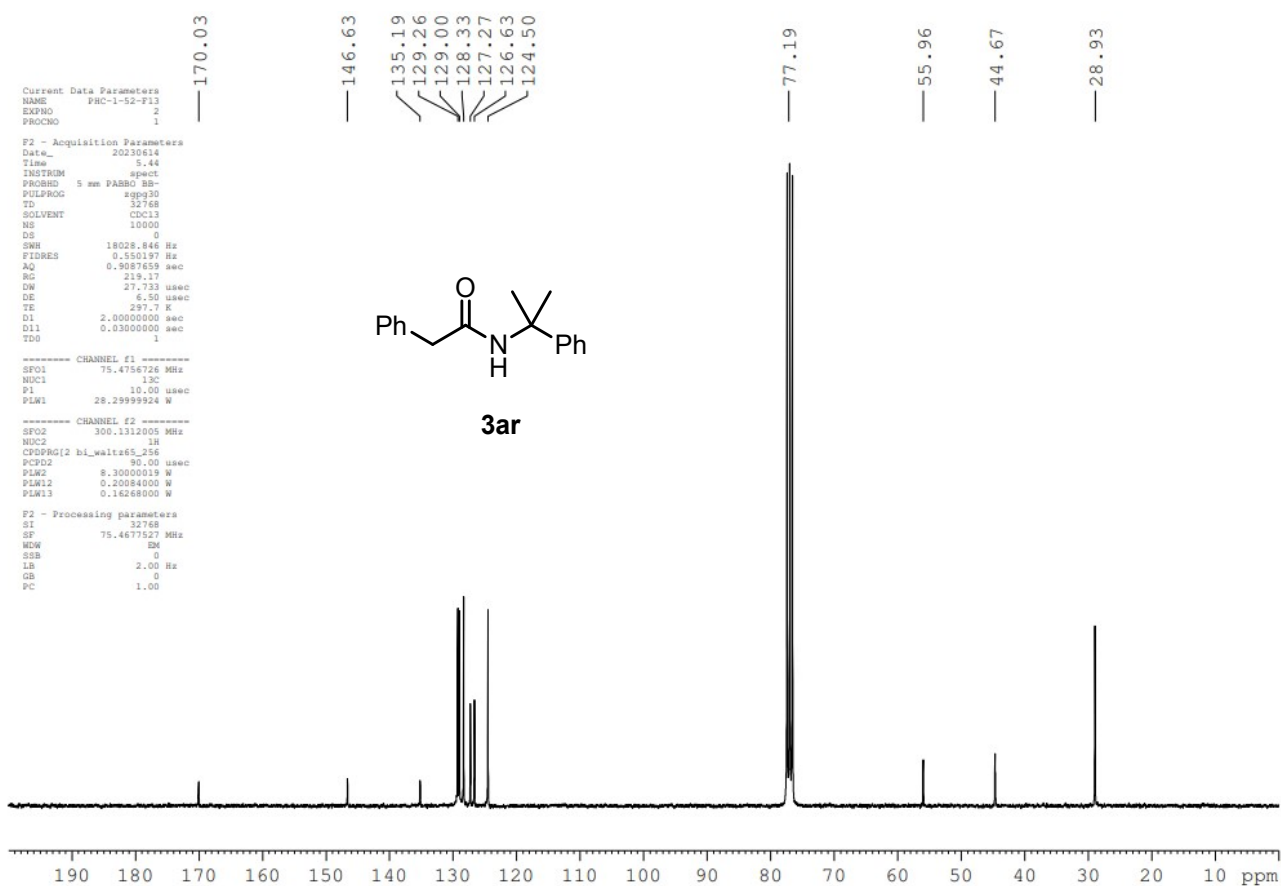

Figure S87. <sup>13</sup>C NMR spectrum of compound **3ar** (CDCl<sub>3</sub>, 75 MHz)

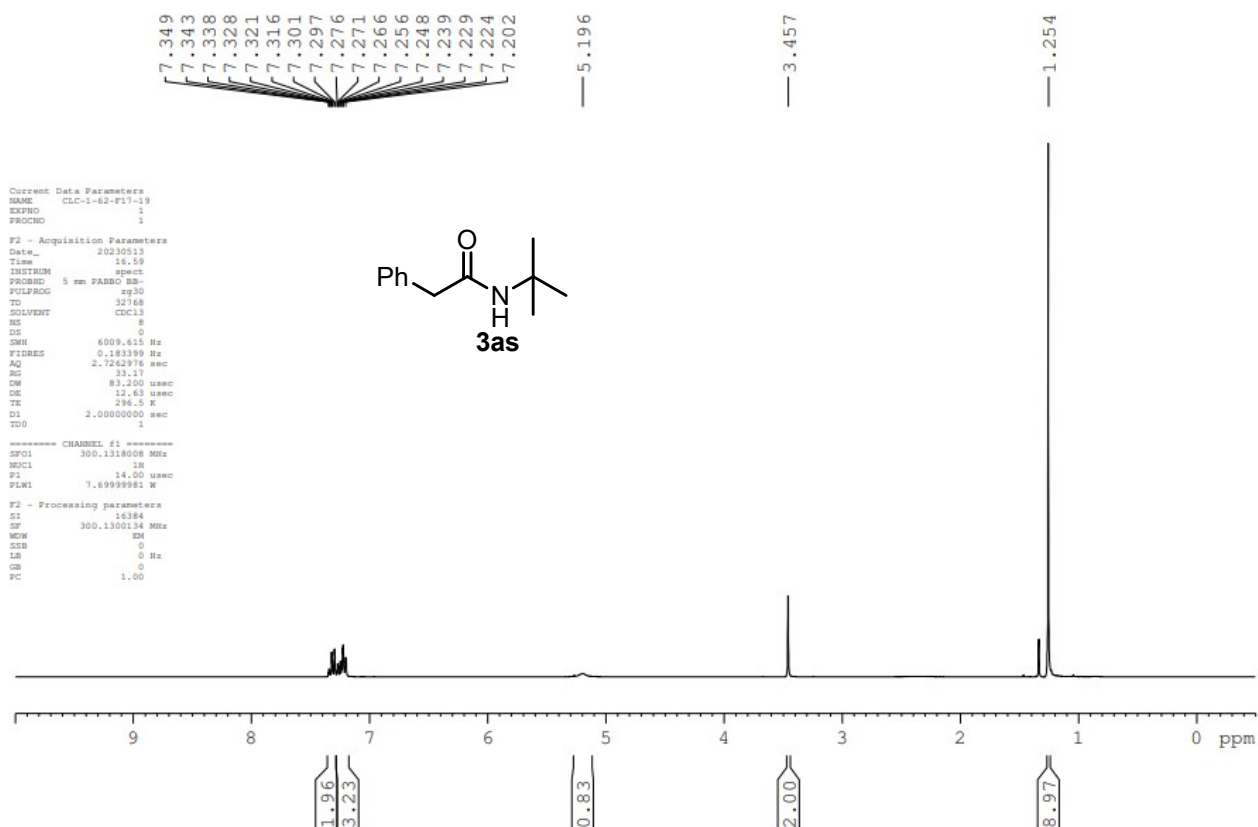

Figure S88. <sup>1</sup>H NMR spectrum of compound **3as** (CDCl<sub>3</sub>, 300 MHz)

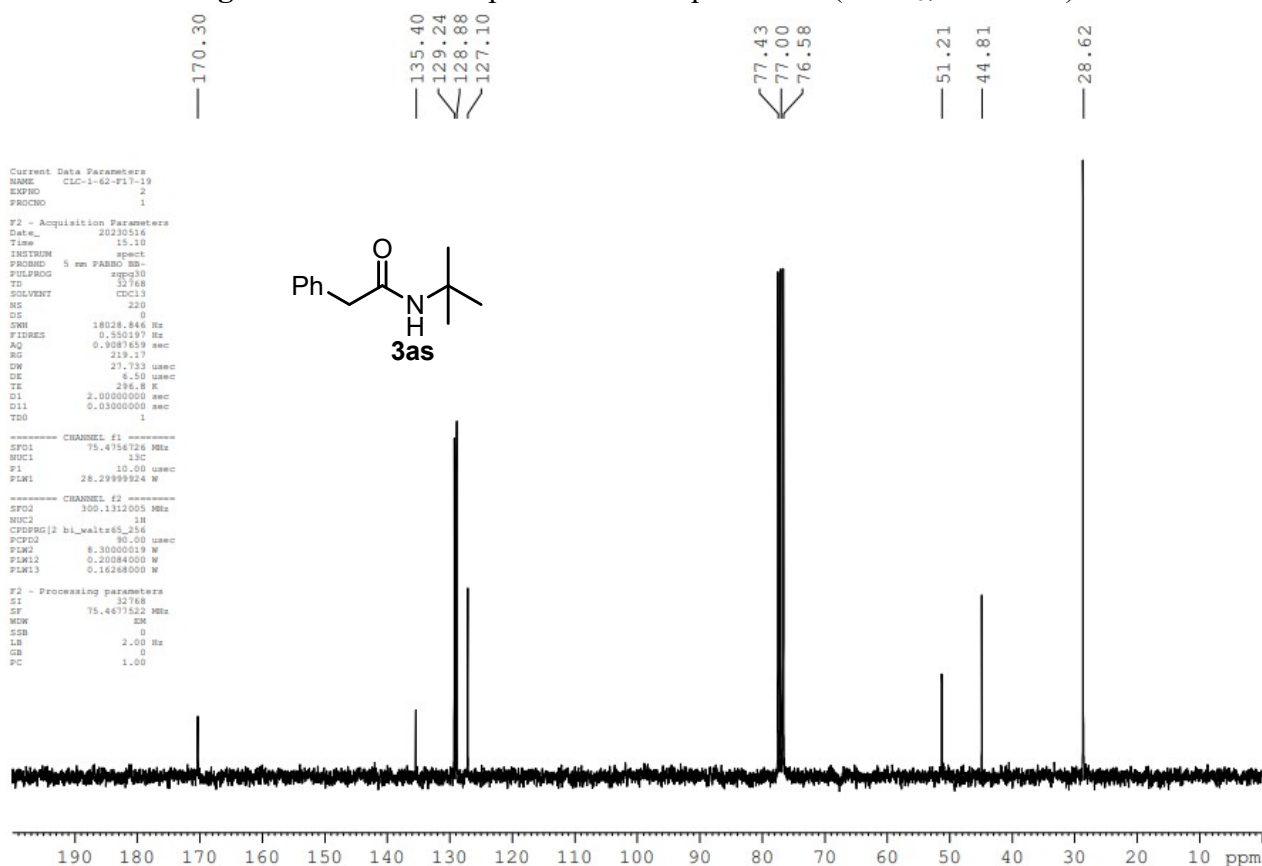

Figure S89. <sup>13</sup>C NMR spectrum of compound **3at** (CDCl<sub>3</sub>, 75 MHz)

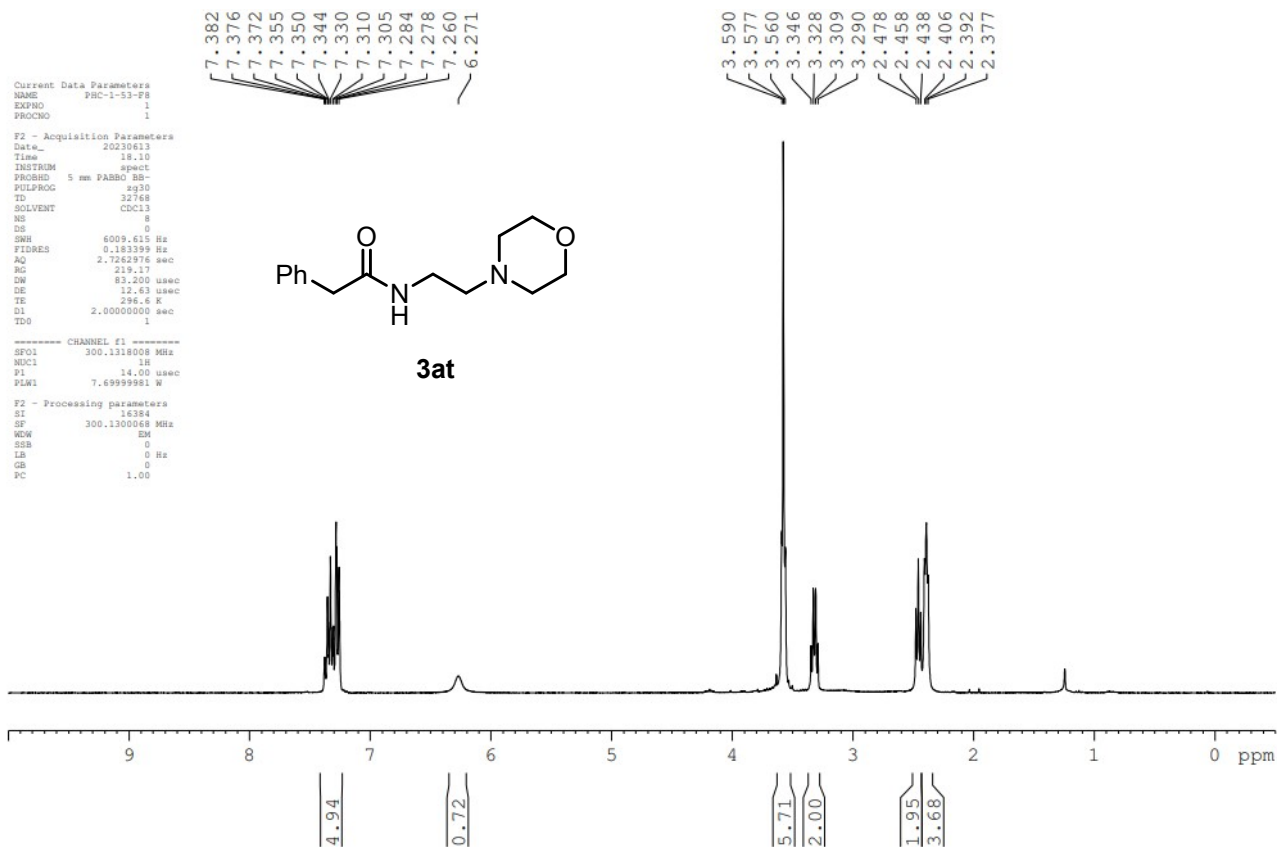

Figure S90. <sup>1</sup>H NMR spectrum of compound **3at** (CDCl<sub>3</sub>, 300 MHz)

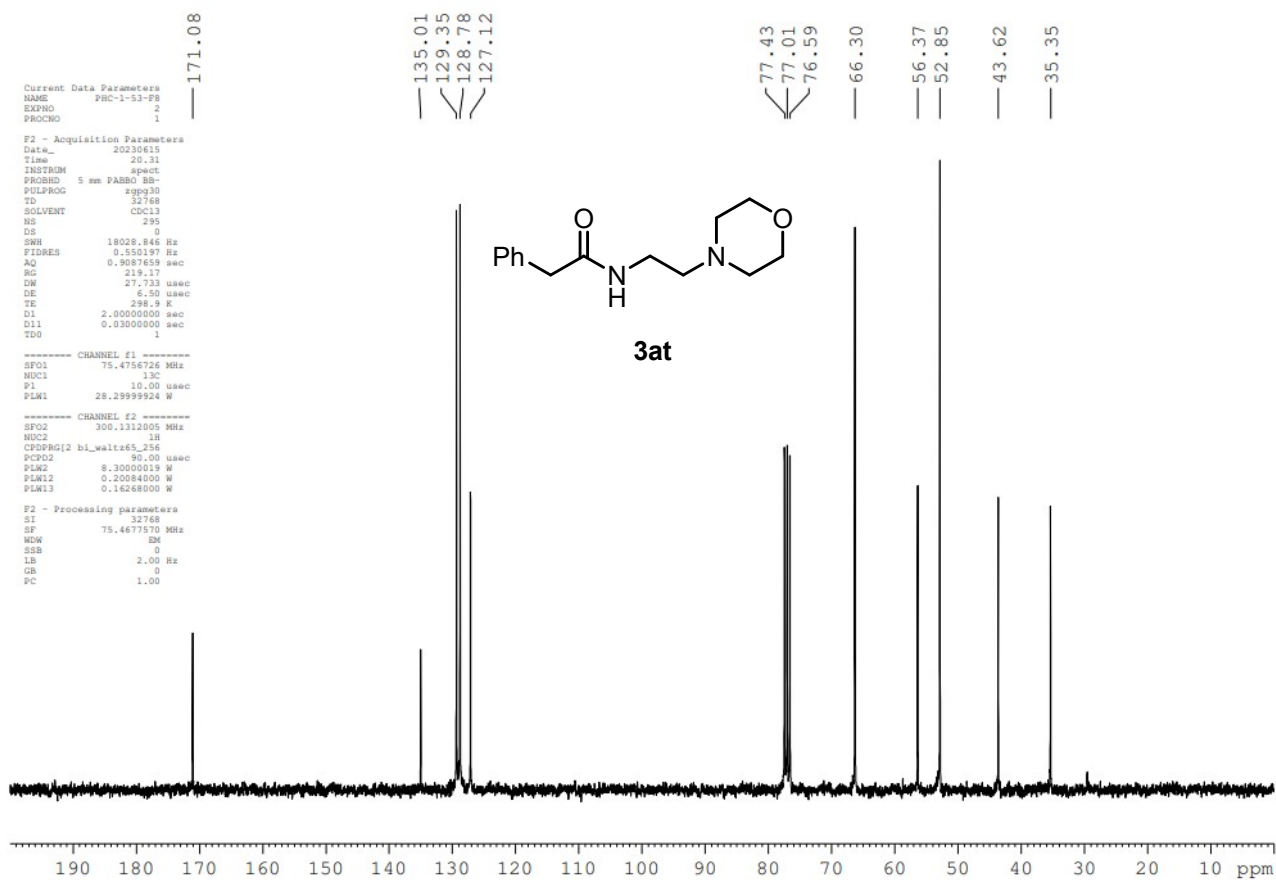

Figure S91. <sup>13</sup>C NMR spectrum of compound **3au** (CDCl<sub>3</sub>, 75 MHz)

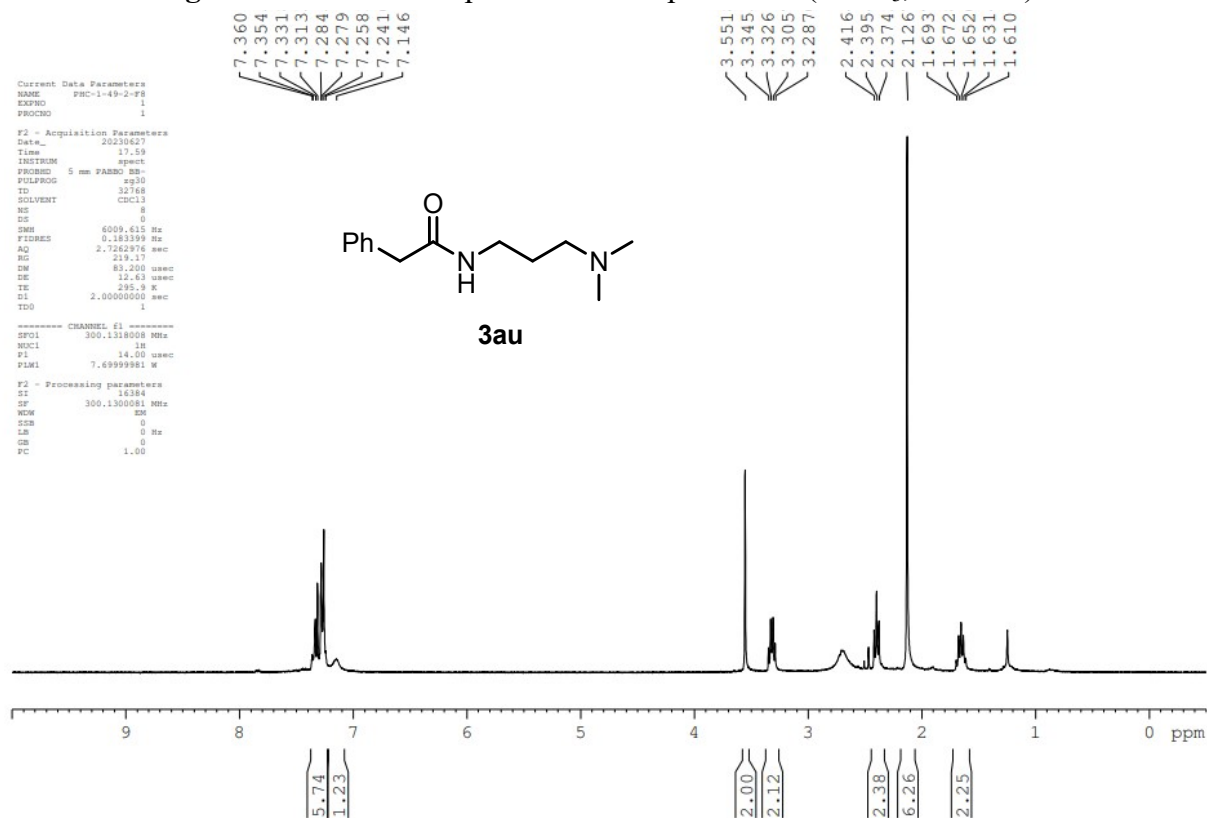

**Figure S92.**  $^1\text{H}$  NMR spectrum of compound **3au** ( $\text{CDCl}_3$ , 300 MHz)

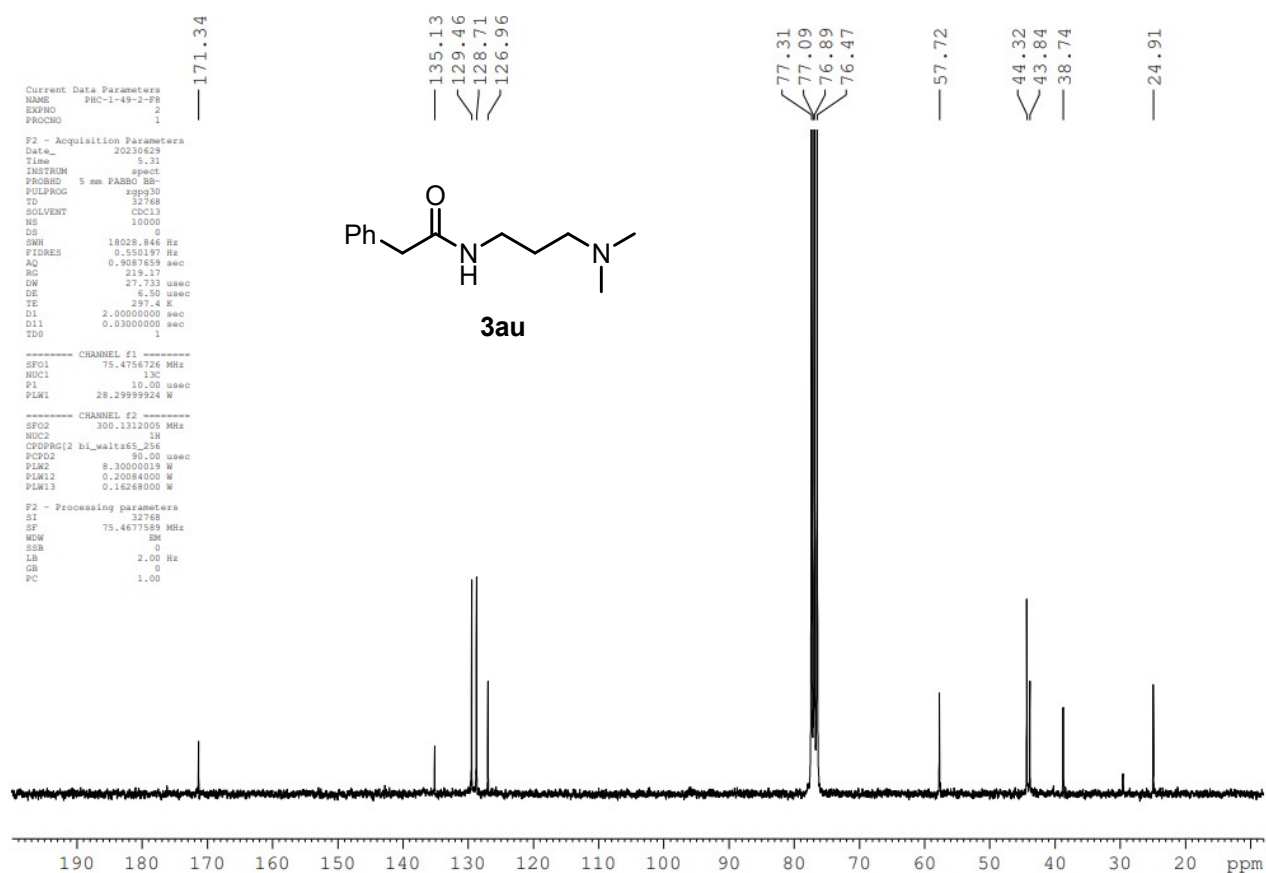

**Figure S93.**  $^{13}\text{C}$  NMR spectrum of compound **3au** ( $\text{CDCl}_3$ , 75 MHz)



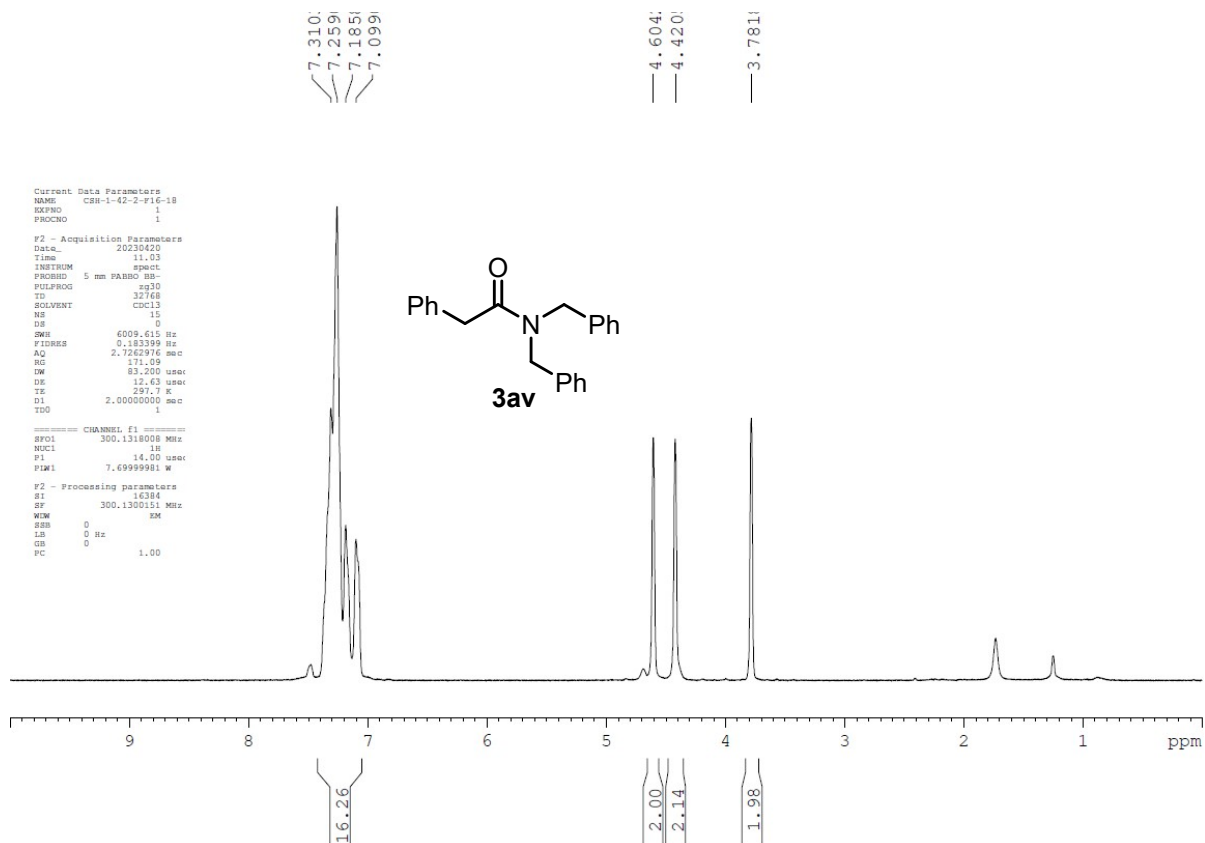

Figure S94. <sup>1</sup>H NMR spectrum of compound **3av** (CDCl<sub>3</sub>, 300 MHz)

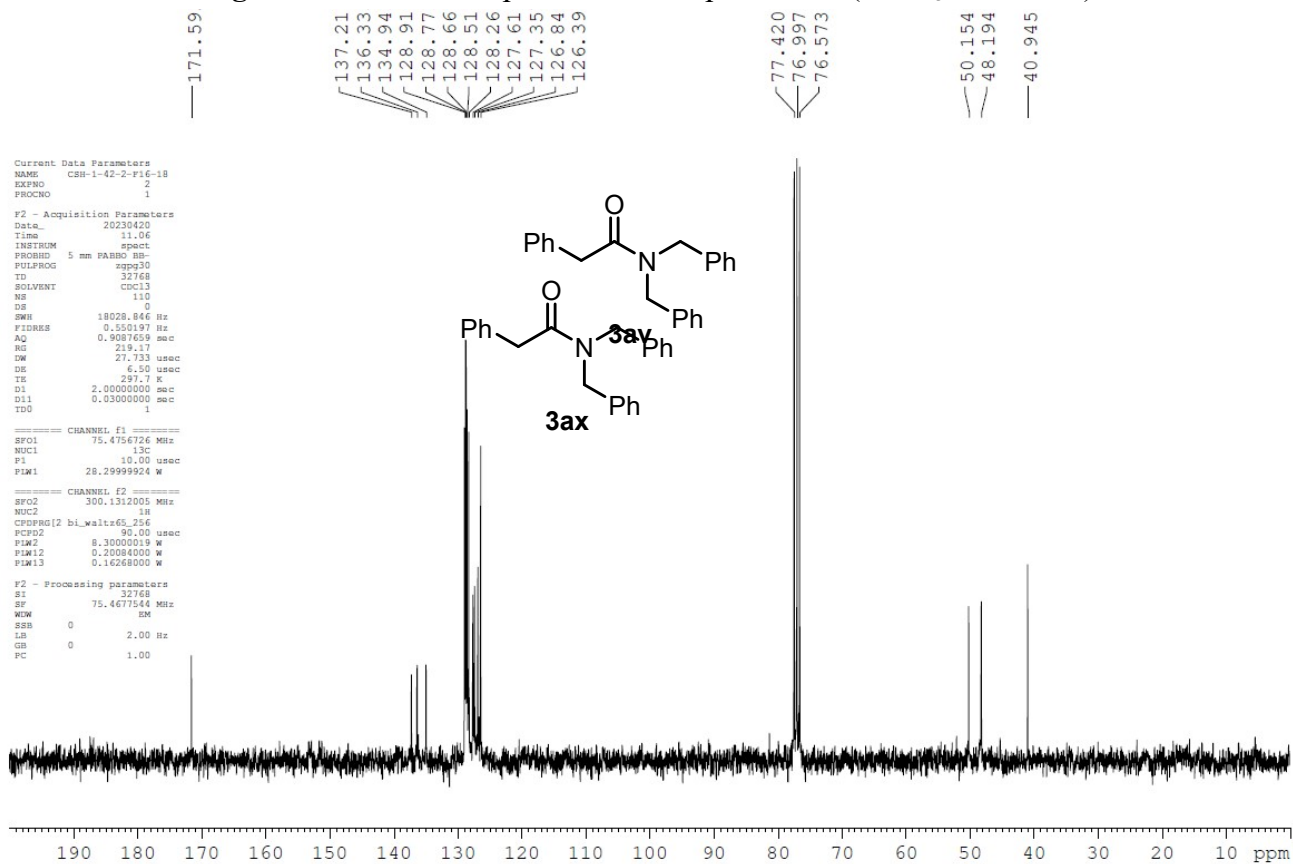

Figure S95. <sup>13</sup>C NMR spectrum of compound **3av** (CDCl<sub>3</sub>, 75 MHz)

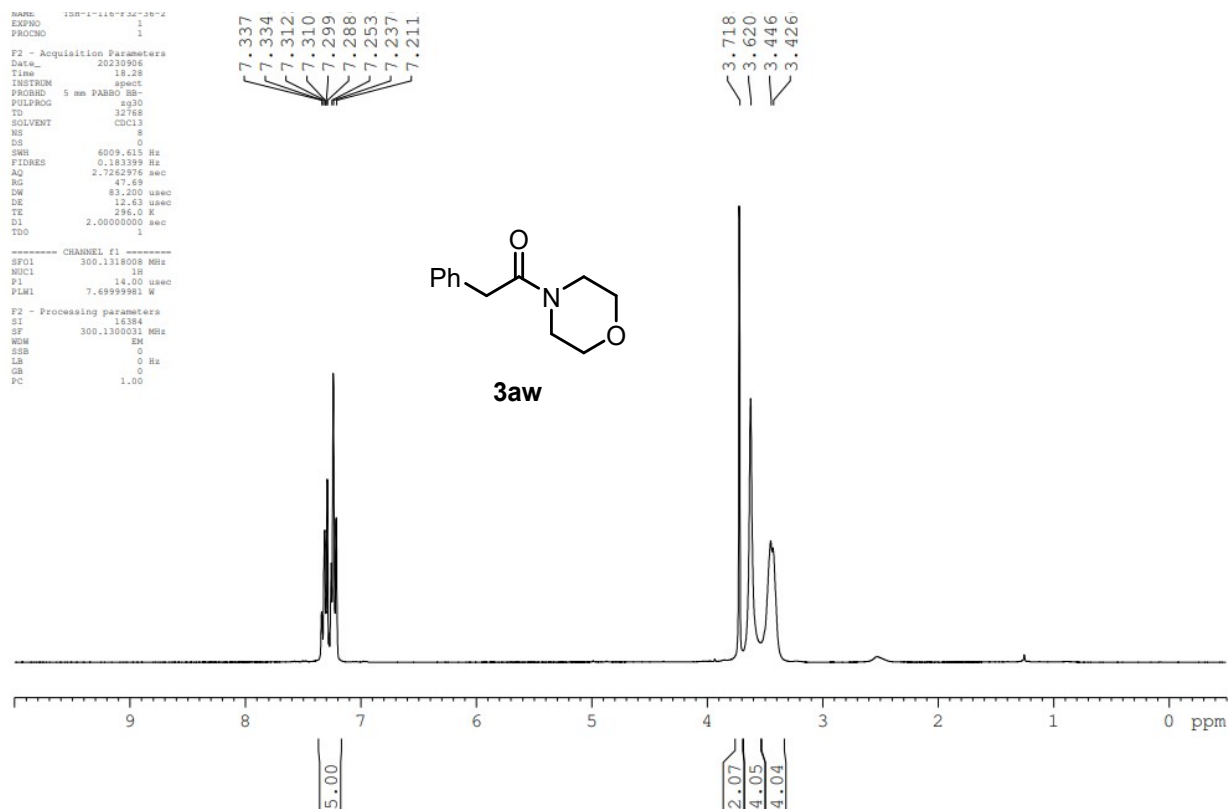

Figure S96. <sup>1</sup>H NMR spectrum of compound **3aw** (CDCl<sub>3</sub>, 300 MHz)

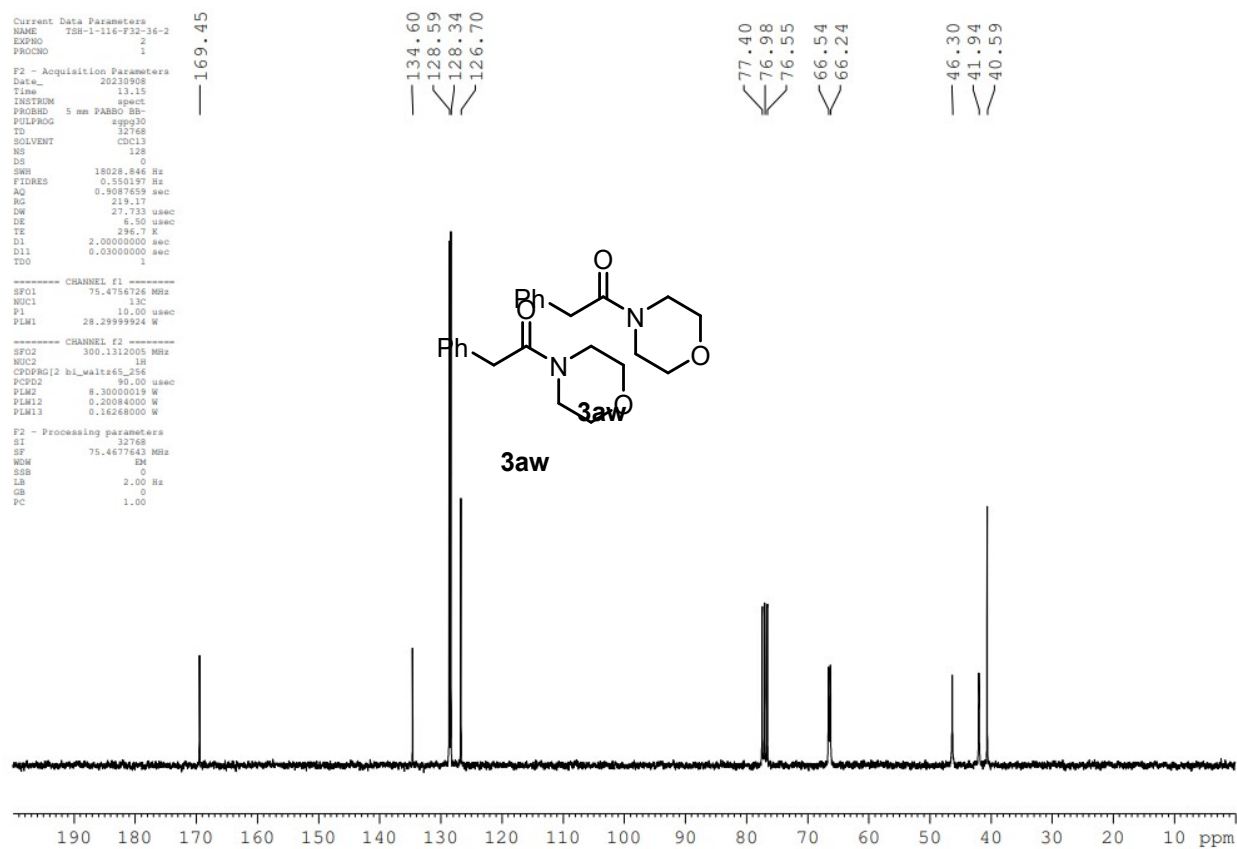

Figure S97. <sup>13</sup>C NMR spectrum of compound **3aw** (CDCl<sub>3</sub>, 75 MHz)

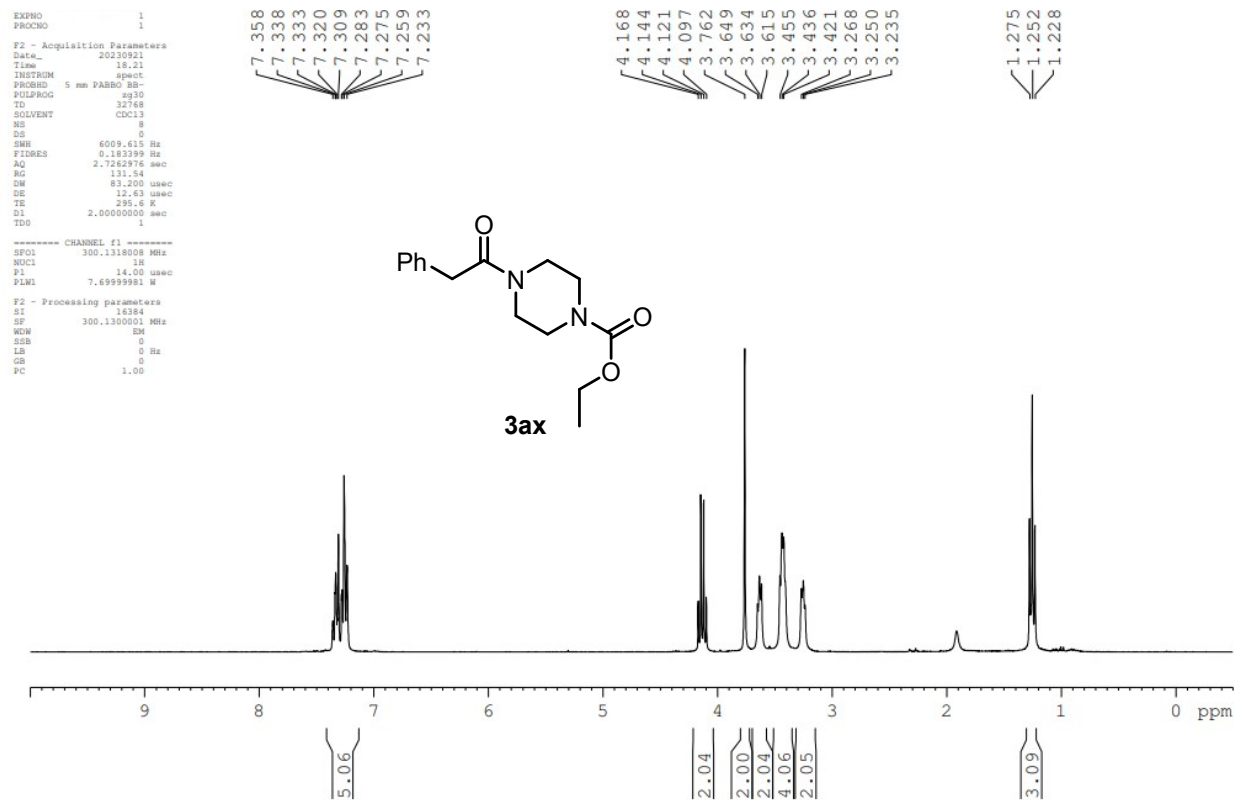

**Figure S98.**  $^1\text{H}$  NMR spectrum of compound **3ax** ( $\text{CDCl}_3$ , 300 MHz)

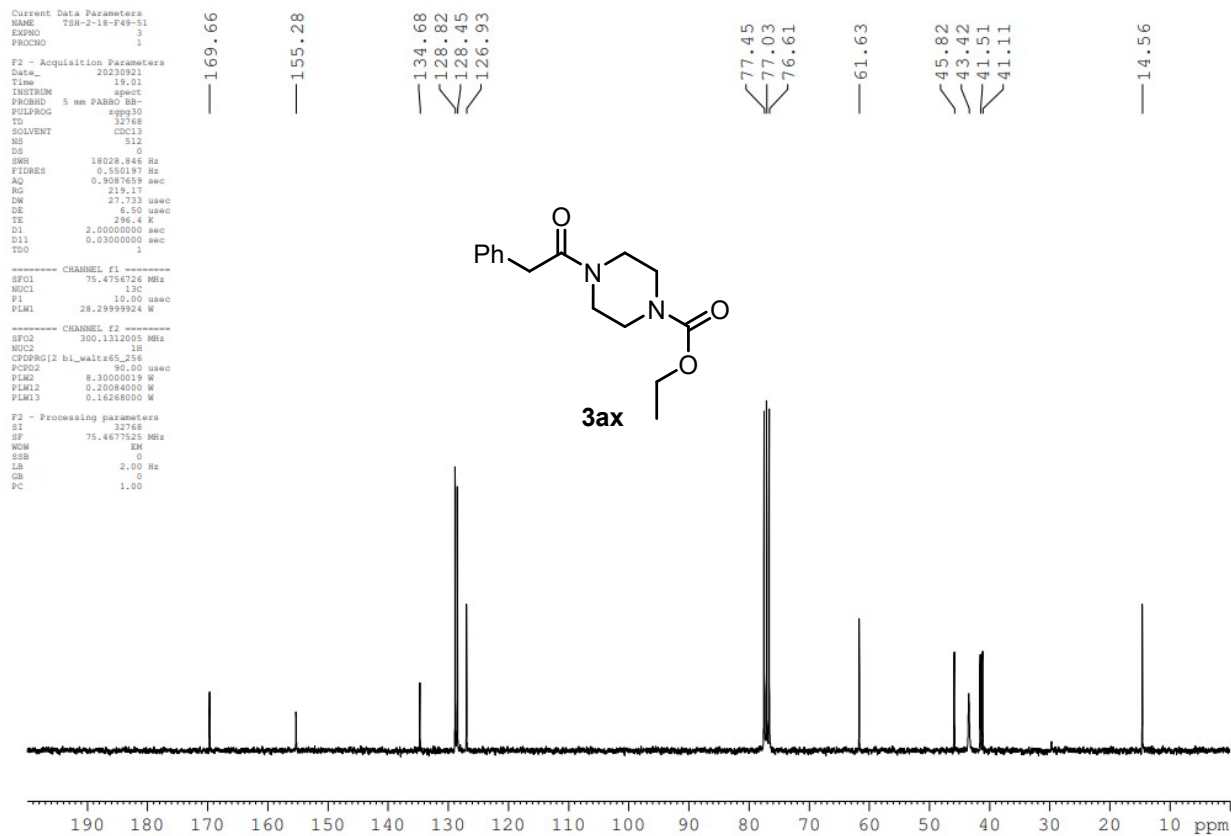

**Figure S99.**  $^{13}\text{C}$  NMR spectrum of compound **3ax** ( $\text{CDCl}_3$ , 75 MHz)

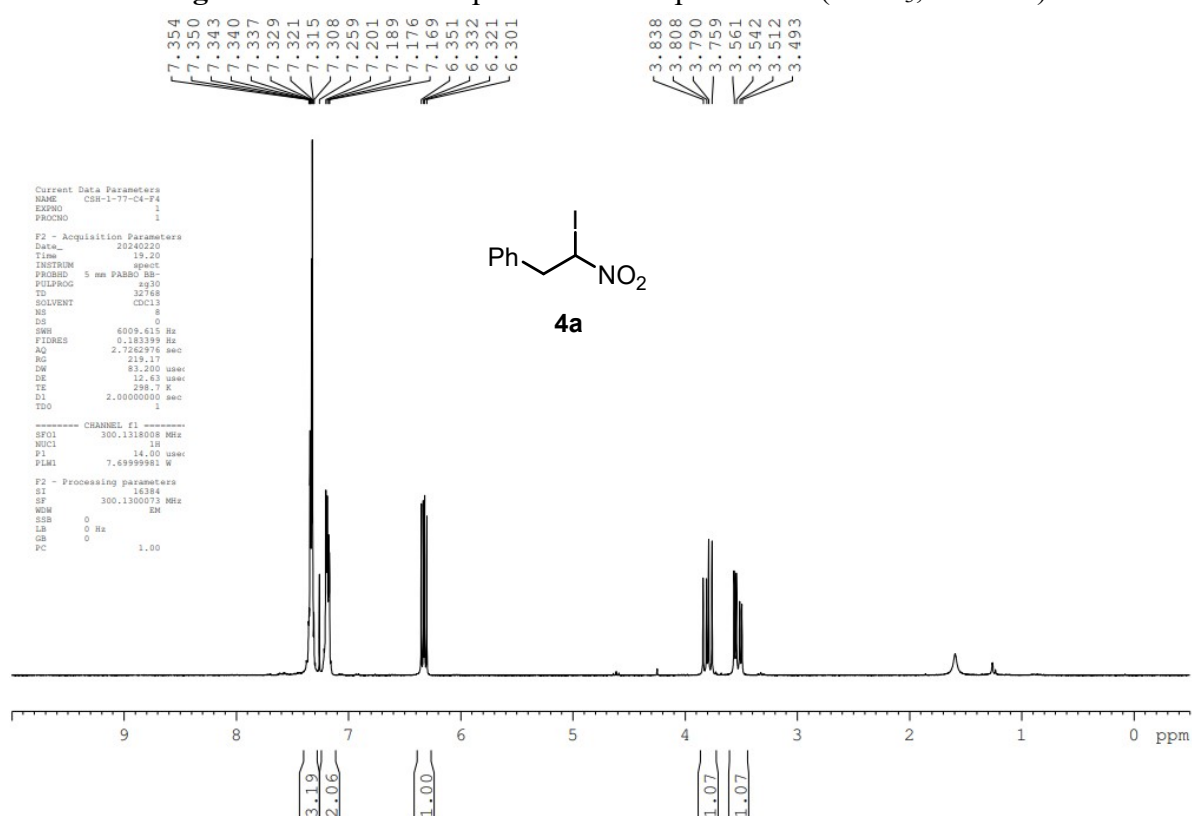

**Figure S100.**  $^1\text{H}$  NMR spectrum of compound **4a** ( $\text{CDCl}_3$ , 300 MHz)

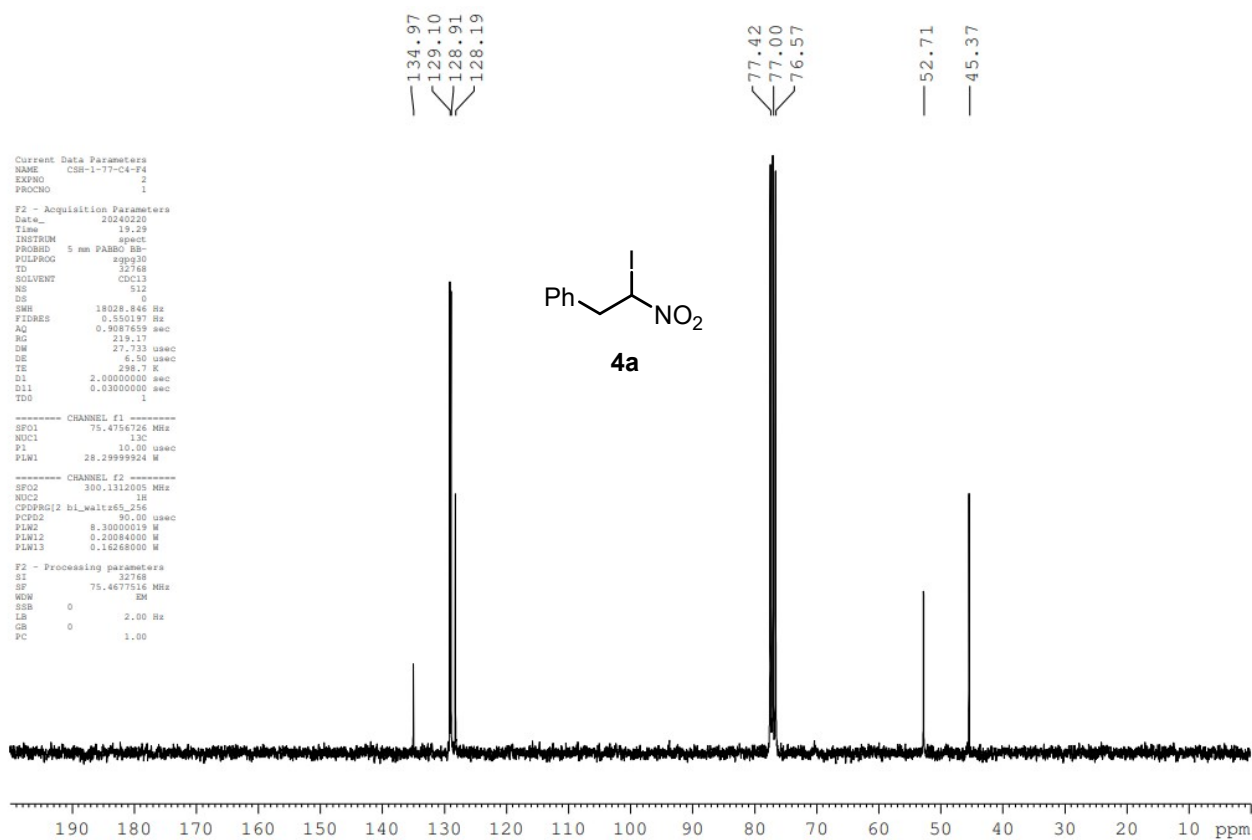

**Figure S101.**  $^{13}\text{C}$  NMR spectrum of compound **4a** ( $\text{CDCl}_3$ , 75 MHz)
